## **Piloting a minimum data set for older people living in care homes in England: a developmental study**

**Adam L Gordon<sup>1,2</sup>**  
**Stacey Rand<sup>3</sup>**  
**Elizabeth Crellin<sup>4</sup>**  
**Stephen Allan<sup>3</sup>**  
**Freya Tracey<sup>4</sup>**  
**Kaat De Corte<sup>4</sup>**  
**Therese Lloyd<sup>4</sup>**  
**Richard Brine<sup>5</sup>**  
**Rachael E Carroll<sup>1,2</sup>**  
**Ann-Marie Towers<sup>6</sup>**  
**Jennifer Kirsty Burton<sup>7</sup>**  
**Gizdem Akdur<sup>8</sup>**  
**Barbara Hanratty<sup>9</sup>**  
**Lucy Webster<sup>6</sup>**  
**Sinead Palmer<sup>3</sup>**  
**Liz Jones<sup>10</sup>**  
**Julienne Meyer<sup>10,11</sup>**  
**Karen Spilsbury<sup>12,13</sup>**  
**Anne Killett<sup>14</sup>**  
**Arne T Wolters<sup>15</sup>**  
**Guy Peryer<sup>14</sup>**  
**Claire Goodman<sup>7,16</sup>**

<sup>1</sup>Academic Unit of Injury, Recovery and Inflammation Sciences, School of Medicine, University of Nottingham, Nottingham, UK.

<sup>2</sup>NIHR Applied Research Collaboration-East Midlands (ARC-EM), Nottingham, UK.

<sup>3</sup>Personal Social Services Research Unit (PSSRU), University of Kent, Canterbury, Kent. CT2 7NF.

<sup>4</sup>Improvement Analytics Unit, the Health Foundation, London, UK.

<sup>5</sup>Our Future Health, London, UK.

<sup>6</sup>Centre for Health Services Studies, University of Kent, Canterbury, Kent, UK. CT2 7NF.

<sup>7</sup>School of Cardiovascular and Metabolic Health, College of Medical, Veterinary and Life Sciences, University of Glasgow, Glasgow, UK.

<sup>8</sup>Centre for Research in Public Health and Community Care (CRIPACC), University of Hertfordshire, College Lane, Hatfield, AL10 9AB, UK

<sup>9</sup>Population Health Sciences Institute, Newcastle University, Newcastle upon Tyne, UK

<sup>10</sup>National Care Forum, London, UK

<sup>11</sup>City, University of London

<sup>12</sup>School of Healthcare, Faculty of Medicine and Health, University of Leeds, Leeds, UK

<sup>13</sup>NIHR Applied Research Collaboration Yorkshire and Humber (YHARC), Bradford, UK

<sup>14</sup>School of Health Sciences, University of East Anglia, Norwich, Norfolk, NR4 7TJ

<sup>15</sup>Cumbria, Northumberland, Tyne and Wear NHS Foundation Trust, Newcastle upon Tyne, UK.

<sup>16</sup>NIHR Applied Research Collaboration-East of England (ARC-EoE), Cambridge, UK

**Corresponding author: Adam Gordon**

**Email: [adam.gordon@nottingham.ac.uk](mailto:adam.gordon@nottingham.ac.uk)**

**Tel: +44 1332 724668**

**Fax: +44 1332 724697**

**Address: Room 4113, Derby Medical School, Royal Derby Hospital, New Uttoxeter Road, Derby. DE22 3NE.**

**All authors have seen and approved the manuscript. The authors have no competing interests to declare.**

## Abstract

### Background

We developed a prototype minimum data set (MDS) for English care homes, assessing feasibility of extracting data directly from digital care records (DCRs) with linkage to health and social care data.

### Methods

Through stakeholder development workshops, literature reviews, surveys and public consultation we developed an aspirational MDS. We identified ways to extract this from existing sources including DCRs and routine health and social care datasets. To address gaps we added validated measures of delirium, cognitive impairment, functional independence and Quality of Life to DCR software. Following routine health and social care data linkage to DCRs, we compared variables recorded across multiple data sources, using a hierarchical approach to reduce missingness where appropriate. We reported proportions of missingness, mean and standard deviation (SD) or frequencies (%) for all variables.

### Results

We recruited 996 residents from 45 care homes in three English Integrated Care Systems. 727 residents had data included in the MDS. Additional data were well completed (<35% missingness at wave 1). Competition for staff time, staff attrition, and software-related implementation issues contributed to missing DCR data. Following data linkage and combining variables where appropriate, missingness was reduced (<=4% where applicable).

### Discussion

Integration of health and social care is predicated on access to data and interoperability. Despite governance challenges we safely linked care home DCRs to statutory health and social care datasets to create a viable prototype MDS for English care homes. We identified issues around data quality, governance, data plurality and data completion essential to MDS implementation going forward.

## Key points

- There is a range of resident information across DCRs, health and social care datasets, which can be combined to provide a more complete picture of residents.
- We developed and implemented a Minimum Dataset linking care home digital care records to statutory health and social care records.
- Information governance for linking data across multiple data owners and data processors is complex and time consuming.
- Standardisation across Digital Care Records Systems would enable data to be used more effectively across the care home sector.
- Establishing shared priorities across key stakeholders interested in care home data is essential for effective MDS implementation.

## Key words

Care homes; minimum dataset; data linkage; quality of life; digital care record

## Background

Care homes provide around-the-clock residential care for people whose needs cannot be met by visiting care. Older people living in care homes often have needs defined by one or more of frailty, multiple long-term conditions, disability or cognitive impairment [1]. Homes can be registered as with or without nursing depending on whether they employ registered nurses to oversee and provide complex healthcare. In England, there are around 372,000 care home places [2].

Day-to-day care for residents generates abundant data spread across records held by care homes, statutory social care organisations, the National Health Service (NHS), residents and their families [3,4]. As records become increasingly digitised, there is an opportunity to collate data to inform decisions about commissioning, care planning and delivery, review and funding at the micro (individual resident), meso (care home and regional system) and macro (national system) levels [4].

Care home residents were amongst those most adversely affected by COVID-19 and the sector was devastated by outbreaks [5]. At pandemic outset, England lacked even rudimentary data on how many people lived in care homes to track COVID-19 incidence [6]. Emergency legislation, now repealed, enabled collated datasets and recognition of their potential to inform and transform care.

In other countries, Minimum Data Sets (MDSs) for care homes already exist. The most widely recognised of these are the US Medicare Minimum Data Set (MDS 3.0) [7] and InterRAI, deployed in multiple jurisdictions [8]. Implementation of MDSs is influenced by mandates and financial incentives supported by: ongoing training to motivate staff to engage with MDS completion; the extent to which completion is built into the working practices, monitoring, and record systems of all staff (including visiting professionals); and digital recording systems that care home staff use to document and discuss care [9]. At the time of writing, there is no national mandate or incentive framework for implementation of an MDS in any of the four UK nations, although plans are underway to standardise some aspects of social care data collection in England [10].

Against this background, we set out to pilot a prototype MDS for English care homes for older people, focussing on homes currently using digital care records (DCRs) [11]. Our objectives were to: (1) assess feasibility of extracting data directly from DCRs and linking these to routinely collected health and social care data to populate a pilot care home MDS; (2) to assess quality and completeness of MDS data; and (3) describe barriers and facilitators to implementation and use. In this article, we address the first two of these objectives. Implementation and use by care home staff and external stakeholders are addressed in a second paper [12].

## Methods

This was a mixed-methods pilot of a prototype MDS. A full protocol is published elsewhere [11].

### Sampling and resident recruitment

We aimed to recruit 20 care homes for older people in each of three Integrated Care Systems (ICSs), totalling 60 homes. ICSs are regional partnerships between NHS organisations, local government and others including third sector and social enterprises, which are responsible for co-ordinating and commissioning care in England. From the 42 English ICSs we chose three – in the South East, East Midlands, and North East – to sample different geographies, socio-economic deprivation indices, and care configurations. Assuming an occupancy rate of 90%, the sample size required for a true representation of the finite older care home population in each of the ICSs, with 90% confidence and 5% margin of error, was 262-268 residents per ICS [11].

Care homes were eligible for inclusion if using DCRs from one of two participating DCR software companies. Initial approaches were made by email, telephone and in-person, with homes recruited from those responding positively.

All permanent residents of participating care homes were eligible. We excluded: residents receiving respite or temporary/short stay care to minimise burden for people undergoing acute transitions; and

residents identified as in the last few days of life by care home staff to protect residents and families at a difficult time. Consent was obtained from residents to access and extract pseudonymised data from their care home, health and social care records and, separately, to link these. Capacity to provide consent to participate was assessed by a researcher at first meeting. For those without capacity, we asked care home staff to send a letter to a family member or friend who could act as a personal consultee as defined by the Mental Capacity Act. Consultee discussions were conducted either face-to-face or by telephone.

### Selecting items for inclusion in the prototype MDS

MDS development was based upon: a review of international research literature summarising outcome measures used in care home studies [13]; a review of measures used in UK care home randomised controlled trials [14]; a systematic review on how contextual factors influence research processes, including data collation in care homes [15]; a series of consultation activities with stakeholders comprising care home managers and staff, and clinical specialists in healthcare of older people and primary care [16–18]; public involvement activity with care home residents, staff and family carers [19]; a survey of data currently collected and collated by English care homes [3]; and a scoping review of published MDSs. From these, we developed nine core principles to govern development and implementation of a care home MDS, previously published [17] (reproduced in Appendix 1).

Based upon these, we compiled an aspirational prototype MDS, containing agreed information and a plan for which routine datasets we hoped to collect these from [11] (summarised in Appendix 2). The systematic review on how contextual factors influence research processes [15] informed our approach to MDS implementation.

### Digital care records (DCRs)

We worked with the Care Software Providers Association (<https://caspa.care>) to identify two leading care management software providers. Through an initial mapping exercise, based on demonstration of a 'standard' user interface by the software providers, we identified variables from the aspirational MDS likely to be included in DCRs.

A dummy data extract from both software providers, completed in summer 2022, identified several variables collected in free text or non-standardised formats. To address gaps in the MDS left by these, that could not be addressed through routine NHS and social care data, additional measures were added to each software system. These included seven validated measures of: *delirium* (I-AGeD) [19]; *cognitive impairment* (MDS Cognitive Performance Scale (MDSCPS)) [22]; *functional independence* (Barthel index) [23]; and *Quality of Life* (QoL) from the Adult Social Care Outcomes Tool Proxy (ASCOT-Proxy-Resident) [24,25], EuroQol 5 domain 5 level proxy version (EQ-5D-5L Proxy 2) (EuroQol) [26], ICECAP-O [27], and QUALIDEM [28].

The QoL measures were selected based on evidence of use in care homes, psychometric properties [22], relevance to different QoL constructs (health, social care, dementia, and older people), and advice from stakeholder consultations and public involvement activity [18]. Taking into account the high prevalence of cognitive impairment in care home residents [1], proxy versions were used. We further included the ASCOT pain item and low mood/anxiety subscale [30], as well as a question to rate overall QoL on a 7-point scale. This overall question was for resident completion where possible, or otherwise by staff proxy. The type of help needed by the resident, if any, was recorded.

Researchers provided specifications for the user interface format, data extract and outputs for these measures, which were then implemented by software providers and tested by researchers using a pilot interface, with revision as needed. In this process, it became evident that some specifications were not possible in both systems due to differences, for example, in how they dealt with missing data and/or because requirements were incompatible with a system's usual function or output.

Researchers met with care home staff to describe and explain the additional variables, and to highlight the need for these to be inputted manually in addition to usual care records. For routinely collected variables, data were extracted from existing records without additional input from care home staff, in the format(s) used by care homes and in an output format feasible for each software provider. This

minimised burden on care homes and software providers but meant researchers had to clean raw data and derive variables.

All DCR variables were collected twice, six months apart, in March-June and September-November 2023. We collected a small amount of data directly from care homes through a short online survey at baseline to better understand context of care, including number of beds, residents, self-funding residents and staff employed by the care home.

### Routinely collected health and social care datasets

We aimed to access the following data sources: general practice electronic medical records and prescribing data, hospital administrative data, operational datasets from emergency services, urgent care and community health, data from local authorities on social care funding, and data from CQC. We expected to access some of these sources at national (e.g. administrative hospital data) and others at local (e.g. community health) level (Appendix 2).

We developed a data flow diagram (Appendix 3) and legal bases for data sharing (Appendix 4).

### Data management and linkage

As the Improvement Analytics Unit based at The Health Foundation (THF) led data management and linkage, data were hosted on THF's secure ISO27001/DSPT accredited Data Analysis Platform (DAP). Data were stored in AWS S3 buckets which only Data Managers and approved project data analysts could access. Access to data was controlled by Data Managers.

For extracts of health and social care information held by different data controllers to be created, pseudonymised and shared with THF, we securely transferred to software providers a unique NHS number salt key to enable pseudonymisation of subjects in the study. A separate salt key was used to pseudonymise the Care Quality Commission (CQC) location identifier (unique for each home). Both salt keys used the SHA256 hashing algorithm. Care home pseudonymisation minimised risk of re-identification of individuals based on location. Care home software providers securely transferred extracted DCRs and pseudonymised NHS numbers and care home identifiers for included residents. Data managers isolated pseudonymised NHS numbers and used a pre-computed rainbow table (password cracking tool) of hashed NHS number and salt combinations to determine actual NHS numbers of subjects. These were securely transferred to data processors of health and social care data to enable extraction of relevant records of consented residents. Salt keys were separately transferred so data processors could pseudonymise NHS numbers and care home identifiers in extracted health and social care information. Pseudonymised records were securely transferred to THF once all other identifiers were removed.

Non-personal, aggregated care home-level online survey data from care homes in the study were securely transferred to THF by University of Kent, and pseudonymised by THF.

The salt keys, rainbow table of hashed NHS number and salt combinations, and data from the survey of care providers with clear CQC location identifiers from University of Kent, were stored in a location accessible only by Data Managers, separated from the extracted pseudonymised DCRs and health and social care records, and deleted after the datasets were linked.

Once data were received from data processors, the data was checked and cleaned and variables were derived. Datasets were linked via pseudonymised NHS numbers and pseudonymised CQC location identifiers.

### Stakeholder engagement

We engaged technical experts within NHS England (NHSE) and the ICSs on information governance, data access and availability. We also engaged with wider stakeholders within each ICS to gain support for the project, to facilitate data sharing, and to inform analyses to be conducted on the MDS. Stakeholders included care home managers, staff, residents and family members, GPs, and local decision makers within the NHS and local authority. We also engaged with DHSC and NHSE

programme teams (Enhanced Health in Care Homes and Ageing Well) at a national level to understand how an MDS could inform national policy priorities.

Importantly, initial buy-in from the three ICSs at the start of the study, three years before resident consent and data collation began, dissipated by the time discussions around data access started. This was due both to key stakeholders leaving and competing priorities for limited analytical and IG resource. Stakeholders who were able to influence data access and had clinical contact with care homes to inform discussions about data analysis differed between ICSs.

### Deriving MDS variables

We designed a person-level, one row per resident MDS. The date on which additional care home measures were first completed by care home staff, or 1 June if missing, was the index date for all other MDS variables. The Elixhauser list of comorbidities[31,32] and a validated list of frailty syndromes [33] were identified from hospital admission data using ICD-10 codes for 3 years prior to each resident's index date. Potentially avoidable admissions were those due to a list of conditions originally developed by the Care Quality Commission [34]

Healthcare utilisation was collated for the year before the index date. By exception, ambulance activity was only calculated for the period between the first and second MDS measurements. "Out of hours" was defined as 18:00-08:00 and "long attendance" as being at Emergency Departments for 12 hours or longer. All variable derivations are detailed in the final MDS data specification (Appendix 5).

### Data Analysis

Where variables were available from multiple data sources, we compared levels of completeness and agreement. To determine which data source(s) would populate the final MDS, we constructed a hierarchy, based on data quality and expert opinion. We distinguished between variables with a universal definition across datasets, such as date of birth or sex, and those which could be defined in multiple ways or vary over time, such as cognitive impairment or delirium. For the first category, we created a hierarchy collapsing all sources into one final variable. For the second, we presented a comparison but retained all variables in the final MDS. By exception, we took an additive approach for dementia. We used Personal Demographic Service (PDS)[35] as the master index based on NHSE guidance, and Secondary Uses Service (SUS) [36] where data were unavailable in PDS. The exception was ethnicity, where we used the care home record in the first instance, as self-reported ethnicity is more accurate than observational data commonly found in secondary care records [37,38].

Date of death can often generate disagreement between systems, mainly because dates of death notification and certification by the Office of National Statistics may differ [38]. However, they rarely vary more than 30 days, with negligible effect on analysis.

To understand the information contained within the MDS, we reported proportions of missingness, mean and standard deviation (SD) or frequency (%) as appropriate. We also derived two-way tables to provide worked examples of opportunities for more detailed descriptive statistics from the MDS, focussing on emergency attendances and ambulance activity based upon discussions with stakeholders described above.

Evaluation of psychometric properties of the QoL measures (ASCOT-Proxy-Resident, ICECAP-O, EQ-5D-5L Proxy 2, QUALIDEM) are reported elsewhere [39,40]. These analyses identified limitations around using QUALIDEM in an older adult care home MDS, so we do not report QUALIDEM results here.

The analysis code is published on Github: <https://github.com/HFAnalyticsLab>. We used R version 4.0.2, SAS Enterprise Guide version 8.3 (NHS and social care routine data), and Stata version 18 (DCR data).

## Results

We recruited 996 residents from 45 care homes (Table **Table**). Working from lists of care home providers using particular DCR software meant brokering relationships with care homes often new to research. Success was greatest in ICS Area 1 because of long-established relationships between the researchers and their local care home community.

**Table 1- Actual versus target recruitment by ICS area**

| ICS Area | Target recruitment | Actual recruitment |
|----------|--------------------|--------------------|
| 1        | 20 care homes      | 19 care homes      |
|          | 320 residents      | 537 residents      |
| 2        | 20 care homes      | 15 care homes      |
|          | 358 residents      | 286 residents      |
| 3        | 20 care homes      | 11 care homes      |
|          | 292 residents      | 173 residents      |
| Total    | 60 care homes      | 45 care homes      |
|          | 970 residents      | 996 residents      |

From 996 eligible residents, 767 had data extracted which could be linked. Of these, 727 residents had complete data for baseline DCR data collection and were included in the final prototype MDS (Figure 1). Of these, 696 had a DCR with a valid CQC identifier enabling linkage to care home level data from CQC records and the online survey.

**Figure 1 – Flow diagram of residents from recruitment into final prototype MDS (Wave 1)**

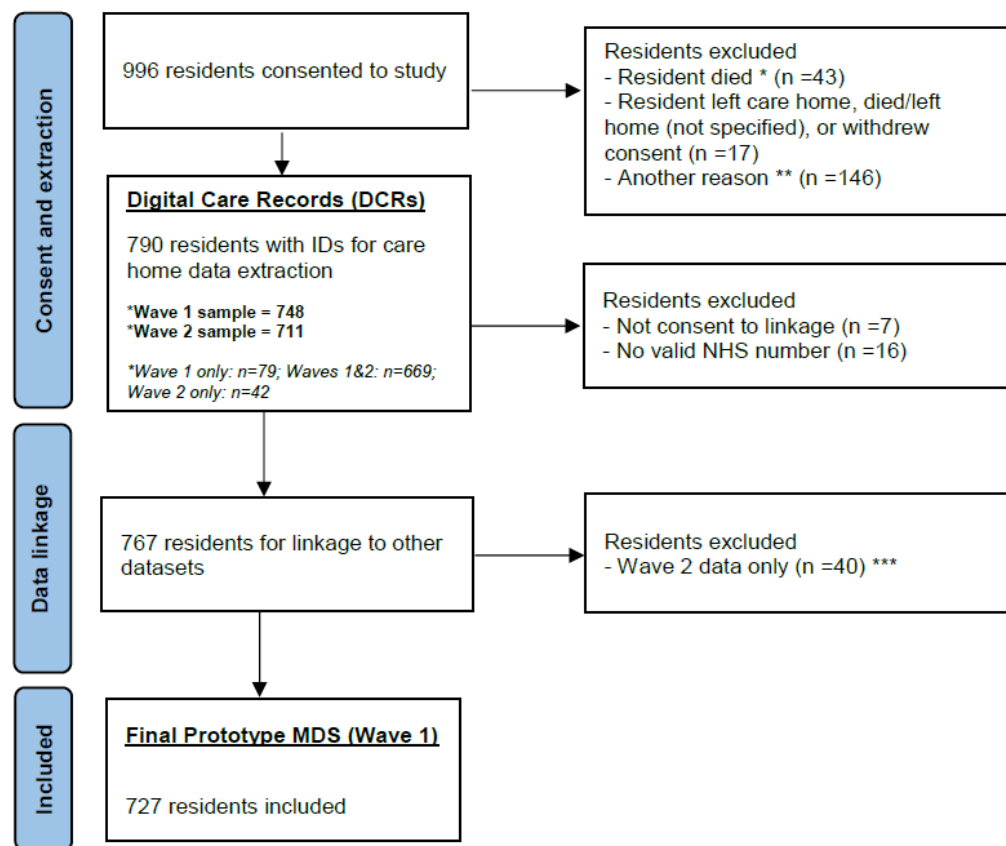

\* This only includes those residents who died before the data extraction from digital care records for Wave 1.

\*\*These include (1) where care homes did not communicate to the research team that the resident had died or moved out of the care home (i.e., in addition to the n= 43+15 notified cases); and (2) where residents were not flagged by care home staff within the system, as was required by Provider 2, to enable them to identify participating residents and extract data from the digital care records. Of the n=146 cases, it is likely that n=97 are due to reason (2), which affected six care homes using Provider 2 software.

\*\*\* In these cases, data extracted from digital care records was missing at Wave 1, but not Wave 2. For the pilot MDS Wave 1 dataset, we excluded those residents without data from digital care records for Wave 1.

### **Digital Care Records (DCRs) from Care Homes**

First, we describe DCR data extracted from care homes (Table 2) before we consider accessed datasets and subsequent linkage into the final prototype MDS. Table 2 includes data for the 790 residents (see Figure 1, under consent and extraction) who provided consent and had a valid ID for data extraction (n=748 at Wave 1, n=711 at Wave 2). For residents with complete data at Wave 1, but not Wave 2, most were attributable to resident death or care home drop-out from the study between waves (see Appendix 6).

Where data were already included in routine DCRs, some variables were more complete than others. CPR status was 99.6% complete. Care homes using Software Provider 2's system did not routinely complete fields including marital status, first language, power of attorney and malnutrition universal screening tool (MUST), which contributed to high levels of missing data. For National Emergency Warning Score 2 (NEWS2) variables, no data were entered by care homes using either software.

The measures added to DCRs for the pilot were more consistently completed compared to those routinely recorded (Wave 1: <35% missing data). This is perhaps to be expected, since we required



software providers to include these measures across participating homes, whereas homes could choose what routine data to record. We also devoted researcher time to explain the new variables and the rationale for their inclusion to care home staff.

In comparing Wave 1 and Wave 2, missing data increased by >8% for deprivation of liberty (7.9% to 21.2% for waves 1 and 2 respectively). For variables added to DCRs, missing data increased between 10% and 18% from Wave 1 to 2, except for the Barthel Index (increased by 36%) and ICECAP-O (increased by 37%). For Barthel, this was likely due to Provider 2 using a similar, but slightly different, version as their system default, which care homes reverted to using rather than the standardised version added for the study. Provider 2 did not return ICECAP-O data for five care homes at Wave 2.

Even with relatively high completion for QoL measures, there were issues with data quality in Wave 2. Provider 2 'carried over' Wave 1 scores; therefore, care homes had to manually overwrite prepopulated scores. By contrast, Provider 1 required data entry of new scores for Wave 2. As a result, all but one care home using Provider 2 software had a maximum of two residents with any change in ASCOT-Proxy-Resident score between Wave 1 and 2, whereas only three residents had the same ASCOT-Proxy-Resident score across waves for homes using Provider 1's software.

**Table 2 – Overview of data extracted from digital care records**

| MDS | Variable               | Categories (if applicable)                                                                | Wave 1 |                                                                |                             | Wave 2 |                                                                |                             | Other comments                                                                                                                                                                                 |
|-----|------------------------|-------------------------------------------------------------------------------------------|--------|----------------------------------------------------------------|-----------------------------|--------|----------------------------------------------------------------|-----------------------------|------------------------------------------------------------------------------------------------------------------------------------------------------------------------------------------------|
|     |                        |                                                                                           | n      | Mean, SD. (Range) or Freq. %                                   | % Missing data <sup>1</sup> | n      | Mean, SD. (Range) or Freq. %                                   | % Missing data <sup>2</sup> |                                                                                                                                                                                                |
| 1   | Ethnicity              | Asian or Asian British<br>White or White British                                          | 163    | ≤4%<br>≥96%                                                    | 78.2%                       | 122    | ≤4%<br>≥96%                                                    | 82.8%                       | Derived variable. Coded differently by the two software providers.                                                                                                                             |
| 1   | Religion               | No religion<br>Christian<br>Buddhist<br>Other                                             | 119    | 11.8%<br>≥76.5%<br>≤5%<br>6.7%                                 | 84.1%                       | 89     | 9.0%<br>≥79%<br>≤6%<br>≤6%                                     | 87.5%                       | Derived variable. Coded differently by the two software providers.                                                                                                                             |
| 1   | Marital Status         | Married/cohabit<br>Widowed<br>Divorced/single/separated                                   | 114    | 35.1%<br>50.9%<br>14.0%                                        | 84.8%                       | 120    | 34.2%<br>49.2%<br>16.6%                                        | 83.1%                       | Not available for Provider 2 (100% missing).                                                                                                                                                   |
| 1   | First Language         | English<br>Other                                                                          | 170    | ≥96%<br>≤4%                                                    | 77.3%                       | 134    | ≥96%<br>≤4%                                                    | 81.2%                       | Not available for Provider 2 (100% missing).                                                                                                                                                   |
| 1   | Deprivation of Liberty | No<br>Yes                                                                                 | 689    | 81.3%<br>18.7%                                                 | 7.9%                        | 560    | 76.8%<br>23.2%                                                 | 21.2%                       |                                                                                                                                                                                                |
| 1   | Weight                 | 20-35kg<br>36-50kg<br>51-65kg<br>66-80kg<br>81-95kg<br>96-110kg<br>111-125kg<br>126-140kg | 586    | 1.2%<br>19.8%<br>≥39.4%<br>26.3%<br>7.7%<br>3.6%<br>≤1%<br>≤1% | 21.7%                       | 573    | 1.9%<br>19.2%<br>≥37.6%<br>26.9%<br>9.1%<br>3.3%<br>≤1%<br>≤1% | 19.4%                       | Derived variable. Provider 1: numerical, Provider 2: categorical. Majority of missing data (≥95%) are from Provider 2. §                                                                       |
| 1   | Height                 | 111-125cm<br>126-150cm<br>151-170cm<br>171-190cm<br>191-210cm                             | 738    | 1.1%<br>9.8%<br>≥70.1%<br>18.0%<br>≤1%                         | 1.3%                        | 674    | 1.2%<br>11.0%<br>≥68.2%<br>18.6%<br>≤1%                        | 5.2%                        | Derived variable. Provider 1: numerical, Provider 2: categorical.                                                                                                                              |
| 1   | DNACPR Status          | No<br>Yes                                                                                 | 745    | 21.1%<br>78.9%                                                 | 0.4%                        | 707    | 18.7%<br>81.3%                                                 | 0.6%                        |                                                                                                                                                                                                |
| 1   | Power of Attorney      | No<br>Yes                                                                                 | 170    | 62.4%<br>37.6%                                                 | 77.3%                       | 168    | 60.7%<br>39.3%                                                 | 76.4%                       | Not available for Provider 2 (100% missing).                                                                                                                                                   |
| 3   | Length of stay, days   |                                                                                           | 747    | 873.7, 807.5 (<50 to >8,000)                                   | 0.1%                        | 710    | 1,011.4, 815.6 (<50 to >8,000)                                 | 0.1%                        | Derived from date of entry to home. For Provider 2, only have month/year, so set to the 1 <sup>st</sup> of the month. Data quality was improved across waves, since able to verify and correct |

|   |                      |                                                                                                                                                    |     |                                                            |       |     |                                                            |       |                                                                                                                                                                                                                                                       |
|---|----------------------|----------------------------------------------------------------------------------------------------------------------------------------------------|-----|------------------------------------------------------------|-------|-----|------------------------------------------------------------|-------|-------------------------------------------------------------------------------------------------------------------------------------------------------------------------------------------------------------------------------------------------------|
|   |                      |                                                                                                                                                    |     |                                                            |       |     |                                                            |       | anomalous dates (e.g. all set to the same date within a care home). Nevertheless, one case (n=1) omitted due to likely data entry error.                                                                                                              |
| 4 | Textured food/diet   | IDDSI 7 – regular<br>IDDSI 7 – easy to chew<br>IDDSI 6 – soft & bite sized<br>IDDSI 5 – minced & moist<br>IDDSI 4 – pureed<br>IDDSI 3 – liquidized | 687 | ≥71.3%<br>5.1%<br>9.5%<br>7.1%<br>6.0%<br>≤1%              | 8.2%  | 611 | ≥68.3<br>6.7%<br>8.8%<br>8.2%<br>7.0%<br>≤1%               | 14.1% |                                                                                                                                                                                                                                                       |
| 4 | Textured drink/fluid | IDDSI 0 – thin<br>IDDSI 1 – slightly thickened<br>IDDSI 2 – mildly<br>IDDSI 3 – moderately<br>IDDSI 4 – extremely                                  | 672 | ≥89.9<br>4.5%<br>3.6%<br>≤1%<br>≤1%                        | 10.2% | 605 | 89.2%<br>4.8%<br>5.0%<br>≤1%<br>None                       | 14.9% |                                                                                                                                                                                                                                                       |
| 4 | Cognitive impairment | Very severe<br>Severe<br>Moderately severe<br>Moderate<br>Mild<br>Borderline intact<br>Intact                                                      | 630 | 12.5%<br>14.4%<br>12.9%<br>17.9%<br>14.0%<br>9.4%<br>18.9% | 15.8% | 479 | 14.6%<br>17.3%<br>12.9%<br>18.6%<br>12.1%<br>7.7%<br>16.7% | 32.6% | Added to software for the MDS pilot.<br><br>The MDS CPS is calculated from five items: comatose, problem with short-term memory, cognitive skills for daily decision making, being understood by others, and eating ADL. Scored per Morris et al[41]. |
| 4 | Waterlow Score       |                                                                                                                                                    | 542 | 17.8, 7.3<br>(5 to 44)                                     | 27.5% | 473 | 18.3, 7.3<br>(5 to 43)                                     | 33.4% | Score of ≥10 indicates risk for pressure ulcer, with high risk ≥15 and very high risk ≥20. Full score range from 0 to 64. §§                                                                                                                          |
| 4 | Braden Score         |                                                                                                                                                    | 345 | 16.6, 4.0<br>(7 to 23)                                     | 53.9% | 277 | 16.4, 4.0<br>(8 to 23)                                     | 61.0% | Full score range of 6 to 23, with higher scores indicating lower risk of pressure ulcers. Scores ≤10-12 indicate high risk and ≤9 very high risk.                                                                                                     |
| 4 | Barthel Index        |                                                                                                                                                    | 582 | 41.5, 30.2<br>(0 to 100)                                   | 22.2% | 288 | 34.9, 28.7<br>(0 to 100)                                   | 59.5% | Added to software for the pilot. Score from lowest (0) to highest (2) level of functional independence for each item. These are summed, x5, to create a score from lowest (0) to highest (100) independence.                                          |
| 4 | Delirium / I-AGED    |                                                                                                                                                    | 601 | 1.1, 1.8<br>(0 to 10)                                      | 19.7% | 466 | 1.4, 2.1<br>(0 to 10)                                      | 34.5% | Added to software for the pilot. Each of the ten items is scored no (0) or yes (1) and summed to create a scale from 0 to 10. Score of ≥4 indicates delirium[42].                                                                                     |
| 5 | ASCOT Proxy-         |                                                                                                                                                    | 503 | .83, .19<br>(-.17 to 1)                                    | 32.8% | 384 | .81, .19<br>(-.17 to 1)                                    | 46.0% | Added to software for the pilot. Required some recoding to combine.                                                                                                                                                                                   |

|   |                             |                                                                      |     |                                                         |       |     |                                                         |       |                                                                                                                                                                                                                                        |
|---|-----------------------------|----------------------------------------------------------------------|-----|---------------------------------------------------------|-------|-----|---------------------------------------------------------|-------|----------------------------------------------------------------------------------------------------------------------------------------------------------------------------------------------------------------------------------------|
|   | Resident                    |                                                                      |     |                                                         |       |     |                                                         |       | Applied preference weights for ASCOT SCT4 to generate index score from -.17 to 1.0 [43].                                                                                                                                               |
| 5 | ASCOT: anxiety and low mood |                                                                      | 503 | 4.0, 1.5<br>(0 to 6)                                    | 32.8% | 403 | 3.9, 1.5<br>(0 to 6)                                    | 43.3% | Added to software for the pilot. Required some recoding to combine.                                                                                                                                                                    |
| 5 | ASCOT: Pain                 |                                                                      | 568 | 2.2, .8<br>(0 to 3)                                     | 24.1% | 423 | 2.1, .9<br>(0 to 3)                                     | 40.5% | Added to software for the pilot. Required some recoding to combine.                                                                                                                                                                    |
| 5 | ICECAP-O                    |                                                                      | 583 | .73, .21<br>(0 to 1)                                    | 22.1% | 300 | .71, .22<br>(0 to 1)                                    | 57.8% | Added to software for the pilot. Required some recoding to combine. Provider 2: Data not provided for some residents. Score (0 to 1) calculated using UK index values [44].                                                            |
| 5 | EQ-5D-5L Proxy 2            |                                                                      | 650 | .33, .35<br>(-.59 to 1)                                 | 13.1% | 494 | .29, .34<br>(-.35 to 1)                                 | 30.5% | Added to software for the pilot. Required some recoding to combine. Score calculated using the mapping function to convert to EQ-5D-3L and applied UK index values. The UK value set for the EQ-5D-5L is still being developed [45,46] |
| 5 | ASCS QoL                    | So good<br>Very good<br>Good<br>Alright<br>Bad<br>Very bad<br>So bad | 613 | 3.1%<br>26.3%<br>33.9%<br>28.9%<br>5.2%<br>1.5%<br>1.1% | 18.1% | 461 | 3.9%<br>25.8%<br>≥36.1%<br>27.3%<br>4.6%<br>1.3%<br>≤1% | 35.2% | Added to software for the pilot. Required some recoding to combine.                                                                                                                                                                    |
| 6 | NEWS2/ RESTORE2             |                                                                      | 0   | N/A                                                     | 100%  | 0   | N/A                                                     | 100%  | Provider 1. Included in the software for data capture but no data entered by care homes (100% missing). Provider 2. Not available (100% missing).                                                                                      |
| 6 | MUST                        |                                                                      | 169 | .8, 1.2<br>(0 to 5)                                     | 77.4% | 161 | 1.0, 1.3<br>(0 to 4)                                    | 77.4% | MUST scored in last 6 months. A MUST score of 1 indicates medium risk and ≥2 indicated high risk of malnutrition. Not available for Provider 2 (100% missing).                                                                         |

<sup>1</sup> **Wave 1:** n=748 (Provider 1 n=170; Provider 2 n=578)

<sup>2</sup> **Wave 2:** n=711 (Provider 1 n=168; Provider 2 n=543).

§ Included a flag to indicate cases with multiple entries (n=8) for Provider 2. As date of entry was unavailable, one entry was randomly selected.

§§ Included a flag to indicate cases with multiple entries for an individual (n=69) for Provider 2. As date of entry was not available, one entry was randomly selected.

### ***Accessed routinely collected health and social care datasets***

We were able to retrieve and link data from PDS, SUS Admitted Patient Care, Outpatient and Emergency Care datasets, CQC care home data and supplement this with data from our online survey of care homes as planned. We were additionally able to collect data from the newly available national ambulance [47], adult social care client level [48], and community services (CSDS) [49] datasets. A care home residency table created by Arden & GEM Commissioning Support Unit [50] based on PDS data and estimated care home residency dates, and ONS Index of Multiple Deprivation data were also accessed.

Due to information governance constraints, a new data sharing agreement with NHSE was required, which was signed in October 2023. This delayed access to NHSE datasets and restricted the analysis possible in the remaining time. This also adversely impacted set up of data sharing with ICSs.

These datasets were accessed only for consented residents and not for all care home residents in the ICSs as originally planned [11]. In addition to IG challenges, this was primarily because the underlying flow of data previously used to identify care home residents had been replaced, resulting in the complex algorithm [45] for care home identification needing to be redeveloped and validated by NHSE.

We were unable to access GP records because we couldn't establish data sharing agreements for two of the ICSs in time for the study. In the remaining ICS we were able to secure some data sharing agreements with GP practices by working through a Commissioning Support Unit (CSU), a regional body providing data support to NHS organisations. However patient data are held by individual GP practices, and we had to liaise with multiple Data Protection Officers within the same ICS. Ultimately, the number of resident records available from GP practices that signed agreements in time was too low to ensure residents could not be re-identified, and therefore it was not possible to proceed to extraction under General Data Protection Regulations (GDPR). A list of data items we would have accessed from one ICS where we established data sharing agreements, had we been able, is available in Appendix 7.

The inability to collect GP data was a major contributor to the differences between the aspirational and final prototype MDS, summarised in Appendix 8. Other contributors were poor feasibility of extraction from DCRs and high levels of missing data for some items in routine datasets, rendering reliable counts of activity linked to particular conditions or events impossible.

### ***Creating derived variables in prototype MDS***

Due to the absence of GP data, comorbidities were derived from SUS data, using a 3-year lookback period from the index date. We couldn't derive these for 144 residents (20%) who didn't have a hospital admission in that period. Activity summaries were reported for the year leading up to the index date, independent of whether residents joined their current care home within this time period. On average, residents in Wave 1 had been living in the current care home for 28.7 months, with 29% having moved in within the year leading up to their index date.

### ***Hierarchy process***

Table 3 presents the variables included in the hierarchy. For universally defined variables, there were high levels of consistency where recorded. Levels of completeness varied widely – from 1% missing for sex in CSDS to 80% missing for ethnicity in the care home record. Overall, the process of using information from several sources to

populate the final variable included in the MDS greatly reduced the level of missing data (missingness  $\leq 4\%$  across variables).

**Table 3 – Comparison of variables across data sources to determine hierarchy**

| Variable                     | Category               | PDS   |       | SUS |     | CSDS |      | Care home residency |    | Care home record |       | n with non-missing values in both/ all relevant data sets and % agreement |      |            |    |            |     |                         |     |             |    |                          |     |            |    | Final <sup>4</sup>      |     |     |       |       |     |
|------------------------------|------------------------|-------|-------|-----|-----|------|------|---------------------|----|------------------|-------|---------------------------------------------------------------------------|------|------------|----|------------|-----|-------------------------|-----|-------------|----|--------------------------|-----|------------|----|-------------------------|-----|-----|-------|-------|-----|
|                              |                        |       |       |     |     |      |      |                     |    |                  |       | SUS vs CSDS                                                               |      | SUS vs PDS |    | SUS vs CHR |     | SUS vs care home record |     | CSDS vs PDS |    | CSDS vs care home record |     | PDS vs CHR |    | PDS vs care home record |     | All |       |       |     |
|                              |                        | n     | %     | n   | %   | n    | %    | n                   | %  | n                | %     | n                                                                         | %    | n          | %  | n          | %   | n                       | %   | n           | %  | n                        | %   | n          | %  | n                       | %   | n   | %     |       |     |
| Ethnicity                    | White                  | NA    |       | 586 | 81% | 570  | 78%  | NA                  |    | >=151            | >=20% | 473                                                                       | 98%  | NA         | NA | 125        | 99% | NA                      | 92  | 98%         | NA | NA                       | 78  | 99%        |    |                         | 692 | 95% |       |       |     |
|                              | Black or Black British |       |       | 0   | 0%  | <=5  | <=1% |                     |    | 0                | NA    |                                                                           |      |            |    |            |     |                         |     |             |    |                          |     |            |    |                         | <=5 | NA  |       |       |     |
|                              | Asian or Asian British |       |       | 0   | 0%  | 0    | 0%   |                     |    | <=5              | <=1%  |                                                                           |      |            |    |            |     |                         |     |             |    |                          |     |            |    |                         | <=5 | NA  |       |       |     |
|                              | Mixed                  |       |       | <=5 | NA  | 0    | 0%   |                     |    | 0                | NA    |                                                                           |      |            |    |            |     |                         |     |             |    |                          |     |            |    |                         | <=5 | NA  |       |       |     |
|                              | Other                  |       |       | <=5 | NA  | <=5  | <=1% |                     |    | 0                | NA    |                                                                           |      |            |    |            |     |                         |     |             |    |                          |     |            |    |                         | <=5 | NA  |       |       |     |
|                              | Missing                |       |       | 135 | 19% | 149  | 20%  |                     |    | 573              | 79%   |                                                                           |      |            |    |            |     |                         |     |             |    |                          |     |            |    |                         | 25  | 4%  |       |       |     |
| Sex <sup>1</sup>             | Female                 | 453   | 62%   | 487 | 67% | 504  | 69%  | NA                  |    | 178              | 23%   | 684                                                                       | 100% | NA         | NA | 240        | 99% | NA                      | 245 | 99%         | NA | NA                       | 198 | 99%        |    |                         | 542 | 71% |       |       |     |
|                              | Male                   | 175   | 24%   | 205 | 28% | 214  | 29%  |                     |    | 73               | 10%   |                                                                           |      |            |    |            |     |                         |     |             |    |                          |     |            |    |                         | 225 | 29% |       |       |     |
|                              | Missing                | 99    | 14%   | 35  | 5%  | 9    | 1%   |                     |    | 476              | 65%   |                                                                           |      |            |    |            |     |                         |     |             |    |                          |     |            |    |                         | 0   | 0%  |       |       |     |
| Date of birth                | Available              | 628   | 86%   | 692 | 95% | NA   | NA   | NA                  | NA | NA               | 598   | 100%                                                                      | NA   | NA         | NA | NA         | NA  | NA                      | NA  | NA          | NA | NA                       | NA  | NA         | NA | NA                      | NA  | NA  | >=760 | >=99% |     |
|                              | Missing                | 99    | 14%   | 35  | 5%  |      |      |                     |    |                  |       |                                                                           |      |            |    |            |     |                         |     |             |    |                          |     |            |    |                         |     |     | <=5   | <=1%  |     |
| Record of death <sup>2</sup> | Present                | <=5   | NA    | 9   | 1%  | NA   | 577  | 7%                  | NA | NA               | NA    | NA                                                                        | NA   | NA         | NA | NA         | NA  | NA                      | NA  | NA          | NA | NA                       | NA  | NA         | NA | NA                      | NA  | NA  | NA    | 58    | 8%  |
|                              | Not present            | >=720 | >=99% | 718 | 99% |      |      |                     |    |                  |       |                                                                           |      |            |    |            |     |                         |     |             |    |                          |     |            |    |                         |     |     |       | 670   | 92% |

|                       |         |    |     |     |    |    |     |     |    |    |    |     |     |    |    |    |    |    |     |     |     |     |
|-----------------------|---------|----|-----|-----|----|----|-----|-----|----|----|----|-----|-----|----|----|----|----|----|-----|-----|-----|-----|
| Dementia <sup>3</sup> | Yes     | NA | 394 | 54% | NA | NA | 376 | 52% | NA | NA | NA | 342 | 75% | NA | NA | NA | NA | NA | 514 | 71% |     |     |
|                       | No      |    | 189 | 26% |    |    |     |     |    |    |    |     |     |    |    |    |    |    | 199 | 27% | 191 | 26% |
|                       | Missing |    | 144 | 20% |    |    |     |     |    |    |    |     |     |    |    |    |    |    | 152 | 21% | 22  | 3%  |

<sup>1</sup> Source data sets refer to gender but data are recorded as 0/1 and labelled as male/ female so we understand this to be sex

<sup>2</sup> Date of death was determined as agreed where the two dates were within 30 days of each other

<sup>3</sup> Two code lists were used to identify dementia in SUS diagnosis codes (Charlson and frailty; Appendix 9). Additive approach taken where a record with either was identified as dementia present in SUS record.

<sup>4</sup> Collapsed variables were formed using the hierarchy PDS > SUS > CSDS > care home residency > DCR, with exception of ethnicity. For dementia, a record in either SUS or DCR resulted in a record in the final variable.



### **Final prototype MDS**

Key variables from the final prototype MDS are summarised in Table 4. Appendix 10 shows the full version, which includes two approaches to healthcare utilisation – mean activity across all residents, and proportion of residents with at least one event.. Appendix 11 contains worked examples, based upon our work with stakeholders, of how data from the MDS could be used to help understand Emergency Department and Ambulance contacts.

**Table 4 – Selected variables from final prototype MDS. Numbers are reported for 727 residents unless otherwise specified**

| <b>Domain</b>                                        | <b>Variable</b>                              | <b>Categories (if categorical)</b>  | <b>n</b> | <b>Mean (SD) or %</b> |
|------------------------------------------------------|----------------------------------------------|-------------------------------------|----------|-----------------------|
| <b>Demographics/ characteristics</b>                 | Ethnicity (final) <sup>1</sup>               | White                               | 692      | 95%                   |
|                                                      |                                              | Black or Black British              | <=5      | NA                    |
|                                                      |                                              | Asian or Asian British              | <=5      | NA                    |
|                                                      |                                              | Mixed                               | <=5      | NA                    |
|                                                      |                                              | Other                               | <=5      | NA                    |
|                                                      |                                              | Missing                             | 25       | 3%                    |
|                                                      | Sex (final) <sup>1</sup>                     | Female                              | 513      | 71%                   |
|                                                      |                                              | Male                                | 214      | 29%                   |
|                                                      | Date of birth record (final) <sup>1</sup>    | Available                           | >=720    | 99%                   |
|                                                      |                                              | Missing                             | <=5      | NA                    |
| Date of death present in record (final) <sup>1</sup> | Present                                      | 58                                  | 8%       |                       |
|                                                      | Not present                                  | 669                                 | 92%      |                       |
| <b>Palliative care needs</b>                         | Discussed preferred death location indicator | Yes                                 | 18       | 3%                    |
|                                                      |                                              | No                                  | 383      | 53%                   |
|                                                      |                                              | Missing                             | 326      | 45%                   |
|                                                      | Preferred death location                     | Care home                           | 7        | 1%                    |
|                                                      |                                              | Care home services with nursing     | 27       | 4%                    |
|                                                      |                                              | Care home services without nursing  | 51       | 7%                    |
|                                                      |                                              | Hospice                             | <=5      | NA                    |
|                                                      |                                              | Hospital                            | <=5      | NA                    |
|                                                      |                                              | Patient's own home                  | 16       | 2%                    |
|                                                      |                                              | Other (not listed)                  | <=5      | NA                    |
| Missing                                              | 623                                          | 86%                                 |          |                       |
| <b>Care home stay</b>                                | Client funding status                        | Health funded                       | 7        | 1%                    |
|                                                      |                                              | Social care funded                  | 18       | 2%                    |
|                                                      |                                              | Client funded                       | 19       | 3%                    |
|                                                      |                                              | Joint client and social care funded | 96       | 13%                   |
|                                                      |                                              | Other                               | <=5      | NA                    |
|                                                      |                                              | Unknown in record                   | 77       | 11%                   |
|                                                      |                                              | Missing                             | >=505    | 70%                   |

|                                                                                                                                                            |                                                                                   |                              |     |                              |
|------------------------------------------------------------------------------------------------------------------------------------------------------------|-----------------------------------------------------------------------------------|------------------------------|-----|------------------------------|
| <b>Residents needs</b>                                                                                                                                     | Cognitive impairment                                                              | Borderline intact            | 56  | 8%                           |
|                                                                                                                                                            |                                                                                   | Intact                       | 116 | 16%                          |
|                                                                                                                                                            |                                                                                   | Mild impairment              | 85  | 12%                          |
|                                                                                                                                                            |                                                                                   | Moderate impairment          | 111 | 15%                          |
|                                                                                                                                                            |                                                                                   | Moderately severe impairment | 80  | 11%                          |
|                                                                                                                                                            |                                                                                   | Severe impairment            | 88  | 12%                          |
|                                                                                                                                                            |                                                                                   | Very severe impairment       | 76  | 10%                          |
|                                                                                                                                                            |                                                                                   | Missing                      | 115 | 16%                          |
|                                                                                                                                                            | Functional independence (Barthel index) (reported for 566 residents/ 22% missing) |                              |     | 41.40 (30.26)                |
| <b>Quality of life</b>                                                                                                                                     | Ascot Proxy-Resident (reported for 488 residents/ 33% missing)                    |                              |     | 0.83 (0.19)                  |
|                                                                                                                                                            | ICECAP-O (reported for 569 residents/ 22% missing)                                |                              |     | 0.73 (0.21)                  |
|                                                                                                                                                            | EQ-5D-5L Proxy 2                                                                  |                              |     | 0.33 (0.35)                  |
| <b>Diagnoses</b><br>(based on previous 3 years hospital admission diagnosis codes) (reported for 583 residents/ 20% missing) apart from 'dementia (final)' | Dementia (final) <sup>1</sup>                                                     | 514                          | 71% |                              |
|                                                                                                                                                            | <i>Elixhauser conditions</i> <sup>2</sup>                                         |                              |     |                              |
|                                                                                                                                                            | Number of <i>Elixhauser conditions</i>                                            |                              |     | 3.59 (2.34)                  |
|                                                                                                                                                            | 2 or more Elixhauser conditions                                                   | 470                          | 81% |                              |
|                                                                                                                                                            | Anaemia                                                                           | 83                           | 14% |                              |
|                                                                                                                                                            | Congestive heart failure                                                          | 86                           | 15% |                              |
|                                                                                                                                                            | Chronic pulmonary disease                                                         | 110                          | 19% |                              |
|                                                                                                                                                            | Depression                                                                        | 129                          | 22% |                              |
|                                                                                                                                                            | Diabetes (complicated and uncomplicated)                                          | 127                          | 22% |                              |
|                                                                                                                                                            | Fluid and electrolyte disorders                                                   | 226                          | 39% |                              |
|                                                                                                                                                            | Hypertension (complicated and uncomplicated)                                      | 353                          | 61% |                              |
|                                                                                                                                                            | Hypothyroidism                                                                    | 75                           | 13% |                              |
|                                                                                                                                                            | Liver disease                                                                     | 30                           | 5%  |                              |
|                                                                                                                                                            | Obesity                                                                           | 39                           | 7%  |                              |
|                                                                                                                                                            | Other neurological disorders                                                      | 154                          | 26% |                              |
|                                                                                                                                                            | Peripheral vascular disease                                                       | 47                           | 8%  |                              |
|                                                                                                                                                            | Rheumatoid arthritis / collagen vascular diseases                                 | 179                          | 31% |                              |
|                                                                                                                                                            | Renal failure                                                                     | 39                           | 7%  |                              |
|                                                                                                                                                            | Valvular disease                                                                  | 67                           | 11% |                              |
|                                                                                                                                                            | Weight loss                                                                       | 19                           | 3%  |                              |
|                                                                                                                                                            | <i>Frailty syndromes</i> <sup>3</sup>                                             |                              |     |                              |
|                                                                                                                                                            | Number of frailty syndromes                                                       |                              |     | 2.17 (1.81)                  |
|                                                                                                                                                            | Cognitive impairment (delirium, dementia, senility)                               | 457                          | 78% |                              |
|                                                                                                                                                            | Anxiety/Depression                                                                | 168                          | 29% |                              |
|                                                                                                                                                            | Functional dependence                                                             | 102                          | 17% |                              |
|                                                                                                                                                            | Falls/Fractures                                                                   | 291                          | 50% |                              |
|                                                                                                                                                            | Incontinence                                                                      | 105                          | 18% |                              |
| Mobility problems                                                                                                                                          | 217                                                                               | 37%                          |     |                              |
| Pressure ulcers                                                                                                                                            | 62                                                                                | 11%                          |     |                              |
| <b>Healthcare utilisation</b>                                                                                                                              |                                                                                   | n (people with at            |     | % who had at least one event |

|                                                               |                                                                          |                         |     |     |
|---------------------------------------------------------------|--------------------------------------------------------------------------|-------------------------|-----|-----|
|                                                               |                                                                          | least one event)        |     |     |
|                                                               | Elective admissions (1 year history)                                     | 65                      | 9%  |     |
|                                                               | Emergency admissions (1 year history)                                    | 284                     | 39% |     |
|                                                               | Potentially avoidable emergency admissions (1 year history) <sup>4</sup> | 119                     | 16% |     |
|                                                               | Emergency department attendances (1 year history)                        | 370                     | 51% |     |
|                                                               | Community services appointments (1 year history)                         | 608                     | 84% |     |
|                                                               | Face to face community services appointments (1 year history)            | 444                     | 61% |     |
|                                                               | District nursing appointments (1 year history)                           | 398                     | 55% |     |
|                                                               | Ambulance call outs (1 June - 31 October 2023)                           | 197                     | 27% |     |
|                                                               | Ambulance attendances (1 June - 31 October 2023)                         | 195                     | 27% |     |
|                                                               | Ambulance conveyances (1 June - 31 October 2023)                         | 147                     | 20% |     |
| <b>Care home characteristic and workforce characteristics</b> | Service type                                                             | Nursing                 | 403 | 55% |
|                                                               |                                                                          | Nursing and Residential | 49  | 7%  |
|                                                               |                                                                          | Residential             | 262 | 36% |
|                                                               |                                                                          | Missing                 | 13  | 2%  |
|                                                               | Registered bed capacity                                                  | Less than 50            | 211 | 29% |
|                                                               |                                                                          | 50 or more              | 485 | 67% |
|                                                               |                                                                          | Missing                 | 31  | 4%  |
|                                                               | CQC rating                                                               | Outstanding             | 72  | 10% |
|                                                               |                                                                          | Good                    | 511 | 70% |
|                                                               |                                                                          | Requires improvement    | 113 | 16% |
|                                                               |                                                                          | Missing                 | 31  | 4%  |
|                                                               | Years of service registration                                            | Less than 10 years      | 238 | 33% |
|                                                               |                                                                          | More than 10 years      | 458 | 63% |
| Missing                                                       |                                                                          | 31                      | 4%  |     |

#### Footnotes

- 1 - reporting variable as created in the hierarchy process – see Table 3
- 2 - Elixhauser list of comorbidities [31,32]
- 3 - Frailty Syndromes [33]
- 4 - Potentially avoidable emergency admissions [34]

## Discussion

In the face of substantial challenges, many of which were not unique to this study[51,52], we accessed information from care home DCRs and safely linked data from multiple sources and data owners to create a viable prototype MDS for English care homes. Our prototype MDS was cross-sectional. Real-world deployment would be longitudinal, with data extracted at regular intervals, balancing the requirements of those funding, planning and delivering services against burden of data completion and collation.

We set out to collate routine administrative health and social care data for all care home residents in participating ICSs, with linkage to DCRs taking place only for those giving consent. This should have been technically feasible using methods outlined in this paper

alongside a published algorithm to identify care home residents in routine data [53]. However, the algorithm was under redevelopment at the time of our pilot and couldn't be validated in time to be incorporated in our data flow. Our final prototype MDS was therefore limited only to residents providing consent to linkage. This may have introduced systematic bias and data presented here should not be seen as representative of the wider UK care home population. For example, our data on healthcare resource use should be interpreted with caution – we do not know how health status influenced ability to provide consent.

Our data on health status, meanwhile, are limited by lack of access to GP records. This is reflected in lower reported prevalence of common conditions, such as dementia, than in previously published studies, although the prevalence based upon MDS CPS corresponds better to the prevalence cited elsewhere [1,54]. Long-term conditions such as incontinence and hearing loss, central to understanding healthcare needs in care home residents, are under-recorded in secondary care records [54]. If the MDS presented here is to be of use in practice, incorporating GP data is essential. The challenges encountered accessing GP data related to information governance and our role as researchers external to the ICS, coupled with time constraints. It was not due to resistance to the principle of data linkage. GP practices work as independent contractors commissioned by the NHS, each practice acts as data controller for their own patients' data and there is as of yet no national GP dataset.

Our design repurposed routinely collected care home data to minimise care staff burden and focus on capturing what was important to staff and residents. Where data were central to routine care delivery – such as CPR or Deprivation of Liberty status – they were largely complete. Variables that were incomplete were either: regarded as superfluous because care staff know these for their residents (e.g. ethnicity or marital status); captured in free text and difficult to analyse; or difficult to record in a dependent population, (e.g. weight). Variables added via external mandate (e.g. NEWS2, included at the request of healthcare providers) [55], were not completed. For variables added to DCRs by our research team for the pilot, we saw initial high completion rates fall during the second wave of data collection. This was multifactorial, with competition for staff time, staff attrition, and implementation issues including a duplicate Barthel index in some care homes' software, all contributing. These findings align with previous research on the importance of understanding the context of data collection when working with and interpreting data from social care [4,56].

An “off the peg” internationally validated MDS would not necessarily be a viable alternative for the UK. It superimposes a new system of data capture onto care homes, not linked to health and social care data held elsewhere and favours health data over quality of life and social care data. The issues we addressed around GDPR, the labour intensive and manual nature of linkage between care home and NHS data, the complex hierarchy of statutory databases into which an MDS has to interdigitate, and the need to train and invest in care home staff over time, would be the same. Previous attempts to use such MDSs in UK research studies found low completion rates and crucially, a higher burden associated with staff completing them on top of existing data requirements [57,58]. The work of implementation for uptake and sustained use is as significant and arguably more resource intensive than we found for our prototype dataset[59].

We faced issues with standardising approaches to data collection across two software providers and forty-five care homes. Plans underway by the Department of Health and Social Care to develop a Minimum Operating Data standard (MODS) [10] might facilitate some standardisation going forward. However, this MODS has been designed without the comprehensive evidence review and stakeholder consultation conducted for our pilot, and it contains a fraction of the variables included in our prototype MDS. It is likely to be at best an adjunct to a more comprehensive solution and will likely require iteration as implementation challenges, of the sort described here, unfold.

Our prototype MDS focussed on healthcare variables. This reflects, in part, the prominence given to these by all contributors, including care home staff and public representatives, during stakeholder work [16–18]. It also reflects the fact that routine healthcare data are often collected in a way that enables systematic collation and linkage. We found some data in DCRs stored as free text – an approach that provides nuanced and personalised records but hampers collation and analysis at meso- and macro-levels. The incorporation of social care related QoL and wellbeing, in the form the ASCOT-Proxy-Resident and ICECAP-O measures, goes some way to bridge this gap by providing person-centred data focussed around what matters to residents and relatives, collected in a standardised way. QoL data have been highlighted as essential for understanding quality in the sector[60]. For now, there is a trade-off between data collatable in an MDS and data held in free-text. This may, though, be addressed by advances in machine-based analysis of free-text in the future.

We presented in an appendix how the MDS could facilitate understanding of care home residents' use of ambulance services and hospital emergency departments. Our stakeholder work revealed other areas where an MDS could generate insights, including reasons for hospital admissions to inform local service provision or training needs, and understanding pathways and access to services for residents with, for example, diabetes or mental health needs. Whilst this stakeholder wish list demonstrates the potential of an MDS to better understand resident needs, it also raises the challenge frequently reported in the care home literature, of care home staff and providers feeling that they are at the mercy of external forces beyond their control [4,12,58,61]. The evidence on what enables NHS services working with care homes to achieve improved outcomes consistently points to systems and practices that initiate and sustain quality of working relationships between health and social care staff and their organisations [58,62–66]. The powerful insights deliverable through an MDS come with attendant responsibilities. Ensuring that data are used in a way that foster trust between different stakeholder groups is an implementation imperative.

In conclusion, we have developed and demonstrated an MDS based on data-linkage for English care homes. We have identified issues around data quality, information governance, plurality of data and the need for implementation approaches that facilitate data completion, that are essential to implementation of any MDS in English care homes. We have also demonstrated the value of combining data sources to provide richer data and crucially reduce external requests for information from care homes. It is essential that this work moves forward to ensure that we can take data-informed approaches to care delivery, service design, commissioning and policy for the care home sector.

### **Ethics approval**

The study has received ethical approval from the London Queen's Square Research Ethics Committee (22/LO/0250).

### **Conflicts**

The authors have no conflicts of interest to declare.

### **Data availability**

Pseudonymised data will be available on request from the corresponding author following a 24 month embargo from the date of publication.

### **Funding**

This project is funded by the NIHR Health Service Research and Delivery programme (HS&DR NIHR127234) and supported by the NIHR Applied Research Collaboration East of England. Several authors are supported by the NIHR Applied Research Collaborations in Kent, Surrey and Sussex (AMT); East Midlands (ALG); North East and North Cumbria (BH, AW); Yorkshire and Humber (KS); and East of England (GP, AK, and CG). AG, KS

and CG are NIHR Senior Investigators. The views expressed in this publication are those of the authors and not necessarily those of the NIHR or the Department of Health and Social Care.

## Acknowledgements

With thanks to Melissa Co, Sarah Opie-Martin and Tom Prendergast for their help with data cleaning, analysis and quality assurance of the analysis code, to James Lockyer for helpful discussions about routinely collected health and social care datasets, and to Sarah Hardy for her help with final write-up and proof-reading.

## References

- 1 Gordon AL, Franklin M, Bradshaw L, *et al.* Health status of UK care home residents: a cohort study. *Age Ageing*. 2014;43:97–103. doi: 10.1093/ageing/aft077
- 2 Berg V. Care home stats: number of settings, population & workforce, available online at: <https://www.carehome.co.uk/advice/care-home-stats-number-of-settings-population-workforce> (last accessed 28th Jan, 2024).
- 3 Hanratty B, Wolters AT, Towers A-M, *et al.* Data Collection in Care Homes for Older Adults: A National Survey in England. *Journal of Long-Term Care*. 2023;288–96. doi: 10.31389/JLTC.199
- 4 Burton JK, Goodman C, Guthrie B, *et al.* Closing the UK care home data gap – methodological challenges and solutions. *Int J Popul Data Sci*. 2020;5. doi: 10.23889/ijpds.v5i4.1391
- 5 Aalto UL, Pitkälä KH, Andersen-Ranberg K, *et al.* COVID-19 pandemic and mortality in nursing homes across USA and Europe up to October 2021. *Eur Geriatr Med*. 2022;1:1–5. doi: 10.1007/S41999-022-00637-1/FIGURES/1
- 6 Hanratty B, Burton JK, Goodman C, *et al.* Covid-19 and lack of linked datasets for care homes. *BMJ*. 2020;369:m2463. doi: 10.1136/bmj.m2463
- 7 Saliba D, Buchanan J. Making the Investment Count: Revision of the Minimum Data Set for Nursing Homes, MDS 3.0. *J Am Med Dir Assoc*. 2012;13:602–10. doi: 10.1016/J.JAMDA.2012.06.002
- 8 Hirdes JP, Ljunggren G, Morris JN, *et al.* Reliability of the interRAI suite of assessment instruments: a 12-country study of an integrated health information system. *BMC Health Serv Res*. 2008;8:277. doi: 10.1186/1472-6963-8-277
- 9 Musa MK, Akdur G, Brand S, *et al.* The uptake and use of a minimum data set (MDS) for older people living and dying in care homes: a realist review. *BMC Geriatr*. 2022;22:1–14. doi: 10.1186/S12877-021-02705-W/TABLES/3
- 10 Department of Health and Social Care. An Overview of the Minimum Operational Data Standard (MODS), available online at: <https://beta.digitisingsocialcare.co.uk/minimum-operational-data-standard-mods> (last accessed 30th April 2024).
- 11 Towers AM, Gordon A, Wolters AT, *et al.* Piloting of a minimum data set for older people living in care homes in England: protocol for a longitudinal, mixed-methods study. *BMJ Open*. 2023;13:e071686. doi: 10.1136/BMJOPEN-2023-071686
- 12 Carroll RE, Smith N, Palmer SE, *et al.* Piloting a Minimum Data Set (MDS) in English care homes: a qualitative focus group and interview study of professional perspectives on implementation and use. *In Preparation*.
- 13 Kelly S, Cowan A, Akdur G, *et al.* Outcome measures from international older adult care home intervention research: a scoping review. *Age Ageing*. 2023;52:1–10. doi: 10.1093/AGEING/AFAD069
- 14 Irvine L, Burton J, Ali M, *et al.* Data Resource Profile: the Virtual International Care Homes Trials Archive (VICHTA). *Int J Popul Data Sci*. 2023;8. doi: 10.23889/IJPDS.V8I6.2161

- 15 Peryer G, Kelly S, Blake J, *et al.* Contextual factors influencing complex intervention research processes in care homes: a systematic review and framework synthesis. *Age Ageing*. 2022;51:1–16. doi: 10.1093/ageing/afac014
- 16 Feedback on DACHA study 2021 consultation events, available online at <http://dachastudy.com/wp-content/uploads/2021/10/Report-DACHA-consultation-2021.pdf>.
- 17 DACHA 2022 Quality of Life Consultation Feedback Report, available online at: <http://dachastudy.com/wp-content/uploads/2021/10/Report-DACHA-consultation-2021.pdf>.
- 18 Akdur G, Irvine L, Rand S, *et al.* . National stakeholder consultation on how to measure care home residents' quality of life. Under review. *Health Soc Care Deliv Res*.
- 19 Micklewright K, Killett A, Akdur G, *et al.* Activity provider-facilitated patient and public involvement with care home residents. *Res Involv Engagem*. 2024;10:1–12. doi: 10.1186/S40900-023-00537-Z/TABLES/2
- 20 Burton JK, Wolters AT, Towers AM, *et al.* Developing a minimum data set for older adult care homes in the UK: exploring the concept and defining early core principles. *Lancet Healthy Longev*. 2022;3:e186–93. doi: 10.1016/S2666-7568(22)00010-1
- 21 Rhodius-Meester HFM, Van Campen JPCM, Fung W, *et al.* Development and validation of the Informant Assessment of Geriatric Delirium Scale (I-AGeD). Recognition of delirium in geriatric patients. *Eur Geriatr Med*. 2013;4:73–7. doi: 10.1016/J.EURGER.2012.11.006
- 22 Hartmaier SL, Sloane PD, Guess HA, *et al.* Validation of the Minimum Data Set Cognitive Performance Scale: Agreement with the Mini-Mental State Examination. *The Journals of Gerontology: Series A*. 1995;50A:M128–33. doi: 10.1093/GERONA/50A.2.M128
- 23 Wade DT, Collin C. The Barthel ADL Index: a standard measure of physical disability? *Int Disabil Stud*. 1988;10:64–7.
- 24 Rand S, Caiels J, Collins G, *et al.* Developing a proxy version of the Adult social care outcome toolkit (ASCOT). *Health Qual Life Outcomes*. 2017;15:1–14. doi: 10.1186/S12955-017-0682-0/FIGURES/2
- 25 Caiels J, Rand S, Crowther T, *et al.* Exploring the views of being a proxy from the perspective of unpaid carers and paid carers: Developing a proxy version of the Adult Social Care Outcomes Toolkit (ASCOT). *BMC Health Serv Res*. 2019;19:1–11. doi: 10.1186/S12913-019-4025-1/TABLES/2
- 26 EuroQOL. EQ-5D-5L Proxy 2 version, available online at: <https://euroqol.org/faq/proxy-version-2/> (last accessed April 19th, 2024).
- 27 Coast J, Peters TJ, Natarajan L, *et al.* An assessment of the construct validity of the descriptive system for the ICECAP capability measure for older people. *Qual Life Res*. 2008;17:967–76. doi: 10.1007/S11136-008-9372-Z
- 28 Dichter MN, Meyer G. Quality of life of people with dementia in nursing homes. *Dementia in Nursing Homes*. 2017;139–57. doi: 10.1007/978-3-319-49832-4\_11
- 29 Siette J, Knaggs GT, Zurynski Y, *et al.* Systematic review of 29 self-report instruments for assessing quality of life in older adults receiving aged care services. *BMJ Open*. 2021;11:e050892. doi: 10.1136/BMJOPEN-2021-050892
- 30 Towers A-M, Smith N, Allan S, *et al.* Care home residents' quality of life and its association with CQC ratings and workforce issues: the MiCareHQ mixed-methods study. *Health Services and Delivery Research*. 2021;9:1–188. doi: 10.3310/HSDR09190
- 31 Elixhauser A, Steiner C, Harris DR, *et al.* Comorbidity measures for use with administrative data. *Med Care*. 1998;36:8–27. doi: 10.1097/00005650-199801000-00004
- 32 Quan H, Sundararajan V, Halfon P, *et al.* Coding algorithms for defining comorbidities in ICD-9-CM and ICD-10 administrative data. *Med Care*. 2005;43:1130–9. doi: 10.1097/01.MLR.0000182534.19832.83

- 33 Soong J, Poots AJ, Scott S, *et al.* Developing and validating a risk prediction model for acute care based on frailty syndromes. *BMJ Open*. 2015;5. doi: 10.1136/BMJOPEN-2015-008457
- 34 Care Quality Commission., Great Britain. Parliament. House of Commons. The state of health care and adult social care in England in 2012/13. 2013;86.
- 35 NHS England. Personal Demographics Service, available online at: <https://digital.nhs.uk/services/personal-demographics-service> (last accessed 30th April 2024).
- 36 NHS England. Secondary Uses Service (SUS), available online at: <https://digital.nhs.uk/services/secondary-uses-service-sus> (last accessed 30th April 2024).
- 37 Saunders CL, Abel GA, El Turabi A, *et al.* Accuracy of routinely recorded ethnic group information compared with self-reported ethnicity: evidence from the English Cancer Patient Experience survey. *BMJ Open*. 2013;3:e002882. doi: 10.1136/BMJOPEN-2013-002882
- 38 Gallagher AM, Dedman D, Padmanabhan S, *et al.* The accuracy of date of death recording in the Clinical Practice Research Datalink GOLD database in England compared with the Office for National Statistics death registrations. *Pharmacoepidemiol Drug Saf*. 2019;28:563–9. doi: 10.1002/PDS.4747
- 39 Rand S, Towers AM, Allan S, *et al.* Exploratory factor analysis and Rasch analysis to assess the structural validity of the Adult Social Care Outcomes Toolkit Proxy version (ASCOT-Proxy) completed by care home staff. *Quality of Life Research*. 2024;1–13. doi: 10.1007/S11136-024-03631-1/TABLES/7
- 40 Towers A-M, Rand S, Allan S, *et al.* Cross-sectional study assessing the feasibility of measuring residents' Quality of Life in English care homes and assessing the construct validity and internal consistency of measures completed by staff-proxy. *medRxiv*. 2024;2024.05.20.24307612. doi: 10.1101/2024.05.20.24307612
- 41 Morris JN, Fries BE, Mehr DR, *et al.* MDS Cognitive Performance Scale. *J Gerontol*. 1994;49. doi: 10.1093/GERONJ/49.4.M174
- 42 Urfer Dettwiler P, Zúñiga F, Bachnick S, *et al.* Detecting delirium in nursing home residents using the Informant Assessment of Geriatric Delirium (I-AGeD): a validation pilot study. *Eur Geriatr Med*. 2022;13:917–31. doi: 10.1007/S41999-022-00612-W/TABLES/3
- 43 Netten A, Burge P, Malley J, *et al.* Outcomes of social care for adults: developing a preference-weighted measure. *Health Technol Assess*. 2012;16:1–165. doi: 10.3310/HTA16160
- 44 Coast J, Flynn TN, Natarajan L, *et al.* Valuing the ICECAP capability index for older people. *Soc Sci Med*. 2008;67:874–82. doi: 10.1016/J.SOCSCIMED.2008.05.015
- 45 Rowen D, Mukuria C, Bray N, *et al.* UK Valuation of EQ-5D-5L, a Generic Measure of Health-Related Quality of Life: A Study Protocol. *Value in Health*. 2023;26:1625–35. doi: 10.1016/j.jval.2023.08.005
- 46 Van Hout B, Janssen MF, Feng YS, *et al.* Interim scoring for the EQ-5D-5L: mapping the EQ-5D-5L to EQ-5D-3L value sets. *Value Health*. 2012;15:708–15. doi: 10.1016/J.JVAL.2012.02.008
- 47 NHS England. Ambulance Data Set, available online at <https://www.england.nhs.uk/urgent-emergency-care/improving-ambulance-services/ambulance-data-set/> (last accessed 30th April 2024).
- 48 NHS England. Adult Social Care Client Level Data, available online at: <https://digital.nhs.uk/data-and-information/data-collections-and-data-sets/data-sets/adult-social-care-client-level-data> (last accessed 30th April 2024).
- 49 NHS England. Community Services Data Set (CSDS), available online at: <https://digital.nhs.uk/data-and-information/data-collections-and-data-sets/data-sets/community-services-data-set> (last accessed 30th April 2024).
- 50 Arden and GEM Commissioning Support Unit. The National Commissioning Data Repository - NCDR, available online at: <https://www.ardengemcsu.nhs.uk/services/business-intelligence/ncdr/> (last accessed 30th April 2024).



- 51 Taylor JA, Crowe S, Pujol FE, *et al.* The road to hell is paved with good intentions: the experience of applying for national data for linkage and suggestions for improvement. *BMJ Open*. 2021;11:47575. doi: 10.1136/bmjopen-2020-047575
- 52 Williamson K, Nimegeer A, Lean M. Navigating data governance approvals to use routine health and social care data to evidence the hidden population with severe obesity: a case study from a clinical academic's perspective. *Journal of Research in Nursing*. 2022;27:623–36. doi: 10.1177/17449871221122040/ASSET/IMAGES/LARGE/10.1177\_17449871221122040-FIG2.JPEG
- 53 Santos F, Conti S, Wolters A. A novel method for identifying care home residents in England: a validation study. *Int J Popul Data Sci*. 2020;5. doi: 10.23889/IJPD.V5I4.1666
- 54 Burton JK, Ciminata G, Lynch E, *et al.* Understanding Pathways into Care homes using Data (UnPiCD study): a retrospective cohort study using national linked health and social care data. *Age Ageing*. 2022;51:1–11. doi: 10.1093/AGEING/AFAC304
- 55 Barker R, Stocker R, Russell S, *et al.* Distribution of the National Early Warning Score (NEWS) in care home residents. *Age Ageing*.
- 56 Witham MD, Frost H, McMurdo M, *et al.* Construction of a linked health and social care database resource--lessons on process, content and culture. *Inform Health Soc Care*. 2015;40:229–39. doi: 10.3109/17538157.2014.892491
- 57 Onder G, Carpenter I, Finne-Soveri H, *et al.* Assessment of nursing home residents in Europe: the Services and Health for Elderly in Long TERM care (SHELTER) study. *BMC Health Serv Res*. 2012;12:5. doi: 10.1186/1472-6963-12-5
- 58 Goodman C, Davies SL, Gordon AL, *et al.* *Optimal NHS service delivery to care homes: a realist evaluation of the features and mechanisms that support effective working for the continuing care of older people in residential settings*. NIHR Journals Library 2017.
- 59 Kuha S, Vähäkangas P, Kanste O. Implementation leadership of the Resident Assessment Instrument in healthcare services for older people: An interview study of specialists. *J Adv Nurs*. 2024;80:2439–51. doi: 10.1111/JAN.15974
- 60 Spilsbury K, Charlwood A, Thompson C, *et al.* Relationship between staff and quality of care in care homes: StaRQ mixed methods study. *Health and Social Care Delivery Research*. 2024;12:1–139. doi: 10.3310/GWTT8143
- 61 Devi R, Chadborn NH, Meyer J, *et al.* How quality improvement collaboratives work to improve healthcare in care homes: a realist evaluation. *Age Ageing*. 2021;50:1371–81. doi: 10.1093/AGEING/AFAB007
- 62 Goodman C, Davies SL, Gordon AL, *et al.* Relationships, expertise, incentives, and governance: Supporting care home residents' access to health care: An interview study from England. *J Am Med Dir Assoc*. 2015;16. doi: 10.1016/j.jamda.2015.01.072
- 63 Goodman C, Sharpe R, Russell C, *et al.* Care home readiness: a rapid review and consensus workshops on how organisational context affects care home engagement with health care innovation, available online at [http://researchprofiles.herts.ac.uk/portal/files/11749027/Vanguard\\_Care\\_home\\_readiness\\_](http://researchprofiles.herts.ac.uk/portal/files/11749027/Vanguard_Care_home_readiness_).
- 64 Bunn, Goodman, Corazzini, *et al.* Setting Priorities to Inform Assessment of Care Homes' Readiness to Participate in Healthcare Innovation: A Systematic Mapping Review and Consensus Process. *Int J Environ Res Public Health*. 2020;17:987. doi: 10.3390/ijerph17030987
- 65 Devi R, Martin GP, Banerjee J, *et al.* Sustaining interventions in care homes initiated by quality improvement projects: a qualitative study. *BMJ Qual Saf*. 2022;0:1–11. doi: 10.1136/BMJQS-2021-014345
- 66 Hanratty B, Stocker R, Sinclair D, *et al.* Organising general practice for care homes, a multi method study. In press <https://doi.org/10.3310/YNDV6358>.



## **APPENDIX 1 – Core Tenets of an MDS for long-term care homes, reproduced from Burton et al[20]**

1. The MDS must primarily focus on measuring what matters most to support those living in care homes through systematic data collection and sharing.
2. The MDS must be evidence-based in design and contents, requiring co-production with key stakeholders.
3. The MDS must reduce data burden and duplication of effort for the care home. This will be achieved through piloting, collaboration, and ongoing engagement with homes.
4. The MDS will be most effective when underpinned by digital care planning and care records systems, within the care home, serving the day-to-day needs of residents, staff, families, and friends. This requires digital infrastructure and investment to deliver at scale.
5. The MDS will include information on the care home service, individual-level data on residents, and information on the model of staffing that supports them, but will not include individual-level data identifying the workforce in each home.
6. The MDS should bring together data from within the care home, coupled with data held externally about residents and care services.
7. Data sharing with external users of the MDS must have an agreed purpose. Data sharing pathways must be defined and formalised in data sharing agreements, using secure environments for access where appropriate. Care home residents' privacy rights must be protected.
8. Care homes should be supported to access and use the data they collect and share using electronic dashboards.
9. The MDS requires national infrastructure and integration with existing data systems.

## APPENDIX 2 – the Aspirational Minimum Data Set with Proposed Dataset as published in the initial study protocol [11]

|   | Sections                      | Example variables                                                                 | Digital care records | Health and social care datasets                   |
|---|-------------------------------|-----------------------------------------------------------------------------------|----------------------|---------------------------------------------------|
| 1 | Demographics/characteristics  | Date of birth; sex; NHS no; area-based deprivation                                | No                   | Personal demographics service                     |
|   |                               | Religion, languages, marital or partnership status, deprivation of liberty        | Yes                  | No                                                |
|   |                               | Ethnicity; weight; height                                                         | Yes                  | GP data; secondary user services data             |
| 2 | Palliative care needs         | End of life pathway register                                                      | No                   | GP data                                           |
| 3 | Care home stay                | Date of entry to care home; date of death                                         | Yes                  | No                                                |
| 4 | Resident needs                | Skin condition                                                                    | Yes                  | No                                                |
|   |                               | Cognitive impairment and impact on perception, understanding and need for support | Yes*                 | GP data; secondary user services data             |
|   |                               | Oral/nutritional status                                                           | No                   | Secondary user services data                      |
|   |                               | Contenance                                                                        | No                   | Community datasets (where available)              |
| 5 | Quality of life               | Ability to perform activities of daily living; cognitive performance; delirium    | Yes*                 | No                                                |
|   |                               | Outcomes; mood; dementia quality of life                                          | Yes*                 | No                                                |
| 6 | Complications/ adverse events | Infections                                                                        | Yes                  | GP data; secondary user services data             |
|   |                               | Falls (leading to hospital admission or GP visit)                                 | Yes                  | Secondary user services data; 999 data; ambulance |

|    | Sections                                                | Example variables                                                                                                                                                                                        | Digital care records | Health and social care datasets       |
|----|---------------------------------------------------------|----------------------------------------------------------------------------------------------------------------------------------------------------------------------------------------------------------|----------------------|---------------------------------------|
|    |                                                         | Falls (only captured at care home level); early warning score; unintended weight loss                                                                                                                    | Yes                  | data<br>No                            |
| 7  | Diagnoses                                               | Medical history                                                                                                                                                                                          | No                   | Secondary user services data; GP data |
|    |                                                         | Frailty                                                                                                                                                                                                  | No                   | GP data                               |
|    |                                                         | Adverse reactions and allergies                                                                                                                                                                          | No                   | GP data                               |
| 8  | Medication and vaccination                              | Prescribed medication and administered vaccines                                                                                                                                                          | No                   | GP data                               |
| 9  | Healthcare utilisation                                  | Primary care use                                                                                                                                                                                         | No                   | GP data; NHS 111 data; 999 data       |
|    |                                                         | Community nursing; community allied health professionals                                                                                                                                                 | No                   | Community services data set           |
|    |                                                         | Out-of-hours contacts                                                                                                                                                                                    | No                   | GP out-of-hours data                  |
|    |                                                         | Ambulance call-outs                                                                                                                                                                                      | No                   | Ambulance data                        |
|    |                                                         | Accident and Emergency (A&E) attendance; emergency admissions; secondary care usage (outpatient appointments and elective admission)                                                                     | No                   | Secondary user services data          |
| 10 | Care home characteristics and workforce characteristics | Type of home; care home characteristics, specialities and client groups; location of care home; area-based deprivation; registered bed capacity; sector of provider; provider ownership type; CQC rating | No                   | CQC data                              |
|    |                                                         | Staffing model; staffing ratios; numbers and types of staff; no of agency staff; no and type of vacancies                                                                                                | No†                  | Skills for care data                  |

**\*Added to the software for the purposes of the pilot study.**

**†As the Skills for Care workforce survey is voluntary, participating homes were asked to provide some information on workforce as part of a short online survey for the pilot.**

**CQC: Care Quality Commission; GP: general practitioner; MDS: minimum data set; NHS: National Health Service.**

### APPENDIX 3 - Data Flow Diagram

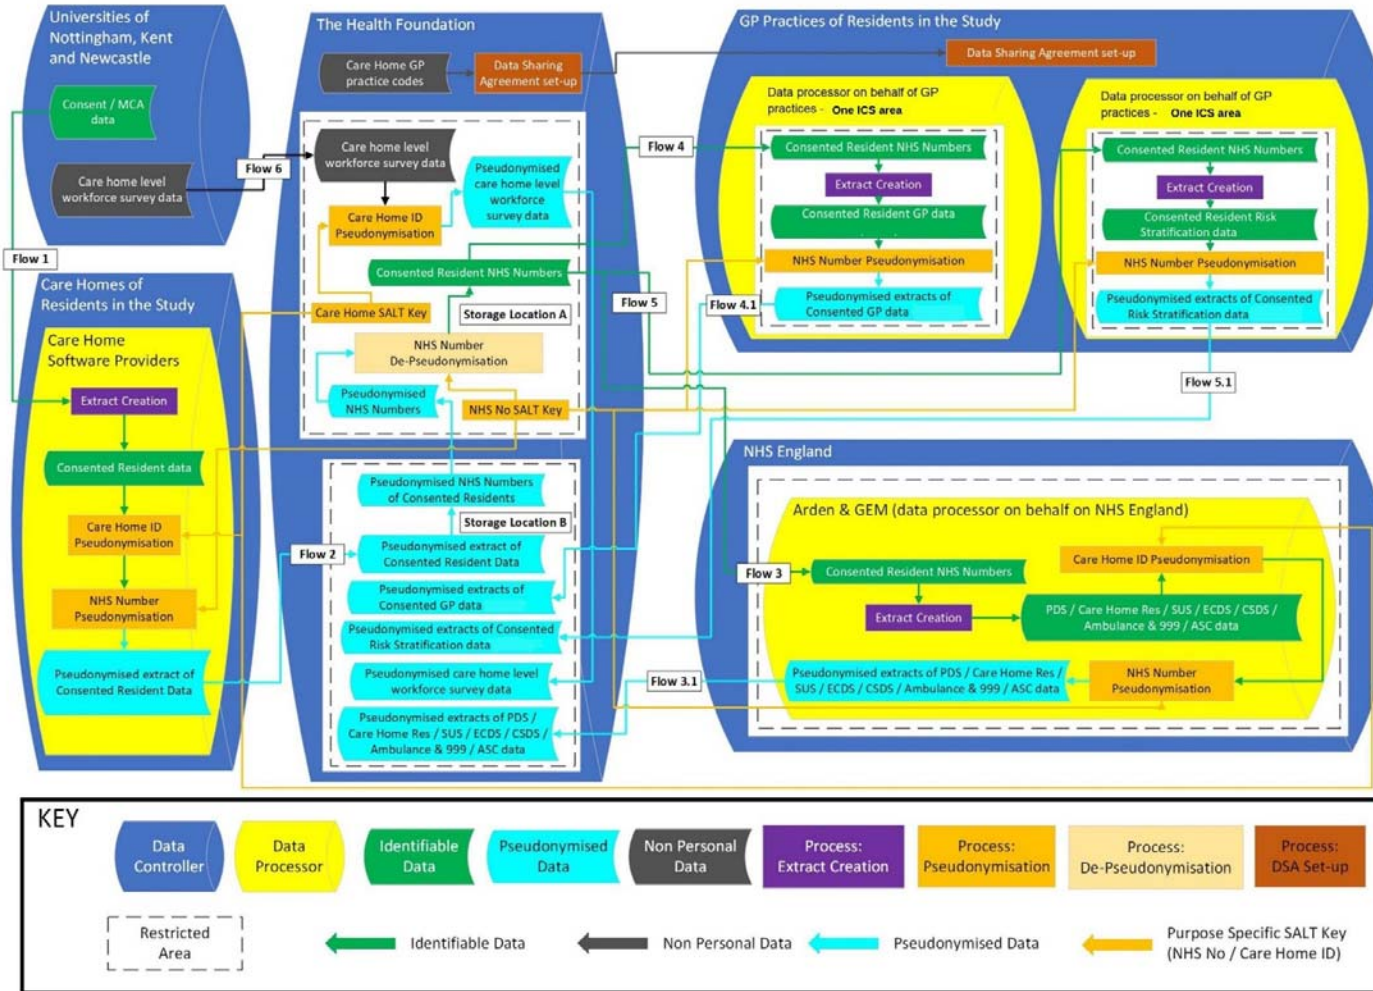



## APPENDIX 4 - Data Sharing Summary Diagram

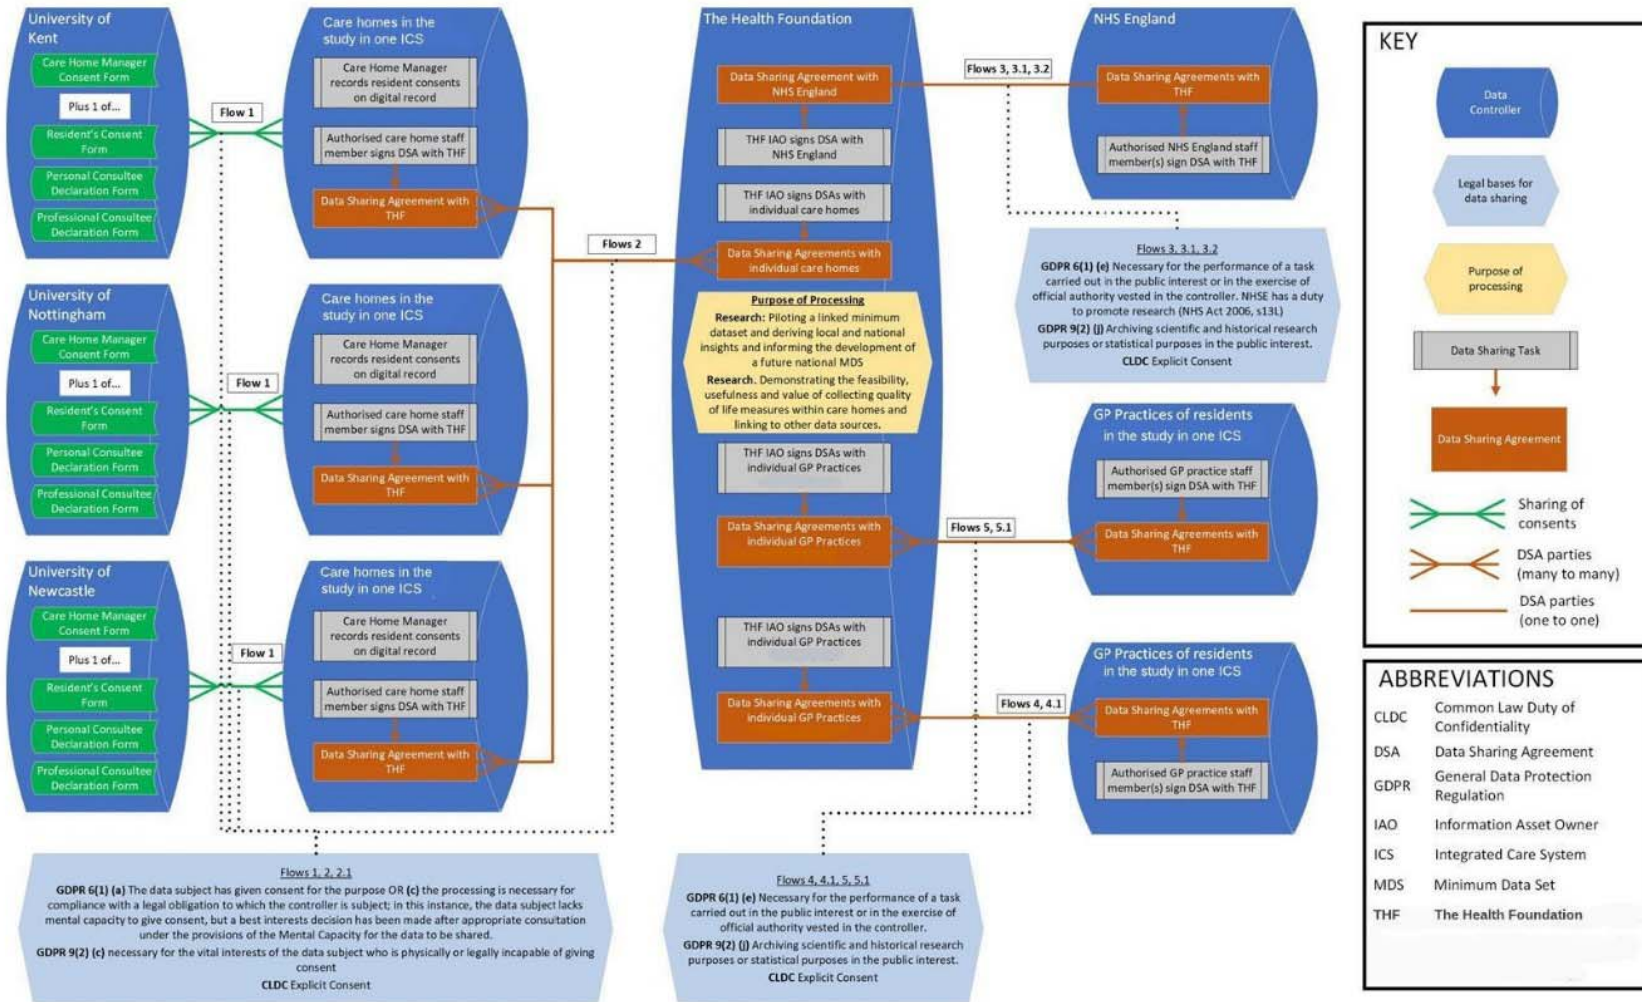



## APPENDIX 5 - Data specifications

**Table a: Data specification for final prototype MDS**

| Domain                        | Variable name   | Description          | Dataset                       | Raw or derived | Derivation method                                                                                                                                                                                                                                                                                                                                                                                                                                                                                                                                                                                                                                                                                                                                                                                                                                                                                                                                                                                                                                                                        |
|-------------------------------|-----------------|----------------------|-------------------------------|----------------|------------------------------------------------------------------------------------------------------------------------------------------------------------------------------------------------------------------------------------------------------------------------------------------------------------------------------------------------------------------------------------------------------------------------------------------------------------------------------------------------------------------------------------------------------------------------------------------------------------------------------------------------------------------------------------------------------------------------------------------------------------------------------------------------------------------------------------------------------------------------------------------------------------------------------------------------------------------------------------------------------------------------------------------------------------------------------------------|
| Demographics/ characteristics | ethnicity_final | Ethnicity (final)    | SUS, CSDS, DCR                | Derived        | <p>From SUS APC, SUS OP and ECDS, mode was taken across all events for the patient (in patient episode, ED attendance or OP appointment).</p> <p>Where there was no modus, counts were generated by patient and ethnicity category. The following code is applied if there is any record in a given category:</p> <p>If there is any record as white and other records are not stated or missing, recorded as white.</p> <p>If there is any record as black and other records are not stated or missing, recorded as black.</p> <p>If there is any record as asian and other records are not stated or missing, recorded as asian.</p> <p>If there is any record as mixed and other records are not stated or missing, recorded as mixed.</p> <p>If there is any record as other and other records are not stated or missing, recorded as other.</p> <p>If there is any record as not stated then recorded as not stated.</p> <p>If none of the above, recorded as missing.</p> <p>The ethnicity record was taken from DCR, then SUS if missing in DCR, then CSDS if missing in SUS.</p> |
| Demographics/ characteristics | sex_final       | Sex (final)          | SUS, PDS, CSDS, DCR,          | Derived        | <p>From SUS APC, SUS OP and ECDS, mode was taken across all events for the patient (in patient episode, ED attendance or OP appointment).</p> <p>Sex was taken from PDS, then SUS if missing in PDS, then CSDS if missing in SUS, then DCR if missing in PDS.</p>                                                                                                                                                                                                                                                                                                                                                                                                                                                                                                                                                                                                                                                                                                                                                                                                                        |
| Demographics/ characteristics | dob_available   | Date of birth record | SUS, PDS                      | Derived        | <p>From SUS APC, SUS OP and SUS ECDS, mode was taken across all events for the patient (in patient episode, ED attendance or OP appointment). Date of birth was generated as the 1st of the month/year.</p> <p>The date of birth was taken from PDS, then SUS if missing in PDS.</p>                                                                                                                                                                                                                                                                                                                                                                                                                                                                                                                                                                                                                                                                                                                                                                                                     |
| Demographics/ characteristics | dod_available   | Date of death record | SUS, PDS, Care home residency | Derived        | <p>From hospital records, death date was taken from the latest of:</p> <p>SUS APC (Episode End date where Discharge Method = 4) and ECDS (Departure Date where Discharge status = "75004002", or Treatment Date or Arrival Date is used if later)</p>                                                                                                                                                                                                                                                                                                                                                                                                                                                                                                                                                                                                                                                                                                                                                                                                                                    |

|                               |                                           |                                                                          |          |         |                                                                                                                                                                                                                             |
|-------------------------------|-------------------------------------------|--------------------------------------------------------------------------|----------|---------|-----------------------------------------------------------------------------------------------------------------------------------------------------------------------------------------------------------------------------|
|                               |                                           |                                                                          |          |         | Date of death was taken from PDS, then SUS if missing in PDS, then Care home residency if missing in SUS.                                                                                                                   |
| Demographics/ characteristics | religion_new                              | Religion                                                                 | DCR      | Derived | Derived variable. Coded differently by the two software providers.                                                                                                                                                          |
| Demographics/ characteristics | maritalstatus_new                         | Marital status                                                           | DCR      | Raw     | NA                                                                                                                                                                                                                          |
| Demographics/ characteristics | firstlanguage                             | First language spoken                                                    | DCR      | Raw     | NA                                                                                                                                                                                                                          |
| Demographics/ characteristics | powerattorney                             | Power of attorney                                                        | DCR      | Raw     | NA                                                                                                                                                                                                                          |
| Demographics/ characteristics | dols                                      | Deprivation of Liberty status                                            | DCR      | Raw     | NA                                                                                                                                                                                                                          |
| Demographics/ characteristics | dnacpr                                    | DNACPR status                                                            | DCR      | Raw     | NA                                                                                                                                                                                                                          |
| Demographics/ characteristics | weight_band                               | Weight                                                                   | DCR      | Derived | Provider 1 numerical data converted to align with provider 2 categorical data                                                                                                                                               |
| Demographics/ characteristics | height_band                               | Height                                                                   | DCR      | Derived | Provider 1 numerical data converted to align with provider 2 categorical data                                                                                                                                               |
| Demographics/ characteristics | IMD_quintile                              | Indices of Deprivation 2019 quintile                                     | PDS; ONS | Derived | LSOA sourced from PDS and combined with ONS Indices of Deprivation 2019 to identify deprivation quintile                                                                                                                    |
| Palliative care needs         | DiscussedPreferredDeathLocation_Indicator | Discussed preferred death location indicator                             | CSDS     | Raw     | NA                                                                                                                                                                                                                          |
| Palliative care needs         | DeathLocationPreferred_Type               | Preferred death location                                                 | CSDS     | Raw     | NA                                                                                                                                                                                                                          |
| Care home stay                | Client_Funding_Status_ASC                 | Client funding status                                                    | ASC      | Raw     | N/A                                                                                                                                                                                                                         |
| Care home stay                | discharge_ch_12h                          | Discharge from an in-patient spell to a care home (1 year history)       | SUS-APC  | Derived | Discharge to care home was derived based on Discharge Destination (codes '54', '65') from continuous in-patient spells. <sup>1</sup><br>Coded as 1 (yes) if there was any record of this in the year before the index date. |
| Care home stay                | death_hosp_postindex                      | Death in hospital in the period between the index date and end of study. | SUS-APC  | Derived | Death in hospital was derived based on Discharge Method (code '4') from continuous in-patient spells. <sup>1</sup><br>Coded as 1 (yes) if there was any record of this between the index date and 31 October 2023.          |
| Care home stay                | los                                       | Length of stay                                                           | DCR      | Derived | Derived from date of entry to home. For Provider 2, only have month/year, so set to the 1st of the month.                                                                                                                   |
| Resident needs                | mdscps                                    | Cognitive impairment                                                     | DCR      | Derived | The MDS CPS is calculated from five items: comatose, problem with short-term memory, cognitive skills for daily decision making, being understood by others, and eating                                                     |

|                |                         |                                         |          |         |                                                                                                                                                                                               |
|----------------|-------------------------|-----------------------------------------|----------|---------|-----------------------------------------------------------------------------------------------------------------------------------------------------------------------------------------------|
|                |                         |                                         |          |         | ADL. Scored per Morris <i>et al</i> , 1994.                                                                                                                                                   |
| Resident needs | barthel_bowel           | Bowel continence                        | DCR      | Derived | Score from lowest (0) to highest (2) level of functional independence for each item. These are summed, x5, to create a score from lowest (0) to highest (100) independence.                   |
| Resident needs | barthel_bladder         | Bladder continence                      | DCR      | Derived | Score from lowest (0) to highest (2) level of functional independence for each item. These are summed, x5, to create a score from lowest (0) to highest (100) independence.                   |
| Resident needs | ascot_q11p              | ASCOT: pain                             | DCR      | Derived | Required some recoding to combine                                                                                                                                                             |
| Resident needs | ascot_mascore_p         | ASCOT: anxiety and low mood             | DCR      | Derived | Required some recoding to combine                                                                                                                                                             |
| Resident needs | iddsi_food              | Food texture requirements               | DCR      | Raw     | NA                                                                                                                                                                                            |
| Resident needs | iddsi_drink             | Drink thickness requirements            | DCR      | Raw     | NA                                                                                                                                                                                            |
| Resident needs | allergy_food            | Food allergy                            | DCR      | Raw     | NA                                                                                                                                                                                            |
| Resident needs | allergy_contact         | Contact allergy                         | DCR      | Raw     | NA                                                                                                                                                                                            |
| Resident needs | allergy_med             | Medication allergy                      | DCR      | Raw     | NA                                                                                                                                                                                            |
| Resident needs | allergy_penicillin      | Penicillin allergy                      | DCR      | Raw     | NA                                                                                                                                                                                            |
| Resident needs | waterlow_recent         | Pressure ulcers (Waterlow score)        | DCR      | Raw     | NA                                                                                                                                                                                            |
| Resident needs | braden                  | Pressure ulcers (Braden score)          | DCR      | Raw     | NA                                                                                                                                                                                            |
| Resident needs | iaged_score             | Delirium (I-AGED score)                 | DCR      | Derived | Each of the ten items is scored no (0) or yes (1) and summed to create a scale from 0 to 10.                                                                                                  |
| Resident needs | barthel                 | Functional independence (Barthel score) | DCR      | Derived | Score from lowest (0) to highest (2) level of functional independence for each item. These are summed, x5, to create a score from lowest (0) to highest (100) independence.                   |
| Resident needs | n_ED_attendances_ngproc | Emergency department attendances with   | SUS-ECDS | Derived | Coded as 1 (yes) if there was a SNOMED code for nasogastric procedure from Der_EC_Treatment_All ("87750000", "6125005", "112861000") in the year before index date, otherwise coded as 0 (no) |

|                               |                   |                                                                                                     |         |         |                                                                                                                                                                                                                            |
|-------------------------------|-------------------|-----------------------------------------------------------------------------------------------------|---------|---------|----------------------------------------------------------------------------------------------------------------------------------------------------------------------------------------------------------------------------|
|                               |                   | nasogastric procedure (1 year history)                                                              |         |         |                                                                                                                                                                                                                            |
| Resident needs                | n_ngproc_op       | Outpatient appointments with nasogastric procedure (1 year history)                                 | SUS-OP  | Derived | Coded as 1 (yes) if there was a procedure code for nasogastric procedure from Der_Procedure_All (OPCS codes) recorded for an outpatient appointment in the year before index date, otherwise coded as 0 (no)               |
| Resident needs                | mdscps            | Cognitive impairment                                                                                | DCR     | Derived | MDS CPS is calculated from five items: comatose, problem with short-term memory, cognitive skills for daily decision making, being understood by others, and eating ADL. Scored per Morris <i>et al</i> , 1994.            |
| Quality of life               | ascs_qol_score    | Quality of life overall                                                                             | DCR     | Derived | Required some recoding to combine                                                                                                                                                                                          |
| Quality of life               | ascot_scrqol      | Ascot Proxy-Resident                                                                                | DCR     | Derived | Required some recoding to combine. Applied preference weights for ASCOT SCT4 to generate index score from -.17 to 1.0.                                                                                                     |
| Quality of life               | icecap_qol        | ICECAP-O                                                                                            | DCR     | Derived | Required some recoding to combine. Score (0 to 1) calculated using UK index values [.                                                                                                                                      |
| Quality of life               | UK_crosswalk      | EQ-5D-5L Proxy                                                                                      | DCR     | Derived | Required some recoding to combine. Score calculated using the mapping function to convert to EQ-5D-3L and applied UK index values. The UK value set for the EQ-5D-5L is still being developed [45,46]                      |
| Complications/ adverse events | must_score_recent | MUST (malnutrition universal scoring tool) score                                                    | DCR     | Raw     | NA                                                                                                                                                                                                                         |
| Complications/ adverse events | adm_lrti_12h      | Frequency of in-patient admissions with lower respiratory tract infection recorded (1 year history) | SUS-APC | Derived | Admissions with lrti recorded were derived based on ICD-10 codes in the primary diagnosis field . Count of admissions with lrti recorded from continuous in-patient spells in the year before the index date. <sup>1</sup> |
| Complications/ adverse events | adm_urti_12h      | Frequency of in-patient admissions with upper respiratory tract infection recorded (1 year history) | SUS-APC | Derived | Admissions with urti recorded were derived based on ICD-10 codes in the primary diagnosis field. Count of admissions with urti recorded from continuous in-patient spells in the year before the index date. <sup>1</sup>  |

|           |                          |                                                     |                 |         |                                                                                                                                                                                                                                                                                                                                                                                                                                                                                                                                                                             |
|-----------|--------------------------|-----------------------------------------------------|-----------------|---------|-----------------------------------------------------------------------------------------------------------------------------------------------------------------------------------------------------------------------------------------------------------------------------------------------------------------------------------------------------------------------------------------------------------------------------------------------------------------------------------------------------------------------------------------------------------------------------|
| Diagnoses | cogimp_sus               | Cognitive impairment (delirium, dementia, senility) | SUS-APC         | Derived | Diagnosis flags were derived based on ICD-10 codes in the diagnosis fields for each episode. Coded as 1 (yes) if there was a record of any of delirium, dementia or senility (using Soong et al 2015 code list) in the patient's hospital admissions in 3 years before the index date, otherwise coded as 0 (no)                                                                                                                                                                                                                                                            |
| Diagnoses | dementia_final           | Dementia (final)                                    | SUS-APC and DCR | Derived | Diagnosis flags were derived from SUS-APC based on ICD-10 codes in the diagnosis fields for each episode. Dementia status is selected first from SUS (a resident has dementia if identified through either the code list used for Charlson index or Soong et al Frailty), coded as 1 if there was any record of the condition in the patient's hospital admissions in the previous 3 years, and if missing, from DCR. Note if a person does not have dementia recorded in SUS but does in care home record then they will be recorded as having dementia in dementia_final. |
| Diagnoses | nr_elix_h36              | Elixhauser no conditions based on 3 years history   | SUS-APC         | Derived | Diagnosis flags were derived based on ICD-10 codes in the diagnosis fields for each episode. Count of conditions in the Elixhauser list of comorbidities <sup>2</sup> in the patient's hospital admissions in 3 years before the index date.                                                                                                                                                                                                                                                                                                                                |
| Diagnoses | nr_elix_2_h36            | Elixhauser conditions >=2 based on 3 years history  | SUS-APC         | Derived | Diagnosis flags were derived based on ICD-10 codes in the diagnosis fields for each episode. Coded as 1 (yes) if there were >= conditions in the Elixhauser list of comorbidities <sup>2</sup> in the patient's hospital admissions in 3 years before the index date.                                                                                                                                                                                                                                                                                                       |
| Diagnoses | e_alco_abuse_h36         | Alcohol abuse <sup>2</sup>                          | SUS-APC         | Derived | Diagnosis flags were derived based on ICD-10 codes in the diagnosis fields for each episode. Coded as 1 (yes) if there was any record of the condition in the patient's hospital admissions in 3 years before the index date.                                                                                                                                                                                                                                                                                                                                               |
| Diagnoses | e_anaemia_bloodloss_h36  | Blood loss anaemia <sup>2</sup>                     | SUS-APC         | Derived | Diagnosis flags were derived based on ICD-10 codes in the diagnosis fields for each episode. Coded as 1 (yes) if there was any record of the condition in the patient's hospital admissions in 3 years before the index date.                                                                                                                                                                                                                                                                                                                                               |
| Diagnoses | e_anaemia_deficiency_h36 | Deficiency anaemia <sup>2</sup>                     | SUS-APC         | Derived | Diagnosis flags were derived based on ICD-10 codes in the diagnosis fields for each episode. Coded as 1 (yes) if there was any record of the condition in the patient's hospital admissions in 3 years before the index date.                                                                                                                                                                                                                                                                                                                                               |

|           |                    |                                              |         |         |                                                                                                                                                                                                                               |
|-----------|--------------------|----------------------------------------------|---------|---------|-------------------------------------------------------------------------------------------------------------------------------------------------------------------------------------------------------------------------------|
| Diagnoses | e_arrhythmias_h36  | Cardiac arrhythmias <sup>2</sup>             | SUS-APC | Derived | Diagnosis flags were derived based on ICD-10 codes in the diagnosis fields for each episode. Coded as 1 (yes) if there was any record of the condition in the patient's hospital admissions in 3 years before the index date. |
| Diagnoses | e_coagulopathy_h36 | Coagulopathy <sup>2</sup>                    | SUS-APC | Derived | Diagnosis flags were derived based on ICD-10 codes in the diagnosis fields for each episode. Coded as 1 (yes) if there was any record of the condition in the patient's hospital admissions in 3 years before the index date. |
| Diagnoses | e_depression_h36   | Depression <sup>2</sup>                      | SUS-APC | Derived | Diagnosis flags were derived based on ICD-10 codes in the diagnosis fields for each episode. Coded as 1 (yes) if there was any record of the condition in the patient's hospital admissions in 3 years before the index date. |
| Diagnoses | e_diab_comp_h36    | Diabetes, complicated <sup>2</sup>           | SUS-APC | Derived | Diagnosis flags were derived based on ICD-10 codes in the diagnosis fields for each episode. Coded as 1 (yes) if there was any record of the condition in the patient's hospital admissions in 3 years before the index date. |
| Diagnoses | e_diab_uncomp_h36  | Diabetes, uncomplected <sup>2</sup>          | SUS-APC | Derived | Diagnosis flags were derived based on ICD-10 codes in the diagnosis fields for each episode. Coded as 1 (yes) if there was any record of the condition in the patient's hospital admissions in 3 years before the index date. |
| Diagnoses | e_drug_abuse_h36   | Drug abuse <sup>2</sup>                      | SUS-APC | Derived | Diagnosis flags were derived based on ICD-10 codes in the diagnosis fields for each episode. Coded as 1 (yes) if there was any record of the condition in the patient's hospital admissions in 3 years before the index date. |
| Diagnoses | e_fluid_h36        | Fluid and electrolyte disorders <sup>2</sup> | SUS-APC | Derived | Diagnosis flags were derived based on ICD-10 codes in the diagnosis fields for each episode. Coded as 1 (yes) if there was any record of the condition in the patient's hospital admissions in 3 years before the index date. |
| Diagnoses | e_ht_comp_h36      | Hypertension, complicated <sup>2</sup>       | SUS-APC | Derived | Diagnosis flags were derived based on ICD-10 codes in the diagnosis fields for each episode. Coded as 1 (yes) if there was any record of the condition in the patient's hospital admissions in 3 years before the index date. |
| Diagnoses | e_ht_uncomp_h36    | Hypertension, uncomplected <sup>2</sup>      | SUS-APC | Derived | Diagnosis flags were derived based on ICD-10 codes in the diagnosis fields for each episode. Coded as 1 (yes) if there was any record of the condition in the patient's hospital admissions in 3 years before the index date. |

|           |                    |                                                 |         |         |                                                                                                                                                                                                                               |
|-----------|--------------------|-------------------------------------------------|---------|---------|-------------------------------------------------------------------------------------------------------------------------------------------------------------------------------------------------------------------------------|
| Diagnoses | e_hypothyroid_h36  | Hypothyroidism <sup>2</sup>                     | SUS-APC | Derived | Diagnosis flags were derived based on ICD-10 codes in the diagnosis fields for each episode. Coded as 1 (yes) if there was any record of the condition in the patient's hospital admissions in 3 years before the index date. |
| Diagnoses | e_liver_h36        | Liver disease <sup>2</sup>                      | SUS-APC | Derived | Diagnosis flags were derived based on ICD-10 codes in the diagnosis fields for each episode. Coded as 1 (yes) if there was any record of the condition in the patient's hospital admissions in 3 years before the index date. |
| Diagnoses | e_lymphoma_h36     | Lymphoma <sup>2</sup>                           | SUS-APC | Derived | Diagnosis flags were derived based on ICD-10 codes in the diagnosis fields for each episode. Coded as 1 (yes) if there was any record of the condition in the patient's hospital admissions in 3 years before the index date. |
| Diagnoses | e_obesity_h36      | Obesity <sup>2</sup>                            | SUS-APC | Derived | Diagnosis flags were derived based on ICD-10 codes in the diagnosis fields for each episode. Coded as 1 (yes) if there was any record of the condition in the patient's hospital admissions in 3 years before the index date. |
| Diagnoses | e_other_neuro_h36  | Other neurological disorders <sup>2</sup>       | SUS-APC | Derived | Diagnosis flags were derived based on ICD-10 codes in the diagnosis fields for each episode. Coded as 1 (yes) if there was any record of the condition in the patient's hospital admissions in 3 years before the index date. |
| Diagnoses | e_peptic_nobld_h36 | Peptic ulcer disease excl bleeding <sup>2</sup> | SUS-APC | Derived | Diagnosis flags were derived based on ICD-10 codes in the diagnosis fields for each episode. Coded as 1 (yes) if there was any record of the condition in the patient's hospital admissions in 3 years before the index date. |
| Diagnoses | e_psychoses_h36    | Psychoses <sup>2</sup>                          | SUS-APC | Derived | Diagnosis flags were derived based on ICD-10 codes in the diagnosis fields for each episode. Coded as 1 (yes) if there was any record of the condition in the patient's hospital admissions in 3 years before the index date. |
| Diagnoses | e_pulmcirc_h36     | Pulmonary circulation disorders <sup>2</sup>    | SUS-APC | Derived | Diagnosis flags were derived based on ICD-10 codes in the diagnosis fields for each episode. Coded as 1 (yes) if there was any record of the condition in the patient's hospital admissions in 3 years before the index date. |
| Diagnoses | e_pvd_h36          | Peripheral vascular disease <sup>2</sup>        | SUS-APC | Derived | Diagnosis flags were derived based on ICD-10 codes in the diagnosis fields for each episode. Coded as 1 (yes) if there was any record of the condition in the patient's hospital admissions in 3 years before the index date. |

|           |                      |                                                                |         |         |                                                                                                                                                                                                                               |
|-----------|----------------------|----------------------------------------------------------------|---------|---------|-------------------------------------------------------------------------------------------------------------------------------------------------------------------------------------------------------------------------------|
| Diagnoses | e_renalfail_h36      | Rheumatoid arthritis / collagen vascular diseases <sup>2</sup> | SUS-APC | Derived | Diagnosis flags were derived based on ICD-10 codes in the diagnosis fields for each episode. Coded as 1 (yes) if there was any record of the condition in the patient's hospital admissions in 3 years before the index date. |
| Diagnoses | e_rheum_arth_h36     | Renal failure <sup>2</sup>                                     | SUS-APC | Derived | Diagnosis flags were derived based on ICD-10 codes in the diagnosis fields for each episode. Coded as 1 (yes) if there was any record of the condition in the patient's hospital admissions in 3 years before the index date. |
| Diagnoses | e_stumour_nomets_h36 | Solid tumour without metastasis <sup>2</sup>                   | SUS-APC | Derived | Diagnosis flags were derived based on ICD-10 codes in the diagnosis fields for each episode. Coded as 1 (yes) if there was any record of the condition in the patient's hospital admissions in 3 years before the index date. |
| Diagnoses | e_valvular_h36       | Valvular disease <sup>2</sup>                                  | SUS-APC | Derived | Diagnosis flags were derived based on ICD-10 codes in the diagnosis fields for each episode. Coded as 1 (yes) if there was any record of the condition in the patient's hospital admissions in 3 years before the index date. |
| Diagnoses | e_weight_loss_h36    | Weight loss <sup>2</sup>                                       | SUS-APC | Derived | Diagnosis flags were derived based on ICD-10 codes in the diagnosis fields for each episode. Coded as 1 (yes) if there was any record of the condition in the patient's hospital admissions in 3 years before the index date. |
| Diagnoses | ec_chf_h36           | Congestive heart failure <sup>2</sup>                          | SUS-APC | Derived | Diagnosis flags were derived based on ICD-10 codes in the diagnosis fields for each episode. Coded as 1 (yes) if there was any record of the condition in the patient's hospital admissions in 3 years before the index date. |
| Diagnoses | ec_cpd_h36           | Chronic pulmonary disease <sup>2</sup>                         | SUS-APC | Derived | Diagnosis flags were derived based on ICD-10 codes in the diagnosis fields for each episode. Coded as 1 (yes) if there was any record of the condition in the patient's hospital admissions in 3 years before the index date. |
| Diagnoses | ec_plegia_h36        | Hemiplegia / paraplegia <sup>2</sup>                           | SUS-APC | Derived | Diagnosis flags were derived based on ICD-10 codes in the diagnosis fields for each episode. Coded as 1 (yes) if there was any record of the condition in the patient's hospital admissions in 3 years before the index date. |
| Diagnoses | ec_stumour_mets_h36  | Metastatic solid tumour / metastatic cancer <sup>2</sup>       | SUS-APC | Derived | Diagnosis flags were derived based on ICD-10 codes in the diagnosis fields for each episode. Coded as 1 (yes) if there was any record of the condition in the patient's hospital admissions in 3 years before the index date. |



|           |                      |                                    |         |         |                                                                                                                                                                                                                                                                                                                                                                                                                  |
|-----------|----------------------|------------------------------------|---------|---------|------------------------------------------------------------------------------------------------------------------------------------------------------------------------------------------------------------------------------------------------------------------------------------------------------------------------------------------------------------------------------------------------------------------|
| Diagnoses | N frailty conditions | Number of frailty conditions       | SUS-APC | Derived | Diagnosis flags were derived based on ICD-10 codes in the diagnosis fields for each episode.<br>Frailty syndromes were cognitive impairment, anxiety or depression, functional dependence, falls or fractures, incontinence, mobility problems and pressure ulcers (Soong et al 2015).<br>Count of frailty syndromes <sup>3</sup> recorded in the patient's hospital admission in 3 years before the index date. |
| Diagnoses | f_delirium_h36       | Delirium <sup>3</sup>              | SUS-APC | Derived | Diagnosis flags were derived based on ICD-10 codes in the diagnosis fields for each episode.<br>Coded as 1 (yes) if there was any record of the condition in the patient's hospital admissions in 3 years before the index date.                                                                                                                                                                                 |
| Diagnoses | f_dementia_h36       | Dementia <sup>3</sup>              | SUS-APC | Derived | Diagnosis flags were derived based on ICD-10 codes in the diagnosis fields for each episode.<br>Coded as 1 (yes) if there was any record of the condition in the patient's hospital admissions in 3 years before the index date.                                                                                                                                                                                 |
| Diagnoses | f_senility_h36       | Senility <sup>3</sup>              | SUS-APC | Derived | Diagnosis flags were derived based on ICD-10 codes in the diagnosis fields for each episode.<br>Coded as 1 (yes) if there was any record of the condition in the patient's hospital admissions in 3 years before the index date.                                                                                                                                                                                 |
| Diagnoses | f_anxdep_h36         | Anxiety/Depression <sup>3</sup>    | SUS-APC | Derived | Diagnosis flags were derived based on ICD-10 codes in the diagnosis fields for each episode.<br>Coded as 1 (yes) if there was any record of the condition in the patient's hospital admissions in 3 years before the index date.                                                                                                                                                                                 |
| Diagnoses | f_dependence_h36     | Functional dependence <sup>3</sup> | SUS-APC | Derived | Diagnosis flags were derived based on ICD-10 codes in the diagnosis fields for each episode.<br>Coded as 1 (yes) if there was any record of the condition in the patient's hospital admissions in 3 years before the index date.                                                                                                                                                                                 |
| Diagnoses | f_fallsfract_h36     | Falls/Fractures <sup>3</sup>       | SUS-APC | Derived | Diagnosis flags were derived based on ICD-10 codes in the diagnosis fields for each episode.<br>Coded as 1 (yes) if there was any record of the condition in the patient's hospital admissions in 3 years before the index date.                                                                                                                                                                                 |
| Diagnoses | f_incont_h36         | Incontinence <sup>3</sup>          | SUS-APC | Derived | Diagnosis flags were derived based on ICD-10 codes in the diagnosis fields for each episode.<br>Coded as 1 (yes) if there was any record of the condition in the patient's hospital admissions in 3 years before the index date.                                                                                                                                                                                 |
| Diagnoses | f_mobprob_h36        | Mobility problems <sup>3</sup>     | SUS-APC | Derived | Diagnosis flags were derived based on ICD-10 codes in the diagnosis fields for each episode.<br>Coded as 1 (yes) if there was any record of the condition in the patient's hospital admissions in 3 years before the index date.                                                                                                                                                                                 |

|                        |                                |                                                                                       |          |         |                                                                                                                                                                                                                                                                                                                                                                                                              |
|------------------------|--------------------------------|---------------------------------------------------------------------------------------|----------|---------|--------------------------------------------------------------------------------------------------------------------------------------------------------------------------------------------------------------------------------------------------------------------------------------------------------------------------------------------------------------------------------------------------------------|
|                        |                                |                                                                                       |          |         | index date.                                                                                                                                                                                                                                                                                                                                                                                                  |
| Diagnoses              | f_pulcers_h36                  | Pressure ulcers <sup>3</sup>                                                          | SUS-APC  | Derived | Diagnosis flags were derived based on ICD-10 codes in the diagnosis fields for each episode.<br>Coded as 1 (yes) if there was any record of the condition in the patient's hospital admissions in 3 years before the index date.                                                                                                                                                                             |
| Healthcare utilisation | adm_el_12h                     | Frequency of elective admissions (1 year history)                                     | SUS-APC  | Derived | Elective admissions were derived based on Admission Method indicating elective admission (codes '11','12','13').<br>Count of elective admissions from continuous in-patient spells in the year before the index date. <sup>1</sup>                                                                                                                                                                           |
| Healthcare utilisation | adm_em_12h                     | Frequency of emergency admissions (1 year history)                                    | SUS-APC  | Derived | Emergency admissions were derived based on Admission Method indicating Emergency Admission (codes '21','22','23','24','25','28','2A','2B','2C','2D').<br>Count of emergency admissions from continuous in-patient spells in the year before the index date. <sup>1</sup>                                                                                                                                     |
| Healthcare utilisation | adm_avoid_12h                  | Frequency of potentially avoidable emergency admissions (1 year history) <sup>4</sup> | SUS-APC  | Derived | Potentially avoidable emergency admissions were defined as emergency admissions (Admission Method codes '21','22','23','24','25','28','2A','2B','2C','2D') with one of a list of conditions as the primary diagnoses for the first episode of the hospital spell.<br>Count of potentially avoidable emergency admissions from continuous in-patient spells in the year before the index date. <sup>1,4</sup> |
| Healthcare utilisation | n_ED_attendances               | Frequency of emergency department attendances (1 year history)                        | SUS-ECDS | Derived | Count of non-duplicate ED attendances in 1 year before the index date                                                                                                                                                                                                                                                                                                                                        |
| Healthcare utilisation | n_ED_attendances_via_ambulance | Frequency of emergency department attendances via ambulance (1 year history)          | SUS-ECDS | Derived | Count of non-duplicate ED attendances that were via ambulance (as indicated by presence of codes 104803100000010, 1048021000000102, 1048041000000109, 1048051000000107 in field EC_Arrival_Mode_SNOMED_CT) in 1 year before the index date                                                                                                                                                                   |
| Healthcare utilisation | n_out_of_hours_ED_attendances  | Frequency of emergency department                                                     | SUS-ECDS | Derived | Count of non-duplicate ED attendances that occurred after 1800 or before 0800 hours in 1 year before the index date                                                                                                                                                                                                                                                                                          |

|                        |                            |                                                                                           |          |         |                                                                                                                                                                                                                                          |
|------------------------|----------------------------|-------------------------------------------------------------------------------------------|----------|---------|------------------------------------------------------------------------------------------------------------------------------------------------------------------------------------------------------------------------------------------|
|                        |                            | attendances after 6pm/ before 8am (1 year history)                                        |          |         |                                                                                                                                                                                                                                          |
| Healthcare utilisation | n_long_ED_attendances      | Frequency of emergency department attendances lasting more than 12 hours (1 year history) | SUS-ECDS | Derived | Count of non-duplicate ED attendances that lasted more than 12 hours in duration in 1 year before the index date                                                                                                                         |
| Healthcare utilisation | n_ED_attendances_for_falls | Frequency of emergency department attendances due to a fall (1 year history)              | SUS-ECDS | Derived | Count of non-duplicate ED attendances that were for falls (as indicated by presence of codes 161898004, 430576002, 54670004, 75941004, 240871000000104, 429482004 in field EC_Chief_Complaint_SNOMED_CT) in 1 year before the index date |
| Healthcare utilisation | n_OP_appts                 | Frequency of outpatient appointments (1 year history)                                     | SUS-OP   | Derived | Count of non-duplicate outpatient appointments in 1 year before index date                                                                                                                                                               |
| Healthcare utilisation | n_cs_appts                 | Frequency of community services appointments (1 year history)                             | CSDS     | Derived | Count of community service appointments in 1 year before the index date                                                                                                                                                                  |
| Healthcare utilisation | n_missed_OP_appts          | Frequency of missed outpatient appointments (1 year history)                              | SUS-OP   | Derived | Count of non-duplicate appointments that were missed (as indicated by presence of codes 0, 1, 3 in field Attendance_Status) in 1 year before the index date                                                                              |
| Healthcare utilisation | n_cs_appts_continance      | Frequency of continence appointments (1 year history)                                     | CSDS     | Derived | Count of continence community service appointments (as indicated by Referral_TeamType =07) in 1 year before the index date                                                                                                               |
| Healthcare utilisation | n_cs_appts_dh              | Frequency of district nursing appointments (1 year history)                               | CSDS     | Derived | Count of district nursing community service appointments (as indicated by Referral_TeamType =12) in 1 year before the index date                                                                                                         |

|                        |                     |                                                                            |      |         |                                                                                                                                                            |
|------------------------|---------------------|----------------------------------------------------------------------------|------|---------|------------------------------------------------------------------------------------------------------------------------------------------------------------|
| Healthcare utilisation | n_cs_appts_podiatry | Frequency of podiatry appointments (1 year history)                        | CSDS | Derived | Count of podiatry community service appointments (as indicated by Referral_TeamType =27) in 1 year before the index date                                   |
| Healthcare utilisation | n_cs_appts_rehab    | Frequency of community rehabilitation appointments (1 year history)        | CSDS | Derived | Count of community rehabilitation community service appointments (as indicated by Referral_TeamType =29) in 1 year before the index date                   |
| Healthcare utilisation | n_cs_appts_SALT     | Frequency of speech and language therapy appointments (1 year history)     | CSDS | Derived | Count of SALT community service appointments (as indicated by Referral_TeamType =33) in 1 year before the index date                                       |
| Healthcare utilisation | n_cs_f2f_appts      | Frequency of face to face community services appointments (1 year history) | CSDS | Derived | Count of face to face community service appointments (as indicated by presence of code 1 in field Consultation_MethodUsed) in 1 year before the index date |
| Healthcare utilisation | n_cs_missed_appts   | Frequency of missed community services appointments (1 year                | CSDS | Derived | Count of missed community service appointments (as indicated by presence of codes 2, 3, 7 in field AttendanceStatus) in 1 year before the index date       |

|                                                         |                                |                                                                                   |                     |         |                                                                                                                      |
|---------------------------------------------------------|--------------------------------|-----------------------------------------------------------------------------------|---------------------|---------|----------------------------------------------------------------------------------------------------------------------|
|                                                         |                                | history)                                                                          |                     |         |                                                                                                                      |
| Healthcare utilisation                                  | n_cs_services                  | Number of community services seen (1 year history)                                | CSDS                | Derived | Count of community service teams seen in 1 year before the index date                                                |
| Healthcare utilisation                                  | n_ambulance_call_outs_5m       | Frequency of ambulance call outs (1 June-31 October 2023)                         | Ambulance           | Derived | Count of ambulance call outs between 1 June 2023 and 31 October 2023                                                 |
| Healthcare utilisation                                  | n_ambulance_attendances_5m     | Frequency of ambulance attendances (1 June-31 October 2023)                       | Ambulance           | Derived | Count of ambulance attendances between 1 June 2023 and 31 October 2023                                               |
| Healthcare utilisation                                  | n_ambulance_attendances_OOH_5m | Frequency of ambulance attendances after 6pm/ before 8am (1 June-31 October 2023) | Ambulance           | Derived | Count of ambulance attendances that occurred after 1800 or before 0800 hours between 1 June 2023 and 31 October 2023 |
| Healthcare utilisation                                  | n_ambulance_conveyances_5m     | Frequency of ambulance conveyances (1 June-31 October 2023)                       | Ambulance           | Derived | Count of ambulance conveyances between 1 June 2023 and 31 October 2023                                               |
| Care home characteristics and workforce characteristics | Der_CQC_Service_Type_CHR       | Service type                                                                      | Care home residency | Raw     | NA                                                                                                                   |
| Care home characteristics and workforce characteristics | registered_bed_capacity        | Registered bed capacity                                                           | CQC                 | Derived | Numeric converted into categorical variable                                                                          |
| Care home characteristics and workforce characteristics | Rating_overall                 | CQC rating (overall)                                                              | CQC                 | Raw     | NA                                                                                                                   |
| Care home characteristics and workforce characteristics | service_reg_yrs                | Years since registration with CQC                                                 | CQC                 | Derived | Numeric converted into categorical variable                                                                          |
| Care home characteristics and workforce characteristics | Q3_1_4                         | Number of beds                                                                    | Care home survey    | Raw     | NA                                                                                                                   |
| Care home characteristics and workforce characteristics | Q3_2_4                         | Number of beds currently occupied                                                 | Care home survey    | Raw     | NA                                                                                                                   |

|                                                         |         |                                        |                  |     |    |
|---------------------------------------------------------|---------|----------------------------------------|------------------|-----|----|
| Care home characteristics and workforce characteristics | Q3_3_4  | Number of resident fully self-funding  | Care home survey | Raw | NA |
| Care home characteristics and workforce characteristics | Q3_4_4  | Number of staff                        | Care home survey | Raw | NA |
| Care home characteristics and workforce characteristics | Q3_5_4  | Number of full-time staff              | Care home survey | Raw | NA |
| Care home characteristics and workforce characteristics | Q3_6_4  | Number of part-time staff              | Care home survey | Raw | NA |
| Care home characteristics and workforce characteristics | Q3_7_4  | Number of staff on permanent contracts | Care home survey | Raw | NA |
| Care home characteristics and workforce characteristics | Q3_8_4  | Number of staff vacancies              | Care home survey | Raw | NA |
| Care home characteristics and workforce characteristics | Q3_9_4  | Number of agency staff                 | Care home survey | Raw | NA |
| Care home characteristics and workforce characteristics | Q3_10_4 | Number of care workers                 | Care home survey | Raw | NA |
| Care home characteristics and workforce characteristics | Q3_11_4 | Number of senior care workers          | Care home survey | Raw | NA |
| Care home characteristics and workforce characteristics | Q3_13_4 | Number of registered nurses            | Care home survey | Raw | NA |
| Care home characteristics and workforce characteristics | Q3_12_4 | Number of nursing associates           | Care home survey | Raw | NA |
| Care home characteristics and workforce characteristics | Q3_14_4 | Number of nursing assistants           | Care home survey | Raw | NA |
| Care home characteristics and workforce characteristics | Q3_15_4 | Number of allied health professionals  | Care home survey | Raw | NA |

|                                                         |         |                                                       |                  |     |    |
|---------------------------------------------------------|---------|-------------------------------------------------------|------------------|-----|----|
| Care home characteristics and workforce characteristics | Q3_16_4 | Number of activities coordinators                     | Care home survey | Raw | NA |
| Care home characteristics and workforce characteristics | Q3_17_4 | Number of staff in roles above on permanent contracts | Care home survey | Raw | NA |
| Care home characteristics and workforce characteristics | Q3_18_4 | Number of staff vacancies in roles above              | Care home survey | Raw | NA |
| Care home characteristics and workforce characteristics | Q3_19_4 | Number of agency staff in roles above                 | Care home survey | Raw | NA |

<sup>1</sup> Continuous in-patient spells (CIPS) (sequence of spells from patient's first admission to hospital to patient final discharge home, including transfers to other hospitals as part of patient's care) were derived by grouping episodes with the same patient, provider and admission date (or previous episode end date the same as the following episode start date).

<sup>2</sup> From the list of Elixhauser conditions (Elixhauser et al. 1998; Quan et al. 2005)

<sup>3</sup> From a validated list of frailty syndromes (Soong J, Poots AJ, Scott S, et al. Developing and validating a risk prediction model for acute care based on frailty syndromes. *BMJ Open*. 2015;5. doi: 10.1136/BMJOPEN-2015-008457)

<sup>4</sup> Potentially avoidable emergency admissions (Care Quality Commission. 2013).

**Table b: data specification for cleaned datasets**

| Dataset  | Domain                 | Variable name                  | Description                |
|----------|------------------------|--------------------------------|----------------------------|
| ALL      | Linkage                | pseudonhsno                    | Pseudonymised NHS number   |
| SUS-APCE | Healthcare utilization | Generated_Record_ID            | Generated Record ID        |
| SUS-APCE | Healthcare utilization | Der_Postcode_LSOA_Code         | LSOA code                  |
| SUS-APCE | Healthcare utilization | GP_Practice_Code               | GP practice code           |
| SUS-APCE | Healthcare utilization | Der_Postcode_CCG_Code          | CCG code                   |
| SUS-APCE | Healthcare utilization | Der_Financial_Year             | Financial year             |
| SUS-APCE | Healthcare utilization | Der_Activity_Month             | Activity month             |
| SUS-APCE | Healthcare utilization | Admission_Date                 | Admission date             |
| SUS-APCE | Healthcare utilization | Admission_Time                 | Admission time             |
| SUS-APCE | Healthcare utilization | Admission_Method               | Admission method           |
| SUS-APCE | Healthcare utilization | Source_of_Admission            | Source of admission        |
| SUS-APCE | Healthcare utilization | Administrative_Category        | Administrative category    |
| SUS-APCE | Healthcare utilization | Discharge_Date                 | Discharge date             |
| SUS-APCE | Healthcare utilization | Discharge_Time                 | Discharge time             |
| SUS-APCE | Healthcare utilization | Discharge_Method               | Discharge method           |
| SUS-APCE | Healthcare utilization | Discharge_Destination          | Discharge destination      |
| SUS-APCE | Healthcare utilization | Der_Provider_Code              | Provider code              |
| SUS-APCE | Diagnoses              | Der_Diagnosis_Count            | Count of diagnosis codes   |
| SUS-APCE | Diagnoses              | Der_Primary_Diagnosis_Code     | Primary diagnosis code     |
| SUS-APCE | Diagnoses              | Der_Secondary_Diagnosis_Code_1 | Secondary diagnosis code 1 |
| SUS-APCE | Diagnoses              | Der_Secondary_Diagnosis_Code_2 | Secondary Diagnosis Code 2 |
| SUS-APCE | Diagnoses              | Der_Secondary_Diagnosis_Code_3 | Secondary Diagnosis Code 3 |



|          |           |                                 |                             |
|----------|-----------|---------------------------------|-----------------------------|
| SUS-APCE | Diagnoses | Der_Secondary_Diagnosis_Code_4  | Secondary Diagnosis Code 4  |
| SUS-APCE | Diagnoses | Der_Secondary_Diagnosis_Code_5  | Secondary Diagnosis Code 5  |
| SUS-APCE | Diagnoses | Der_Secondary_Diagnosis_Code_6  | Secondary Diagnosis Code 6  |
| SUS-APCE | Diagnoses | Der_Secondary_Diagnosis_Code_7  | Secondary Diagnosis Code 7  |
| SUS-APCE | Diagnoses | Der_Secondary_Diagnosis_Code_8  | Secondary Diagnosis Code 8  |
| SUS-APCE | Diagnoses | Der_Secondary_Diagnosis_Code_9  | Secondary Diagnosis Code 9  |
| SUS-APCE | Diagnoses | Der_Secondary_Diagnosis_Code_10 | Secondary Diagnosis Code 10 |
| SUS-APCE | Diagnoses | Der_Secondary_Diagnosis_Code_11 | Secondary Diagnosis Code 11 |
| SUS-APCE | Diagnoses | Der_Secondary_Diagnosis_Code_12 | Secondary Diagnosis Code 12 |
| SUS-APCE | Diagnoses | Der_Secondary_Diagnosis_Code_13 | Secondary Diagnosis Code 13 |
| SUS-APCE | Diagnoses | Der_Secondary_Diagnosis_Code_14 | Secondary Diagnosis Code 14 |
| SUS-APCE | Diagnoses | Der_Secondary_Diagnosis_Code_15 | Secondary Diagnosis Code 15 |
| SUS-APCE | Diagnoses | Der_Secondary_Diagnosis_Code_16 | Secondary Diagnosis Code 16 |
| SUS-APCE | Diagnoses | Der_Secondary_Diagnosis_Code_17 | Secondary Diagnosis Code 17 |
| SUS-APCE | Diagnoses | Der_Secondary_Diagnosis_Code_18 | Secondary Diagnosis Code 18 |
| SUS-APCE | Diagnoses | Der_Secondary_Diagnosis_Code_19 | Secondary Diagnosis Code 19 |

|          |                              |                                          |                                                       |
|----------|------------------------------|------------------------------------------|-------------------------------------------------------|
| SUS-APCE | Diagnoses                    | Der_Secondary_Diagnosis_Code_20          | Secondary Diagnosis Code 20                           |
| SUS-APCE | Diagnoses                    | Der_Secondary_Diagnosis_Code_21          | Secondary Diagnosis Code 21                           |
| SUS-APCE | Diagnoses                    | Der_Secondary_Diagnosis_Code_22          | Secondary Diagnosis Code 22                           |
| SUS-APCE | Diagnoses                    | Der_Secondary_Diagnosis_Code_23          | Secondary Diagnosis Code 23                           |
| SUS-APCE | Diagnoses                    | Der_Diagnosis_All                        | All diagnosis codes                                   |
| SUS-APCE | Healthcare utilization       | Treatment_Function_Code                  | Treatment function code                               |
| SUS-APCE | Healthcare utilization       | Main_Speciality_Code                     | Main speciality code                                  |
| SUS-APCE | Healthcare utilization       | Patient_Classification                   | Patient classification                                |
| SUS-APCE | Healthcare utilization       | Episode_Start_Date                       | Episode Start Date                                    |
| SUS-APCE | Healthcare utilization       | Episode_End_Date                         | Episode End Date                                      |
| SUS-APCE | Healthcare utilization       | Der_Episode_Number                       | Episode Number                                        |
| SUS-APCE | Healthcare utilization       | Der_Spell_ID                             | Spell ID                                              |
| SUS-APCE | Demographics/characteristics | Month_of_Birth_SUS                       | Month of birth                                        |
| SUS-APCE | Demographics/characteristics | Year_of_Birth_SUS                        | Year of birth                                         |
| SUS-APCE | Demographics/characteristics | Sex                                      | Sex                                                   |
| SUS-APCE | Demographics/characteristics | Ethnic_Group                             | Ethnicity                                             |
| SUS-ECDS | Healthcare utilization       | Arrival_Date                             | Date of arrival                                       |
| SUS-ECDS | Healthcare utilization       | Arrival_Time                             | Time of arrival                                       |
| SUS-ECDS | Healthcare utilization       | EC_Treatment_Date_01                     | Date of treatment                                     |
| SUS-ECDS | Healthcare utilization       | EC_Seen_For_Treatment_Time_Since_Arrival | Waiting time from arrival to being seen for treatment |
| SUS-ECDS | Healthcare utilization       | EC_Departure_Date                        | Date of departure                                     |
| SUS-ECDS | Healthcare utilization       | EC_Departure_Time                        | Time of departure                                     |
| SUS-ECDS | Healthcare utilization       | Der_EC_Duration                          | Duration of the A&E attendance                        |
| SUS-ECDS | Healthcare utilization       | Der_Activity_Month                       | Activity month                                        |
| SUS-ECDS | Healthcare utilization       | Generated_Record_ID                      | Generated Record ID                                   |

|          |                              |                                 |                                    |
|----------|------------------------------|---------------------------------|------------------------------------|
| SUS-ECDS | Healthcare utilization       | Provider_Code                   | Provider code                      |
| SUS-ECDS | Healthcare utilization       | EC_Department_Type              | Department type                    |
| SUS-ECDS | Healthcare utilization       | Der_Postcode_LSOA_2011_Code     | LSOA code                          |
| SUS-ECDS | Healthcare utilization       | Der_Postcode_CCG_Code           | CCG code                           |
| SUS-ECDS | Healthcare utilization       | GP_Practice_Code                | GP practice code                   |
| SUS-ECDS | Healthcare utilization       | Accommodation_Status_SNOMED_CT  | Accommodation status (SNOMED CT)   |
| SUS-ECDS | Healthcare utilization       | EC_AttendanceCategory           | Attendance category (SNOMED CT)    |
| SUS-ECDS | Healthcare utilization       | EC_Arrival_Mode_SNOMED_CT       | Arrival mode (SNOMED CT)           |
| SUS-ECDS | Healthcare utilization       | EC_Attendance_Number            | Attendance number (SNOMED CT)      |
| SUS-ECDS | Healthcare utilization       | Discharge_Destination_SNOMED_CT | Discharge destination (SNOMED CT)  |
| SUS-ECDS | Healthcare utilization       | Discharge_Follow_Up_SNOMED_CT   | Discharge follow up (SNOMED CT)    |
| SUS-ECDS | Healthcare utilization       | EC_Acuity_SNOMED_CT             | Acuity (SNOMED CT)                 |
| SUS-ECDS | Healthcare utilization       | EC_Attendance_Source_SNOMED_CT  | Attendance source (SNOMED CT)      |
| SUS-ECDS | Healthcare utilization       | EC_Discharge_Status_SNOMED_CT   | Discharge status (SNOMED CT)       |
| SUS-ECDS | Complications/adverse events | EC_Chief_Complaint_SNOMED_CT    | Chief Complaint (SNOMED CT)        |
| SUS-ECDS | Complications/adverse events | EC_Diagnosis_01                 | Primary diagnosis (SNOMED CT)      |
| SUS-ECDS | Healthcare utilization       | EC_Treatment_01                 | Primary treatment code (SNOMED CT) |
| SUS-ECDS | Complications/adverse events | Der_EC_Diagnosis_All            | All diagnosis codes (SNOMED CT)    |
| SUS-ECDS | Resident needs               | Der_EC_Treatment_All            | All treatment codes (SNOMED CT)    |
| SUS-ECDS | Complications/adverse events | EC_Injury_Date                  | Injury date                        |
| SUS-ECDS | Complications/adverse events | EC_Injury_Time                  | Injury time                        |

|          |                              |                                    |                                                                                    |
|----------|------------------------------|------------------------------------|------------------------------------------------------------------------------------|
| SUS-ECDS | Complications/adverse events | EC_Injury_Activity_Status_SNOMED   | Injury activity status (SNOMED CT)                                                 |
| SUS-ECDS | Complications/adverse events | EC_Injury_Activity_Type_SNOMED_C   | Injury activity type (SNOMED CT)                                                   |
| SUS-ECDS | Complications/adverse events | EC_Injury_Intent_SNOMED_CT         | Injury intent (SNOMED CT)                                                          |
| SUS-ECDS | Complications/adverse events | EC_Injury_Mechanism_SNOMED_CT      | Injury mechanism (SNOMED CT)                                                       |
| SUS-ECDS | Complications/adverse events | EC_Place_Of_Injury_SNOMED_CT       | Place of injury (SNOMED CT)                                                        |
| SUS-ECDS | Complications/adverse events | AEA_Diagnosis_01                   | Primary diagnosis code (AEA code)                                                  |
| SUS-ECDS | Healthcare utilization       | AEA_Treatment_01                   | Primary treatment code (AEA code)                                                  |
| SUS-ECDS | Complications/adverse events | Der_AEA_Diagnosis_All              | All diagnosis codes (AEA codes)                                                    |
| SUS-ECDS | Resident needs               | Der_AEA_Treatment_All              | All treatment codes (AEA codes)                                                    |
| SUS-ECDS | Healthcare utilization       | Org_Code_Patient_Pathway_ID_Issuer | Organisation code of the organisation that assigned the patient pathway identifier |
| SUS-ECDS | Demographics/characteristics | Month_of_Birth                     | Month of birth                                                                     |
| SUS-ECDS | Demographics/characteristics | Year_of_Birth                      | Year of birth                                                                      |
| SUS-ECDS | Demographics/characteristics | Sex                                | Sex                                                                                |
| SUS-ECDS | Demographics/characteristics | Ethnic_Category                    | Ethnicity                                                                          |
| SUS-OP   | Healthcare utilization       | Appointment_Date                   | Appointment date                                                                   |
| SUS-OP   | Healthcare utilization       | Appointment_Time                   | Appointment time                                                                   |
| SUS-OP   | Healthcare utilization       | Der_Activity_Month                 | Activity month                                                                     |
| SUS-OP   | Healthcare utilization       | Der_Financial_Year                 | Financial year                                                                     |
| SUS-OP   | Healthcare utilization       | Der_Provider_Code                  | Provider code                                                                      |
| SUS-OP   | Healthcare utilization       | Der_Postcode_LSOA_Code             | LSOA code                                                                          |
| SUS-OP   | Healthcare utilization       | Der_Postcode_CCG_Code              | CCG code                                                                           |
| SUS-OP   | Healthcare utilization       | GP_Practice_Code                   | GP practice code                                                                   |

|                                                  |                                                         |                         |                                                                    |
|--------------------------------------------------|---------------------------------------------------------|-------------------------|--------------------------------------------------------------------|
| SUS-OP                                           | Healthcare utilization                                  | Der_Appointment_Type    | Appointment type                                                   |
| SUS-OP                                           | Healthcare utilization                                  | Der_Attendance_Type     | Attendance type                                                    |
| SUS-OP                                           | Healthcare utilization                                  | Attendance_Status       | Attendance status                                                  |
| SUS-OP                                           | Healthcare utilization                                  | OPA_Referral_Source     | Source of referral for the outpatient episode                      |
| SUS-OP                                           | Healthcare utilization                                  | Treatment_Function_Code | Treatment function code                                            |
| SUS-OP                                           | Healthcare utilization                                  | Main_Speciality_Code    | Main speciality code                                               |
| SUS-OP                                           | Resident needs                                          | Der_Procedure_All       | All procedure codes                                                |
| SUS-OP                                           | Demographics/characteristics                            | Month_of_Birth_SUS      | Month of birth                                                     |
| SUS-OP                                           | Demographics/characteristics                            | Year_of_Birth_SUS       | Year of birth                                                      |
| SUS-OP                                           | Demographics/characteristics                            | Sex                     | Sex                                                                |
| SUS-OP                                           | Demographics/characteristics                            | Ethnic_Category         | Ethnicity                                                          |
| PDS                                              | Demographics/characteristics                            | Der_Practice_Code       | GP practice code                                                   |
| PDS                                              | Demographics/characteristics                            | Der_CCGofResidence      | CCG code for residence location                                    |
| PDS                                              | Demographics/characteristics                            | Gender                  | Sex                                                                |
| PDS                                              | Demographics/characteristics                            | DateofDeath             | Date of death                                                      |
| PDS                                              | Demographics/characteristics                            | Der_Postcode_LSOA_code  | LSOA of residence                                                  |
| PDS                                              | Demographics/characteristics                            | Der_DOBYearMnth         | Year and month of birth                                            |
| PDS                                              | Demographics/characteristics                            | Change_Time_Stamp       | Date and time to indicate when record was updated (for any column) |
| Care home residency <sup>1</sup> and CQC dataset | Linkage                                                 | Der_CQC_Location        | Pseudonymised CQC location id                                      |
| Care home residency                              | Care home stay                                          | Der_Start_Date          | Start of care home stay                                            |
| Care home residency                              | Care home stay                                          | Der_End_Date            | End of care home stay                                              |
| Care home residency                              | Care home characteristics and workforce characteristics | Der_CQC_Service_Type    | Type of care home                                                  |
| Care home residency                              | Demographics/characteristics                            | CCG_Of_Residence        | CCG of care home                                                   |
| Care home residency                              | Care home characteristics and workforce characteristics | CareHomeIndicator       | ? Unclear                                                          |
| Care home residency                              | Care home stay                                          | DeathFlag               | Flag to indicate resident died                                     |

|                     |                              |                                  |                                                                                                                                                       |
|---------------------|------------------------------|----------------------------------|-------------------------------------------------------------------------------------------------------------------------------------------------------|
| Care home residency | Care home stay               | YearMonthDeath_YYYYMM            | Year and month of death                                                                                                                               |
| Care home residency | Care home stay               | DeathInHospFlag                  | Flag to indicate death in hospital                                                                                                                    |
| Care home residency | Care home stay               | LastResidencyFlag                | Flag to indicate last residence of the person                                                                                                         |
| Ambulance           | Healthcare utilization       | call_date                        | Date of call                                                                                                                                          |
| Ambulance           | Healthcare utilization       | call_origin                      | Codes to identify the origin of the call into the ambulance control room, whether 999 was directly dialled or it was transferred from another agency. |
| Ambulance           | Healthcare utilization       | stop_codes                       | Codes to identify the reason the call was closed if no face to face response was received from the ambulance service.                                 |
| Ambulance           | Healthcare utilization       | time_call_connected              | Time call connected                                                                                                                                   |
| Ambulance           | Healthcare utilization       | time_call_answered               | Time call answered                                                                                                                                    |
| Ambulance           | Healthcare utilization       | treatment_type                   | Codes to identify the overall outcome of the call.                                                                                                    |
| Ambulance           | Healthcare utilization       | chief_complaint_call_triage_code | Codes to identify the initial chief complaint of the patient based on the information provided during telephone call to the ambulance control room.   |
| Ambulance           | Healthcare utilization       | orgid_prov3                      | Provider code 3 characters                                                                                                                            |
| Ambulance           | Healthcare utilization       | time_resource_arrived_on_scene   | Time resource arrived on scene                                                                                                                        |
| Ambulance           | Healthcare utilization       | receiving_location_type_cad      | ? Unclear                                                                                                                                             |
| ASC CLD             | Care home stay               | Accommodation_Status_ASC         | Accommodation status                                                                                                                                  |
| ASC CLD             | Care home stay               | Client_Funding_Status_ASC        | Client funding status                                                                                                                                 |
| ASC CLD             | Care home stay               | Service_Component_ASC            | Service component                                                                                                                                     |
| ASC CLD             | Care home stay               | Service_Type_ASC                 | Service type                                                                                                                                          |
| CSDS (CYP001MPI)    | Demographics/characteristics | Gender                           | Person stated gender code or Sex                                                                                                                      |
| CSDS (CYP001MPI)    | Demographics/characteristics | EthnicCategory                   | Ethnic category                                                                                                                                       |
| CSDS (all files)    | Healthcare utilization       | EFFECTIVE_FROM                   | Date and time to indicate when record was updated (for any column)                                                                                    |
| CSDS (all files)    | Healthcare utilization       | RecordNumber                     | Record number                                                                                                                                         |
| CSDS (CYP001MPI)    | Healthcare utilization       | LSOA                             | LSOA code                                                                                                                                             |

|                                    |                              |                                         |                                                          |
|------------------------------------|------------------------------|-----------------------------------------|----------------------------------------------------------|
| CSDS (CYP001MPI)                   | Healthcare utilization       | Der_Postcode_yr2011_LSOA                | LSOA code                                                |
| CSDS (CYP001MPI)                   | Demographics/characteristics | AgeYr_RP_StartDate                      | Age of patient at reporting period start (days)          |
| CSDS (CYP001MPI)                   | Care home stay               | AgeYr_Death                             | Age at death (years)                                     |
| CSDS (CYP001MPI)                   | Care home stay               | Age_Death                               | Age at death (days)                                      |
| CSDS (CYP001MPI)                   | Healthcare utilization       | OrgIDICBRes                             | Organisation identifier (ICB of residence)               |
| CSDS (CYP001MPI)                   | Palliative care needs        | DiscussPreferredDeathLocation_Indicator | Preferred death location discussed indicator             |
| CSDS (CYP001MPI)                   | Palliative care needs        | DeathLocationPreferred_Type             | Death location type code (preferred)                     |
| CSDS (CYP001MPI)                   | Palliative care needs        | DeathLocationActual_Type                | Death location type code (actual)                        |
| CSDS (CYP001MPI)                   | Palliative care needs        | NotAtPreferredLocation_Reason           | Death not at preferred location reason                   |
| CSDS (CYP201CareContact)           | Healthcare utilization       | CareContactID                           | Care contact identifier                                  |
| CSDS (CYP201CareContact)           | Healthcare utilization       | ServiceRequestID                        | Service request identifier                               |
| CSDS (CYP201CareContact)           | Healthcare utilization       | Contact_Date                            | Care contact date                                        |
| CSDS (CYP201CareContact)           | Healthcare utilization       | Consultation_Type                       | Consultation type                                        |
| CSDS (CYP201CareContact)           | Healthcare utilization       | Consultation_MediumUsed                 | Consultation mechanism e.g. face to face                 |
| CSDS (CYP201CareContact)           | Healthcare utilization       | Activity_LocationType                   | Activity location type code                              |
| CSDS (CYP201CareContact)           | Healthcare utilization       | OrgID_Provider                          | Organisation identifier (code of provider)               |
| CSDS (CYP201CareContact)           | Healthcare utilization       | AgeYr_Contact_Date                      | Age at care contact date                                 |
| CSDS (CYP201CareContact)           | Healthcare utilization       | AttendanceStatus                        | Attendance status                                        |
| CSDS (CYP101Referral)              | Healthcare utilization       | SourceOfReferral                        | Source of referral                                       |
| CSDS (CYP101Referral)              | Healthcare utilization       | Referring_StaffGroup                    | Referring care professional staff group (community care) |
| CSDS (CYP101Referral)              | Healthcare utilization       | PrimaryReferralReason                   | Primary reason for referral (community care)             |
| CSDS (CYP102ServiceTypeReferredTo) | Healthcare utilization       | ServiceRequestID                        | Service request identifier                               |
| CSDS (CYP102ServiceTypeReferredTo) | Healthcare utilization       | TeamID_Local                            | Care professional team local identifier                  |
| CSDS                               | Healthcare utilization       | TeamType                                | Service or team type referred to (community care)        |

|                               |                                                         |                                      |                                   |
|-------------------------------|---------------------------------------------------------|--------------------------------------|-----------------------------------|
| (CYP102ServiceTypeReferredTo) |                                                         |                                      |                                   |
| CQC                           | Care home characteristics and workforce characteristics | Location_HSCA_start_date             | Start of registration at location |
| CQC                           | Care home characteristics and workforce characteristics | Care_home?                           | Care home or not                  |
| CQC                           | Care home characteristics and workforce characteristics | Care_homes_beds                      | Number of beds                    |
| CQC                           | Care home characteristics and workforce characteristics | Location_Inspection_Directorate      | Inspection Directorate            |
| CQC                           | Care home characteristics and workforce characteristics | Location_Primary_Inspection_Category | Primary inspection category       |
| CQC                           | Care home characteristics and workforce characteristics | Publication_Date                     | Publication date                  |
| CQC                           | Care home characteristics and workforce characteristics | Location_Region                      | Region                            |
| CQC                           | Care home characteristics and workforce characteristics | Location_NHS_Region                  | NHS Region                        |
| CQC                           | Care home characteristics and workforce characteristics | Location_Local_Authority             | Location Authority                |
| CQC                           | Care home characteristics and workforce characteristics | Location_ONSPD_CCG                   | CCG                               |
| CQC                           | Care home characteristics and workforce characteristics | service_type                         | Service type e.g. nursing home    |
| CQC                           | Care home characteristics and workforce characteristics | Location_Type                        | Location type                     |
| CQC                           | Care home characteristics and workforce characteristics | Rating_overall                       | Rating: overall                   |



|     |                                                         |                          |                             |
|-----|---------------------------------------------------------|--------------------------|-----------------------------|
| CQC | Care home characteristics and workforce characteristics | Rating_caring            | Rating: caring              |
| CQC | Care home characteristics and workforce characteristics | Rating_well_led          | Rating: well led            |
| CQC | Care home characteristics and workforce characteristics | Rating_effective         | Rating: effective           |
| CQC | Care home characteristics and workforce characteristics | Rating_reponsive         | Rating: responsive          |
| CQC | Care home characteristics and workforce characteristics | Rating_safe              | Rating: safe                |
| CQC | Care home characteristics and workforce characteristics | serv_user_dementia       | Service users with dementia |
| CQC | Care home characteristics and workforce characteristics | years_since_registration | Years since registration    |

## APPENDIX 6 – Completion of measures added into care home digital care record software, by wave, for linked DCR data\*

| Measure                 | N   | i.<br>Complete<br>both | ii.<br>Wave<br>1 only | iii.<br>Wave<br>2 only | iv.<br>Missing<br>both <sup>1</sup> | Of ii...                          | Of ii...                                                     |
|-------------------------|-----|------------------------|-----------------------|------------------------|-------------------------------------|-----------------------------------|--------------------------------------------------------------|
|                         |     |                        |                       |                        |                                     | Resident<br>died before<br>Wave 2 | care<br>home<br>drop out<br>or non-<br>complete <sup>1</sup> |
| MDS CPS                 | 767 | 58.7%                  | 21.1%                 | 2.4%                   | 17.8%                               | 27.8%                             | 45.7%                                                        |
| Barthel                 | 767 | 35.2%                  | 38.6%                 | 1.6%                   | 24.6%                               | 16.2%                             | § 78.7%                                                      |
| IAGeD                   | 767 | 55.3%                  | 20.6%                 | 4.0%                   | 20.1%                               | 26.6%                             | 46.8%                                                        |
| ASCOT-Proxy-Resident    | 767 | 44.7%                  | 18.9%                 | 4.0%                   | 32.3%                               | 27.6%                             | 46.2%                                                        |
| ASCOT: Anxiety/low mood | 767 | 44.9%                  | 18.9%                 | 6.5%                   | 29.7%                               | 31.7%                             | 51.0%                                                        |
| ASCOT: Pain             | 767 | 51.4%                  | 20.7%                 | 2.6%                   | 25.3%                               | 29.6%                             | 49.1%                                                        |
| ICECAP-O                | 767 | 36.6%                  | 37.6%                 | 1.3%                   | 24.5%                               | 18.8%                             | §§ 76.0%                                                     |
| EQ-5D-5L Proxy          | 767 | 60.5%                  | 21.8%                 | 2.4%                   | 15.4%                               | 28.1%                             | 44.9%                                                        |
| ASCS QoL item           | 767 | 56.6%                  | 21.1%                 | 2.2%                   | 20.1%                               | 29.0%                             | 48.8%                                                        |

\*Since data on resident death between waves or grouping by care home were only available once the DCR data had been linked to other data, we only consider those residents who were eligible for data linkage, but do not omit residents with data at Wave 2 only (see Figure 1, ).

<sup>1</sup> Due to drop out of n=5 care homes from Wave 1 to Wave 2, except when noted below (under § and §§).

§ Eleven additional care homes (**Provider 2 only**) returned no Barthel data at Wave 2 (n=157 (53.0%)). No additional information given as to why.

§§ Five additional care homes (**Provider 2 only**) returned no ICECAP-O data at Wave 2, although care staff completed other measures (n=96 (33.3%)). Despite a request for additional information, no reason was given for this omission.

## APPENDIX 7: GP data items possible to access from one ICS

| Type                | Variable                                                    |
|---------------------|-------------------------------------------------------------|
| Demographics        | Ethnicity                                                   |
| Demographics        | BMI                                                         |
| Demographics        | Age in Years                                                |
| Demographics        | Has died Y/N /month and year of death                       |
| Demographics        | Care home flag in GP record and/ or ICS system              |
| Demographics        | Registration with GP practice aligned to care home declined |
| Risk stratification | End-of-life pathway register                                |
| Risk stratification | Place of death discussed                                    |
| Risk stratification | Preferred place of death                                    |
| Risk stratification | Infection - urinary tract                                   |
| Risk stratification | Infection - chest - lower respiratory tract infection       |
| Risk stratification | Infection - skin                                            |
| Risk stratification | Injury resulting from fall                                  |
| Risk stratification | Haematological malignancies                                 |
| Risk stratification | Depression                                                  |
| Risk stratification | Dementia                                                    |
| Risk stratification | Incontinence - fecal                                        |
| Risk stratification | Delirium                                                    |
| Risk stratification | Difficulty swallowing                                       |
| Risk stratification | Frailty index (eFi)                                         |
| Risk stratification | eFI: activity limitation                                    |
| Risk stratification | eFI: anaemia and haematinic deficiency                      |
| Risk stratification | eFI: arthritis                                              |
| Risk stratification | eFI: atrial fibrillation                                    |
| Risk stratification | eFI: cerebrovascular disease                                |
| Risk stratification | eFI: chronic kidney disease (CKD)                           |
| Risk stratification | eFI: diabetes                                               |
| Risk stratification | eFI: dizziness                                              |
| Risk stratification | eFI: dyspnoea                                               |
| Risk stratification | eFI: falls                                                  |
| Risk stratification | eFI: foot problems                                          |
| Risk stratification | eFI: fragility fracture                                     |
| Risk stratification | eFI: hearing impairment                                     |
| Risk stratification | eFI: heart failure                                          |
| Risk stratification | eFI: heart valve disease                                    |
| Risk stratification | eFI: housebound                                             |
| Risk stratification | eFI: hypertension                                           |
| Risk stratification | eFI: hypotension/syncope                                    |
| Risk stratification | eFI Memory & cognitive problems                             |
| Risk stratification | eFI Mobility and transfer problems                          |

|                          |                                                              |
|--------------------------|--------------------------------------------------------------|
| Risk stratification      | eFI: osteoporosis                                            |
| Risk stratification      | eFI: Parkinsonism and tremor                                 |
| Risk stratification      | eFI: peptic ulcer                                            |
| Risk stratification      | eFI: Peripheral vascular disease                             |
| Risk stratification      | eFI: polypharmacy                                            |
| Risk stratification      | eFI: requirement for care                                    |
| Risk stratification      | eFI: respiratory disease                                     |
| Risk stratification      | eFI: skin ulcer                                              |
| Risk stratification      | eFI: sleep disturbance                                       |
| Risk stratification      | eFI: social vulnerability                                    |
| Risk stratification      | eFI: thyroid disease                                         |
| Risk stratification      | eFI: urinary incontinence                                    |
| Risk stratification      | eFI: urinary system disease                                  |
| Risk stratification      | eFI: visual impairment                                       |
| Risk stratification      | eFI: weight loss and anorexia                                |
| Risk stratification      | eFI: ischaemic heart disease                                 |
| Medications              | Numbers of current prescriptions                             |
| Medications              | Most recent medication review                                |
| Medications              | Penicillins (BNF 5.1.1)                                      |
| Medications              | Cephalosporins, carbapenems & other beta-lactams (BNF 5.1.2) |
| Medications              | Tetracyclines (BNF 5.1.3)                                    |
| Medications              | Aminoglycosides (BNF 5.1.4)                                  |
| Medications              | Macrolides (BNF 5.1.5)                                       |
| Medications              | Sulfonamides and trimethoprim (BNF 5.1.8)                    |
| Medications              | Quinolones (BNF 5.1.12)                                      |
| Medications              | Non-opioid analgesics (BNF 4.7.1)                            |
| Medications              | Compound analgesic preparations (BNF 4.7.1)                  |
| Medications              | Opioid analgesics (BNF 4.7.2)                                |
| Medications              | Non-steroidal anti-inflammatory drugs (BNF 10.1.1)           |
| Medications              | Other drugs used as analgesics                               |
| Vaccinations             | Flu                                                          |
| Vaccinations             | Covid 19                                                     |
| Vaccinations             | Pneumonia                                                    |
| Appointments/utilisation | Number of appointments by staff type                         |
| Appointments/utilisation | EHCH MDT referral                                            |
| Appointments/utilisation | Hospital referral recorded?                                  |
| Appointments/utilisation | A&E referral recorded?                                       |
| Appointments/utilisation | Continence service referral recorded?                        |
| Appointments/utilisation | Community services referral recorded?                        |
| Appointments/utilisation | Community nurse referral recorded                            |
| Appointments/utilisation | Referrals to falls service                                   |
| Appointments/utilisation | Face to Face                                                 |

|                          |                        |
|--------------------------|------------------------|
| Appointments/utilisation | Telephone appointments |
|--------------------------|------------------------|

## APPENDIX 8 – Reason for non-inclusion of planned variables in final MDS

| Domain                           | Variable                                             | Expected source                          | Reason for not included/ reason for different source                                                                                                            |
|----------------------------------|------------------------------------------------------|------------------------------------------|-----------------------------------------------------------------------------------------------------------------------------------------------------------------|
| Demographics/<br>characteristics | Date of birth                                        | PDS                                      | Included, but sourced from PDS and SUS                                                                                                                          |
|                                  | Sex registered at birth                              | PDS                                      | Included, but sourced from PDS, SUS, CSDS                                                                                                                       |
|                                  | Religion                                             | DCRs                                     | Included, but high % missing data                                                                                                                               |
|                                  | First language                                       | DCRs                                     | Included, but high % missing data                                                                                                                               |
|                                  | Marital status                                       | DCRs                                     | Included, but high % missing data                                                                                                                               |
|                                  | Ethnicity                                            | DCRs, GP data                            | Included, but high % missing data                                                                                                                               |
|                                  | Weight                                               | data                                     | Included, but sourced from DCRs only                                                                                                                            |
|                                  | Height                                               | DCRs, GP data                            | Included, but sourced from DCRs only                                                                                                                            |
|                                  | Area-based deprivation (last known residence)        | PDS linked to public IMD data            | The version of PDS we accessed did not allow access to location of previous address                                                                             |
| Palliative care needs            | End-of-life pathway register                         | GP data                                  | No access to GP data, but sourced information from CSDS                                                                                                         |
| Care home stay                   | Date of death<br>Admitted from hospital or community | PDS<br>SUS                               | Included, but sourced from PDS and SUS<br>Included, but limited to discharge from hospital to care home in previous year                                        |
| Resident needs                   | Visual impairment                                    | GP data                                  | No access to GP data                                                                                                                                            |
|                                  | Hearing impairment                                   | GP data                                  | No access to GP data                                                                                                                                            |
|                                  | Cognitive impairment                                 | DCRs, GP data, SUS                       | Included, but sourced from DCRs and SUS only                                                                                                                    |
|                                  | Oral and nutritional status                          | GP data, SUS                             | Included, but sourced from SUS only                                                                                                                             |
| Contenance                       | DSRs, GP data                                        | SUS                                      | Included, but sourced from DCRs and SUS only                                                                                                                    |
| Quality of life                  |                                                      |                                          |                                                                                                                                                                 |
| Complications/<br>adverse events | Infections                                           | DCRs, GP data, SUS                       | Included, but sourced from SUS only and limited to upper and lower respiratory tract infections. Not able to extract from DCRs in standardised format.          |
|                                  | Falls leading to GP or hospital visit                | DCRs, GP data, SUS, 999 / ambulance data | Included, but sourced from SUS only. Field in ambulance dataset required to derive this was 100% missing. Not able to extract from DCRs in standardised format. |
|                                  | Falls (recorded in care home only) NEWS2/RESTORE     | DCRs                                     | Not able to extract in standardised format.                                                                                                                     |
|                                  |                                                      | DCRs                                     | Included, but 100% missing                                                                                                                                      |
| Diagnoses                        | Medical history                                      | GP data, SUS                             | Included, but sourced from SUS only                                                                                                                             |
|                                  | Frailty                                              | SUS                                      | Included, but sourced from SUS only                                                                                                                             |
|                                  | Adverse reactions and allergies                      | GP data, SUS                             | No access to GP data                                                                                                                                            |
| Medications/<br>vaccinations     | Prescribed medications                               | GP data                                  | No access to GP data                                                                                                                                            |
|                                  | Administered                                         |                                          |                                                                                                                                                                 |

|                        |                                 |                                    |                                                                                                            |
|------------------------|---------------------------------|------------------------------------|------------------------------------------------------------------------------------------------------------|
|                        | vaccinations                    |                                    |                                                                                                            |
| Healthcare utilisation | Primary care use                | GP data, NHS111, ambulance GP data | Included, but sourced from ambulance data only.                                                            |
|                        | Out of hours contacts           |                                    | No access to GP data. However, we derived out of hours ambulance callouts.                                 |
|                        | Ambulance attendances for falls | Ambulance                          | Field in dataset required to derive this was 100% missing so could not use to get reason for attendances   |
|                        | Ambulance conveyances to ED     |                                    | Field in dataset required to derive this was populated differently to as expected from data specifications |

## APPENDIX 9 - Comparison of variables with inconsistent definitions across data sources

A small number of comorbidities were recorded in both hospital and care home records. However, these variables were not defined in a consistent way. Even within a data source, there can be several established definitions and code lists, which will give slightly different results. Table a shows that 11% of residents in our sample are identified as having dementia from SUS data according to one definition but not another (53 + 13/583).

The comorbidities were also collected differently: variables in the care home data were recorded at one particular point in time - therefore reflecting the resident's health status at that moment. For the SUS data, we collected information relating to these conditions over a three-year look-back period. For acute conditions, there were high levels of discrepancy between SUS and care home DCRs. For example, delirium was recorded in hospital records for 145 patients in the previous 3 years, but only 20 (14%) of these were recorded as delirious by care home staff at the time of recording. However, there were also 30 (48%, 30/62) residents recorded with delirium in the care home DCRs that were not reflected in hospital records prior to that date. For cognitive impairment, which tends to not improve over time, there was more consistency, although still substantial disagreement. Agreement between care home DCR and SUS record of dementia is recorded in Table 3 in main results.

Table a) Comparison of residents identified to have dementia based on Charlson index code list and Frailty syndromes code list

| Comparing dementia prevalence within SUS |         | Frailty syndromes code list |     |         |       |
|------------------------------------------|---------|-----------------------------|-----|---------|-------|
|                                          |         | No                          | Yes | Missing | Total |
| Charlson index code list                 | No      | 189                         | 13  | 0       | 202   |
|                                          | Yes     | 53                          | 328 | 0       | 381   |
|                                          | Missing | 0                           | 0   | 144     | 144   |
|                                          | Total   | 242                         | 341 | 144     | 727   |

Table b) Comparison of residents identified to have delirium based on SUS data using Soong et al. List of frailty syndromes and care home DCR using I-AGED

| Delirium |         | Care home DCR |     |         |       |
|----------|---------|---------------|-----|---------|-------|
|          |         | No            | Yes | Missing | Total |
| SUS      | No      | 270           | 30  | 73      | 373   |
|          | Yes     | 145           | 20  | 45      | 210   |
|          | Missing | 105           | 12  | 27      | 144   |
|          | Total   | 520           | 62  | 145     | 727   |



Table c) Comparison of residents identified to have cognitive impairment based on Soong et al. List of frailty syndromes and care home DCR, assess using Morris et al.

| Cognitive impairment |         | Care home DCR |                   |                 |                     |                              |                  |                        |         |       |
|----------------------|---------|---------------|-------------------|-----------------|---------------------|------------------------------|------------------|------------------------|---------|-------|
|                      |         | Intact        | Borderline intact | Mild impairment | Moderate impairment | Moderately severe impairment | Sever impairment | Very severe impairment | Missing | Total |
| SUS                  | No      | 13            | 52                | 13              | 10                  | 8                            | 7                | 6                      | 17      | 126   |
|                      | Yes     | 33            | 45                | 61              | 84                  | 52                           | 60               | 43                     | 79      | 457   |
|                      | Missing | 10            | 19                | 11              | 17                  | 20                           | 21               | 27                     | 19      | 144   |
|                      | Total   | 56            | 116               | 85              | 111                 | 80                           | 88               | 76                     | 115     | 727   |

Note: 144 people are missing for each of the SUS measures as no inpatient hospital record

**APPENDIX 10 – Complete final prototype MDS. Numbers are reported for 727 residents unless otherwise specified**

| Domain                           | Variable                                             | Categories (if categorical) | n      | Mean (SD) or % |
|----------------------------------|------------------------------------------------------|-----------------------------|--------|----------------|
| Demographics/<br>characteristics | Ethnicity (final) <sup>1</sup>                       | White                       | 692    | 95%            |
|                                  |                                                      | Black or Black British      | <= 5   | NA             |
|                                  |                                                      | Asian or Asian British      | <= 5   | NA             |
|                                  |                                                      | Mixed                       | <= 5   | NA             |
|                                  |                                                      | Other                       | <= 5   | NA             |
|                                  |                                                      | Missing                     | 25     | 3%             |
|                                  | Sex (final) <sup>1</sup>                             | Female                      | 513    | 71%            |
|                                  |                                                      | Male                        | 214    | 29%            |
|                                  | Date of birth record (final) <sup>1</sup>            | Available                   | >=720  | 99%            |
|                                  |                                                      | Missing                     | <= 5   | NA             |
|                                  | Date of death present in record (final) <sup>1</sup> | Present                     | 58     | 8%             |
|                                  |                                                      | Not present                 | 669    | 92%            |
|                                  | Religion                                             | Christianity                | 93     | 13%            |
|                                  |                                                      | Buddhist                    | <= 5   | NA             |
|                                  |                                                      | Other                       | 8      | 1%             |
|                                  |                                                      | No religion                 | 13     | 2%             |
|                                  |                                                      | Missing                     | >=610  | 84%            |
|                                  | Marital status                                       | Divorced/separated/single   | 15     | 2%             |
|                                  |                                                      | Married/cohabiting          | 40     | 6%             |
|                                  |                                                      | Widowed                     | 54     | 7%             |
|                                  |                                                      | Missing                     | 618    | 85%            |
|                                  | First language spoken                                | English                     | 160    | 22%            |
|                                  |                                                      | Other                       | <= 5   | NA             |
|                                  |                                                      | Missing                     | >=561  | 77%            |
|                                  | Power of attorney                                    | Yes                         | 61     | 8%             |
|                                  |                                                      | No                          | 103    | 14%            |
|                                  |                                                      | Missing                     | 563    | 77%            |
|                                  | Deprivation of Liberty status                        | Yes                         | 126    | 17%            |
|                                  |                                                      | No                          | 544    | 75%            |
|                                  |                                                      | Missing                     | 57     | 8%             |
|                                  | DNACPR status                                        | Yes                         | 572    | 79%            |
|                                  |                                                      | No                          | >= 150 | 21%            |
|                                  |                                                      | Missing                     | <= 5   | NA             |
| Weight                           | 20-35kg                                              | 7                           | 1%     |                |
|                                  | 36-50kg                                              | 109                         | 15%    |                |
|                                  | 51-65kg                                              | 232                         | 32%    |                |
|                                  | 66-80kg                                              | 152                         | 21%    |                |
|                                  | 81-95kg                                              | 43                          | 6%     |                |
|                                  | 96-110kg                                             | 21                          | 3%     |                |
|                                  | 111-125kg                                            | <= 5                        | NA     |                |
|                                  | 126-140kg                                            | <= 5                        | NA     |                |
|                                  | Missing                                              | 158                         | 22%    |                |
| Height                           | 111-125cm                                            | 8                           | 1%     |                |

|                                                                         |                                              |                                    |                                     |                 |     |
|-------------------------------------------------------------------------|----------------------------------------------|------------------------------------|-------------------------------------|-----------------|-----|
|                                                                         |                                              | 126-150cm                          | 67                                  | 9%              |     |
|                                                                         |                                              | 151-170cm                          | 508                                 | 70%             |     |
|                                                                         |                                              | 171-190cm                          | 130                                 | 18%             |     |
|                                                                         |                                              | 191-210cm                          | <=5                                 | NA              |     |
|                                                                         |                                              | Missing                            | >=8                                 | 1%              |     |
| <b>Palliative care needs</b>                                            | Discussed preferred death location indicator | Yes                                | 18                                  | 3%              |     |
|                                                                         |                                              | No                                 | 383                                 | 53%             |     |
|                                                                         |                                              | Missing                            | 326                                 | 45%             |     |
|                                                                         | Preferred death location                     | Care home                          | 7                                   | 1%              |     |
|                                                                         |                                              | Care home services with nursing    | 27                                  | 4%              |     |
|                                                                         |                                              | Care home services without nursing | 51                                  | 7%              |     |
|                                                                         |                                              | Hospice                            | <=5                                 | NA              |     |
|                                                                         |                                              | Hospital                           | <=5                                 | NA              |     |
|                                                                         |                                              | Patient's own home                 | 16                                  | 2%              |     |
|                                                                         |                                              | Other (not listed)                 | <=5                                 | NA              |     |
|                                                                         |                                              | Missing                            | 623                                 | 86%             |     |
|                                                                         | <b>Care home stay</b>                        | Client funding status              | Health funded                       | 7               | 1%  |
|                                                                         |                                              |                                    | Social care funded                  | 18              | 2%  |
|                                                                         |                                              |                                    | Client funded                       | 19              | 3%  |
|                                                                         |                                              |                                    | Joint client and social care funded | 96              | 13% |
| Other                                                                   |                                              |                                    | <=5                                 | NA              |     |
| Unknown in record                                                       |                                              |                                    | 77                                  | 11%             |     |
| Missing                                                                 |                                              |                                    | >=505                               | 70%             |     |
| Discharge from an in-patient spell to a care home (1 year history)      |                                              | Yes                                | 32                                  | 4.40%           |     |
|                                                                         |                                              | No                                 | 695                                 | 95.5%           |     |
| Death in hospital in the period between the index date and end of study |                                              | Yes                                | <=5                                 | NA              |     |
|                                                                         |                                              | No                                 | >=720                               | 99%             |     |
| Length of stay in care home                                             |                                              |                                    |                                     | 876.94 (812.60) |     |
| <b>Resident needs</b>                                                   |                                              | Cognitive impairment               | Borderline intact                   | 56              | 8%  |
|                                                                         |                                              |                                    | Intact                              | 116             | 16% |
|                                                                         |                                              |                                    | Mild impairment                     | 85              | 12% |
|                                                                         | Moderate impairment                          |                                    | 111                                 | 15%             |     |
|                                                                         | Moderately severe impairment                 |                                    | 80                                  | 11%             |     |
|                                                                         | Severe impairment                            |                                    | 88                                  | 12%             |     |
|                                                                         | Very severe impairment                       |                                    | 76                                  | 10%             |     |
|                                                                         | Missing                                      |                                    | 115                                 | 16%             |     |
|                                                                         | Bowel continence                             | Continent                          | 201                                 | 28%             |     |
|                                                                         |                                              | Incontinent                        | 289                                 | 40%             |     |
|                                                                         |                                              | Occasional accident                | 109                                 | 15%             |     |
|                                                                         |                                              | Missing                            | 128                                 | 18%             |     |
|                                                                         | Bladder continence                           | Continent                          | 143                                 | 20%             |     |
|                                                                         |                                              | Incontinent/Catheter               | 329                                 | 45%             |     |
|                                                                         |                                              | Occasional accident                | 124                                 | 17%             |     |
|                                                                         |                                              | Missing                            | 131                                 | 18%             |     |

|                                                                                       |                                                                            |                                 |               |              |  |
|---------------------------------------------------------------------------------------|----------------------------------------------------------------------------|---------------------------------|---------------|--------------|--|
|                                                                                       | ASCOT: Pain                                                                | High-level needs                | 21            | 3%           |  |
|                                                                                       |                                                                            | Some needs                      | 59            | 8%           |  |
|                                                                                       |                                                                            | No needs                        | 263           | 36%          |  |
|                                                                                       |                                                                            | Ideal state                     | 210           | 29%          |  |
|                                                                                       |                                                                            | Missing                         | 174           | 24%          |  |
|                                                                                       | ASCOT: Anxiety and low mood                                                |                                 |               | 3.97 (1.45)  |  |
|                                                                                       | Food texture requirements                                                  | IDDSI 3 - Liquidised            | <= 5          | NA           |  |
|                                                                                       |                                                                            | IDDSI 4 - Pureed                | 41            | 6%           |  |
|                                                                                       |                                                                            | IDDSI 5 - Minced & Moist        | 47            | 6%           |  |
|                                                                                       |                                                                            | IDDSI 6 - Soft & Bite-sized     | 65            | 9%           |  |
|                                                                                       |                                                                            | IDDSI 7 - Easy to Chew          | 34            | 5%           |  |
|                                                                                       |                                                                            | IDDSI 7 - Regular               | 482           | 66%          |  |
|                                                                                       |                                                                            | Missing                         | >=54          | 8%           |  |
|                                                                                       | Drink thickness requirements                                               | IDDSI 0 - Thin                  | 598           | 82%          |  |
|                                                                                       |                                                                            | IDDSI 1 - Slightly thick        | 30            | 4%           |  |
|                                                                                       |                                                                            | IDDSI 2 - Mildly thick          | 23            | 3%           |  |
|                                                                                       |                                                                            | IDDSI 3 - Moderately thick      | <= 5          | NA           |  |
|                                                                                       |                                                                            | IDDSI 4 - Extremely thick       | <= 5          | NA           |  |
|                                                                                       |                                                                            | Missing                         | 71            | 10%          |  |
|                                                                                       | Food allergy                                                               | Yes                             | 26            | 4%           |  |
|                                                                                       |                                                                            | No                              | 633           | 87%          |  |
|                                                                                       |                                                                            | Missing                         | 68            | 9%           |  |
|                                                                                       | Contact allergy                                                            | Yes                             | <= 5          | NA           |  |
|                                                                                       |                                                                            | No                              | 156           | 21%          |  |
|                                                                                       |                                                                            | Missing                         | >=564         | 78%          |  |
|                                                                                       | Medication allergy                                                         | Yes                             | 73            | 10%          |  |
|                                                                                       |                                                                            | No                              | 88            | 12%          |  |
|                                                                                       |                                                                            | Missing                         | 566           | 78%          |  |
|                                                                                       | Penicillin allergy                                                         | Yes                             | 27            | 4%           |  |
|                                                                                       |                                                                            | No                              | 134           | 18%          |  |
|                                                                                       |                                                                            | Missing                         | 566           | 78%          |  |
|                                                                                       | Pressure ulcers (Waterlow score) (reported for 527 residents/ 28% missing) |                                 |               | 17.87 (7.30) |  |
|                                                                                       | Pressure ulcers (Braden score) (reported for 338 residents/ 54% missing)   |                                 |               | 16.61 (4.02) |  |
| Delirium (I-AGED score) (reported for 582 residents/ 20% missing)                     |                                                                            |                                 | 1.11 (1.78)   |              |  |
| Functional independence (Barthel score) (reported for 566 residents/ 22% missing)     |                                                                            |                                 | 41.40 (30.26) |              |  |
| Number of ED attendance or outpatient appointments with nasogastric feeding procedure |                                                                            |                                 | NA            |              |  |
| <b>Quality of life</b>                                                                | Quality of Life overall (reported for 596 residents/ 18% missing)          | So good, it could not be better | 19            | 3%           |  |
|                                                                                       |                                                                            | Very good                       | 157           | 22%          |  |
|                                                                                       |                                                                            | Good                            | 201           | 28%          |  |
|                                                                                       |                                                                            | Alright                         | 171           | 24%          |  |
|                                                                                       |                                                                            | Bad                             | 32            | 4%           |  |
|                                                                                       |                                                                            | Very bad                        | 9             | 1%           |  |
|                                                                                       |                                                                            | So bad, it could not be worse   | 7             | 1%           |  |
|                                                                                       |                                                                            | Missing                         | 131           | 18%          |  |
|                                                                                       | Ascot Proxy-Resident (reported for 488 residents/ 33% missing)             |                                 |               | 0.83 (0.19)  |  |

|                                                                                                                                                            |                                                                                                     |                                                                                                     |             |             |
|------------------------------------------------------------------------------------------------------------------------------------------------------------|-----------------------------------------------------------------------------------------------------|-----------------------------------------------------------------------------------------------------|-------------|-------------|
|                                                                                                                                                            | ICECAP-O (reported for 569 residents/ 22% missing)                                                  |                                                                                                     | 0.73 (0.21) |             |
|                                                                                                                                                            | UK Crosswalk (reported for 631 residents/ 13% missing)                                              |                                                                                                     | 0.33 (0.35) |             |
| <b>Complications/<br/>adverse events</b>                                                                                                                   | MUST (malnutrition universal scoring tool) score                                                    | 0                                                                                                   | 101         | 14%         |
|                                                                                                                                                            |                                                                                                     | 1                                                                                                   | 23          | 3%          |
|                                                                                                                                                            |                                                                                                     | 2                                                                                                   | 20          | 3%          |
|                                                                                                                                                            |                                                                                                     | 3                                                                                                   | 12          | 2%          |
|                                                                                                                                                            |                                                                                                     | 4                                                                                                   | 6           | 1%          |
|                                                                                                                                                            |                                                                                                     | 5                                                                                                   | <=5         | NA          |
|                                                                                                                                                            |                                                                                                     | Missing                                                                                             | >=562       | 78%         |
|                                                                                                                                                            |                                                                                                     | Frequency of in-patient admissions with upper respiratory tract infection recorded (1 year history) |             | 0.01 (0.10) |
|                                                                                                                                                            | Frequency of in-patient admissions with lower respiratory tract infection recorded (1 year history) |                                                                                                     | NA          |             |
| <b>Diagnoses</b><br>(based on previous 3 years hospital admission diagnosis codes) (reported for 583 residents/ 20% missing) apart from 'dementia (final)' | Dementia (final) <sup>1</sup>                                                                       | 514                                                                                                 | 71%         |             |
|                                                                                                                                                            | <i>Elixhauser conditions</i> <sup>2</sup>                                                           |                                                                                                     |             |             |
|                                                                                                                                                            | Number of <i>Elixhauser</i> conditions                                                              |                                                                                                     | 3.59 (2.34) |             |
|                                                                                                                                                            | 2 or more <i>Elixhauser</i> conditions                                                              | 470                                                                                                 | 81%         |             |
|                                                                                                                                                            | Alcohol abuse                                                                                       | 22                                                                                                  | 4%          |             |
|                                                                                                                                                            | Anaemia                                                                                             | 83                                                                                                  | 14%         |             |
|                                                                                                                                                            | Cardiac arrhythmias                                                                                 | 189                                                                                                 | 32%         |             |
|                                                                                                                                                            | Chronic pulmonary disease                                                                           | 110                                                                                                 | 19%         |             |
|                                                                                                                                                            | Coagulopathy                                                                                        | 15                                                                                                  | 3%          |             |
|                                                                                                                                                            | Congestive heart failure                                                                            | 86                                                                                                  | 15%         |             |
|                                                                                                                                                            | Depression                                                                                          | 129                                                                                                 | 22%         |             |
|                                                                                                                                                            | Diabetes (complicated and uncomplicated)                                                            | 127                                                                                                 | 22%         |             |
|                                                                                                                                                            | Drug abuse                                                                                          | <=5                                                                                                 | NA          |             |
|                                                                                                                                                            | Fluid and electrolyte disorders                                                                     | 226                                                                                                 | 39%         |             |
|                                                                                                                                                            | Hemiplegia / paraplegia                                                                             | 20                                                                                                  | 3%          |             |
|                                                                                                                                                            | Hypertension (complicated and uncomplicated)                                                        | 353                                                                                                 | 61%         |             |
|                                                                                                                                                            | Hypothyroidism                                                                                      | 75                                                                                                  | 13%         |             |
|                                                                                                                                                            | Liver disease                                                                                       | 30                                                                                                  | 5%          |             |
|                                                                                                                                                            | Lymphoma                                                                                            | 6                                                                                                   | 1%          |             |
|                                                                                                                                                            | Metastatic solid tumour / metastatic cancer                                                         | 11                                                                                                  | 2%          |             |
|                                                                                                                                                            | Obesity                                                                                             | 39                                                                                                  | 7%          |             |
|                                                                                                                                                            | Other neurological disorders                                                                        | 154                                                                                                 | 26%         |             |
|                                                                                                                                                            | Peptic ulcer disease excl bleeding                                                                  | 6                                                                                                   | 1%          |             |
|                                                                                                                                                            | Psychoses                                                                                           | 13                                                                                                  | 2%          |             |
|                                                                                                                                                            | Pulmonary circulation disorders                                                                     | 25                                                                                                  | 4%          |             |
|                                                                                                                                                            | Peripheral vascular disease                                                                         | 47                                                                                                  | 8%          |             |
|                                                                                                                                                            | Rheumatoid arthritis / collagen vascular diseases                                                   | 179                                                                                                 | 31%         |             |
|                                                                                                                                                            | Renal failure                                                                                       | 39                                                                                                  | 7%          |             |
|                                                                                                                                                            | Solid tumour without metastasis                                                                     | 22                                                                                                  | 4%          |             |
|                                                                                                                                                            | Valvular disease                                                                                    | 67                                                                                                  | 11%         |             |
|                                                                                                                                                            | Weight loss                                                                                         | 19                                                                                                  | 3%          |             |
|                                                                                                                                                            | <i>Frailty syndromes</i> <sup>3</sup>                                                               |                                                                                                     |             |             |
|                                                                                                                                                            | Number of frailty syndromes                                                                         |                                                                                                     | 2.17 (1.81) |             |
|                                                                                                                                                            | Cognitive impairment (delirium, dementia, senility)                                                 | 457                                                                                                 | 78%         |             |
| Anxiety/Depression                                                                                                                                         | 168                                                                                                 | 29%                                                                                                 |             |             |
| Functional dependence                                                                                                                                      | 102                                                                                                 | 17%                                                                                                 |             |             |

|                               |                                                                              |                                                                                                |                                     |                  |
|-------------------------------|------------------------------------------------------------------------------|------------------------------------------------------------------------------------------------|-------------------------------------|------------------|
|                               | Falls/Fractures                                                              | 291                                                                                            | 50%                                 |                  |
|                               | Incontinence                                                                 | 105                                                                                            | 18%                                 |                  |
|                               | Mobility problems                                                            | 217                                                                                            | 37%                                 |                  |
|                               | Pressure ulcers                                                              | 62                                                                                             | 11%                                 |                  |
| <b>Healthcare utilisation</b> |                                                                              | <i>n (people with at least one event)</i>                                                      | <i>% who had at least one event</i> |                  |
|                               | Elective admissions (1 year history)                                         | 65                                                                                             | 9%                                  |                  |
|                               | Emergency admissions (1 year history)                                        | 284                                                                                            | 39%                                 |                  |
|                               | Potentially avoidable emergency admissions (1 year history) <sup>4</sup>     | 119                                                                                            | 16%                                 |                  |
|                               | Emergency department attendances (1 year history)                            | 370                                                                                            | 51%                                 |                  |
|                               | Emergency department attendances via ambulance (1 year history)              | 331                                                                                            | 46%                                 |                  |
|                               | Emergency department attendances after 6pm/ before 8am (1 year history)      | 218                                                                                            | 30%                                 |                  |
|                               | Emergency department attendances lasting more than 12 hours (1 year history) | 156                                                                                            | 21%                                 |                  |
|                               | Emergency department attendances for falls (1 year history)                  | 18                                                                                             | 2%                                  |                  |
|                               | Outpatient appointments (1 year history)                                     | 236                                                                                            | 32%                                 |                  |
|                               | Missed outpatient appointments (1 year history)                              | 28                                                                                             | 4%                                  |                  |
|                               | Community services appointments (1 year history)                             | 608                                                                                            | 84%                                 |                  |
|                               | Speech and language therapy appointments (1 year history)                    | 49                                                                                             | 7%                                  |                  |
|                               | Continence appointments (1 year history)                                     | 159                                                                                            | 26%                                 |                  |
|                               | District nursing appointments (1 year history)                               | 398                                                                                            | 55%                                 |                  |
|                               | Podiatry appointments (1 year history)                                       | 31                                                                                             | 4%                                  |                  |
|                               | Community rehabilitation appointments (1 year history)                       | 79                                                                                             | 11%                                 |                  |
|                               | Face to face community services appointments (1 year history)                | 444                                                                                            | 61%                                 |                  |
|                               | Missed community services appointments (1 year history)                      | 22                                                                                             | 3%                                  |                  |
|                               | Ambulance call outs (1 June - 31 October 2023)                               | 197                                                                                            | 27%                                 |                  |
|                               | Ambulance attendances (1 June - 31 October 2023)                             | 195                                                                                            | 27%                                 |                  |
|                               | Ambulance attendances after 6pm/ before 8am (1 June - 31 October 2023)       | 118                                                                                            | 16%                                 |                  |
|                               | Ambulance conveyances (1 June - 31 October 2023)                             | 147                                                                                            | 20%                                 |                  |
|                               |                                                                              | <i>Total activity</i>                                                                          |                                     | <i>Mean (SD)</i> |
|                               |                                                                              | Average number of emergency admissions (1 year history)                                        | 451                                 | 0.62 (1.02)      |
|                               |                                                                              | Average number of elective admissions (1 year history)                                         | 97                                  | 0.13 (0.60)      |
|                               |                                                                              | Average number of potentially avoidable emergency admissions (1 year history) <sup>4</sup>     | 143                                 | 0.20 (0.48)      |
|                               |                                                                              | Average number of emergency department attendances (1 year history)                            | 752                                 | 1.03 (1.49)      |
|                               |                                                                              | Average number of emergency department attendances after 6pm/ before 8am (1 year history)      | 331                                 | 0.46 (0.85)      |
|                               |                                                                              | Average number of emergency department attendances lasting more than 12 hours (1 year history) | 206                                 | 0.28 (0.63)      |
|                               |                                                                              | Average number of emergency department attendances via ambulance (1 year history)              | 605                                 | 0.83 (1.27)      |
|                               |                                                                              | Average number of emergency department attendances due to a fall (1 year history)              | 21                                  | 0.03 (0.20)      |
|                               | Average number of outpatient appointments (1 year history)                   | 424                                                                                            | 0.58 (1.47)                         |                  |
|                               | Average number of missed outpatient appointments (1 year history)            | 29                                                                                             | 0.04 (0.20)                         |                  |

|                                                                |                                                                                        |                                                                                 |               |              |
|----------------------------------------------------------------|----------------------------------------------------------------------------------------|---------------------------------------------------------------------------------|---------------|--------------|
|                                                                | year history)                                                                          |                                                                                 |               |              |
|                                                                | Average number of community services appointments (1 year history)                     | 15266                                                                           | 21.00 (65.83) |              |
|                                                                | Average number of missed community services appointments (1 year history)              | 36                                                                              | 0.05 (0.33)   |              |
|                                                                | Average number of face to face community services appointments (1 year history)        | 6720                                                                            | 9.24 (30.47)  |              |
|                                                                | Average number of district nursing appointments (1 year history)                       | 11347                                                                           | 15.61 (61.82) |              |
|                                                                | Average number of speech and language therapy appointments (1 year history)            | 155                                                                             | 0.21 (1.03)   |              |
|                                                                | Average number of podiatry appointments (1 year history)                               | 286                                                                             | 0.39 (3.98)   |              |
|                                                                | Average number of continence appointments (1 year history)                             | 373                                                                             | 0.51 (1.44)   |              |
|                                                                | Average number of community rehabilitation appointments (1 year history)               | 470                                                                             | 0.65 (3.85)   |              |
|                                                                | Average number of ambulance call outs (1 June-31 October 2023)                         | 333                                                                             | 0.45 (0.97)   |              |
|                                                                | Average number of ambulance attendances (1 June-31 October 2023)                       | 325                                                                             | 1.65 (1.21)   |              |
|                                                                | Average number of ambulance attendances after 6pm/ before 8am (1 June-31 October 2023) | 156                                                                             | 0.21 (0.57)   |              |
|                                                                | Average number of ambulance conveyances (1 June-31 October 2023)                       | 210                                                                             | 0.29 (0.72)   |              |
| <b>Care home characteristics and workforce characteristics</b> | Service type                                                                           | Nursing                                                                         | 403           | 55%          |
|                                                                |                                                                                        | Nursing and Residential                                                         | 49            | 7%           |
|                                                                |                                                                                        | Residential                                                                     | 262           | 36%          |
|                                                                |                                                                                        | Missing                                                                         | 13            | 2%           |
|                                                                | Registered bed capacity                                                                | Less than 50                                                                    | 211           | 29%          |
|                                                                |                                                                                        | 50 or more                                                                      | 485           | 67%          |
|                                                                |                                                                                        | Missing                                                                         | 31            | 4%           |
|                                                                | CQC rating                                                                             | Outstanding                                                                     | 72            | 10%          |
|                                                                |                                                                                        | Good                                                                            | 511           | 70%          |
|                                                                |                                                                                        | Requires improvement                                                            | 113           | 16%          |
|                                                                |                                                                                        | Missing                                                                         | 31            | 4%           |
|                                                                | Years of service registration                                                          | Less than 10 years                                                              | 238           | 33%          |
|                                                                |                                                                                        | More than 10 years                                                              | 458           | 63%          |
|                                                                |                                                                                        | Missing                                                                         | 31            | 4%           |
|                                                                |                                                                                        | Number of beds (reported for 696 residents/ 4% missing)                         |               | 54.33(16.68) |
|                                                                |                                                                                        | Number of beds currently occupied (reported for 696 residents/ 4% missing)      |               | 42.54(14.75) |
|                                                                |                                                                                        | Number of resident fully self-funding (reported for 650 residents/ 11% missing) |               | 22.41(16.26) |
|                                                                | Number of staff (reported for 696 residents/ 4% missing)                               |                                                                                 | 67.52(32.16)  |              |
|                                                                | Number of full-time staff (reported for 696 residents/ 4% missing)                     |                                                                                 | 45.55(20.35)  |              |
|                                                                | Number of part-time staff (reported for 659 residents/ 9% missing)                     |                                                                                 | 19.32(13.42)  |              |
|                                                                | Number of staff on permanent contracts (reported for 659 residents/ 9% missing)        |                                                                                 | 62.54(28.14)  |              |
|                                                                | Number of staff vacancies (reported for 696 residents/ 31% missing)                    |                                                                                 | 3.77(10.36)   |              |
|                                                                | Number of agency staff (reported for 600 residents/ 17% missing)                       |                                                                                 | 1.52(4.28)    |              |
|                                                                | Number of care workers (reported for 659 residents/ 9% missing)                        |                                                                                 | 32.44(20.69)  |              |
|                                                                | Number of senior care workers (reported for 659 residents/ 9% missing)                 |                                                                                 | 9.45(4.43)    |              |

|  |                                                                                                 |  |              |
|--|-------------------------------------------------------------------------------------------------|--|--------------|
|  | Number of registered nurses (reported for 644 residents/ 11% missing)                           |  | 5.05(6.07)   |
|  | Number of nursing associates (reported for 632 residents/ 13% missing)                          |  | 0.43(1.31)   |
|  | Number of nursing assistants (reported for 632 residents/ 13% missing)                          |  | 0.31(0.89)   |
|  | Number of allied health professionals (reported for 632 residents/ 13% missing)                 |  | 0(0)         |
|  | Number of activities coordinators (reported for 659 residents/ 9% missing)                      |  | 1.75(1.38)   |
|  | Number of staff in roles above on permanent contracts (reported for 632 residents/ 13% missing) |  | 43.98(25.68) |
|  | Number of staff vacancies in roles above (reported for 632 residents/ 13% missing)              |  | 1.93(1.84)   |
|  | Number of agency staff in roles above (reported for 592 residents/ 19% missing)                 |  | 0.71(3.67)   |

Footnotes

- 1 reporting variable as created in the hierarchy process – see Table 3 in Main Article
- 2 Elixhauser list of comorbidities (Elixhauser et al. 1998; Quan et al. 2005)
- 3 Frailty Syndromes (Soong et al. 2015)

Potentially avoidable emergency admissions (Care Quality Commission. 2013).



## APPENDIX 11 – Using MDS data to understand ED attendance and ambulance activity for care home residents: a worked example

In the main report, we presented key variables from the MDS with a full description of the MDS in Appendix 8. However, a key benefit of an MDS is the ability to explore sub groups of residents. These tables are examples of analyses that could help understand whether there are differences in outcomes or activities in different subgroups. Tables below are examples of such subgroup analyses which were suggested by stakeholders as of interest. For example, in our sample population, activity was in general higher across both A&E and ambulance services for those in residential care homes, compared to nursing homes, which could be informative when commissioning local services.

Table a) ED attendances for year leading to index date 1. \* where no mean reported as denominator <=5. Mean reports the mean of all those eligible e.g. can only have ED attendance via ambulance if you have had an ED attendance

| Variable                                                  | Total          | Sex            |                | Age            |                |                |                | Nursing vs residential |                |                | Dementia       |                |           | Deprivation <sup>1</sup> |                               |                |                             |                      |                |
|-----------------------------------------------------------|----------------|----------------|----------------|----------------|----------------|----------------|----------------|------------------------|----------------|----------------|----------------|----------------|-----------|--------------------------|-------------------------------|----------------|-----------------------------|----------------------|----------------|
|                                                           |                | Female         | Male           | <65            | 65-79          | >=80           | Missing        | Nursing                | Residential    | Missing        | No             | Yes            | Missing   | Most deprived fifth      | Second most deprived quintile | Middle fifth   | Second least deprived fifth | Least deprived fifth | Missing        |
| <b>N</b>                                                  | <b>727</b>     | <b>513</b>     | <b>214</b>     | <b>17</b>      | <b>125</b>     | <b>486</b>     | <b>99</b>      | <b>452</b>             | <b>262</b>     | <b>13</b>      | <b>191</b>     | <b>514</b>     | <b>22</b> | <b>81</b>                | <b>158</b>                    | <b>72</b>      | <b>119</b>                  | <b>198</b>           | <b>99</b>      |
| <b>Mean (SD)</b>                                          |                |                |                |                |                |                |                |                        |                |                |                |                |           |                          |                               |                |                             |                      |                |
| <i>Number of A&amp;E attendances</i>                      | 1.03<br>(1.49) | 0.94<br>(1.44) | 1.25<br>(1.61) | 1.06<br>(1.34) | 1.05<br>(1.46) | 0.93<br>(1.41) | 1.51<br>(1.85) | 0.92<br>(1.44)         | 1.21<br>(1.57) | 1.38<br>(1.50) | 0.92<br>(1.39) | 1.11<br>(1.55) | *         | 0.95<br>(1.37)           | 1.02<br>(1.40)                | 1.04<br>(1.30) | 1.13<br>(1.63)              | 0.79<br>(1.35)       | 1.51<br>(1.85) |
| <i>Number of out of hours A&amp;E attendances</i>         | 0.46<br>(0.85) | 0.41<br>(0.77) | 0.57<br>(1.00) | 0.76<br>(1.25) | 0.50<br>(0.81) | 0.41<br>(0.81) | 0.56<br>(0.95) | 0.39<br>(0.82)         | 0.56<br>(0.90) | *              | 0.38<br>(0.81) | 0.50<br>(0.87) | *         | 0.52<br>(1.01)           | 0.47<br>(0.78)                | 0.47<br>(0.87) | 0.48<br>(0.85)              | 0.35<br>(0.75)       | 0.56<br>(0.95) |
| <i>Number of A&amp;E attendances lasting &gt;12 hours</i> | 0.28<br>(0.63) | 0.25<br>(0.62) | 0.36<br>(0.65) | *              | 0.35<br>(0.65) | 0.25<br>(0.59) | 0.36<br>(0.80) | 0.26<br>(0.58)         | 0.32<br>(0.72) | *              | 0.29<br>(0.71) | 0.29<br>(0.62) | *         | 0.07<br>(0.26)           | 0.34<br>(0.66)                | 0.32<br>(0.60) | 0.21<br>(0.57)              | 0.32<br>(0.66)       | 0.36<br>(0.80) |
| <i>Number of A&amp;E attendances via ambulance</i>        | 0.83<br>(1.27) | 0.76<br>(1.22) | 1.00<br>(1.37) | 0.71<br>(1.16) | 0.82<br>(1.23) | 0.79<br>(1.27) | 1.09<br>(1.33) | 0.72<br>(1.22)         | 1.02<br>(1.34) | 1.00<br>(1.15) | 0.76<br>(1.23) | 0.89<br>(1.30) | *         | 0.85<br>(1.29)           | 0.91<br>(1.26)                | 0.90<br>(1.13) | 0.79<br>(1.40)              | 0.63<br>(1.18)       | 1.09<br>(1.33) |
| <i>Number of A&amp;E attendances for falls</i>            | 0.03<br>(0.20) | 0.02<br>(0.16) | 0.04<br>(0.26) | *              | *              | 0.02<br>(0.19) | 0.08<br>(0.31) | *                      | 0.06<br>(0.30) | *              | *              | 0.04<br>(0.22) | *         | *                        | *                             | *              | *                           | *                    | 0.08<br>(0.31) |

### Footnotes

1- Deprivation is based on LSOA of the care home

Table b) Ambulance activity for 5 month period from 1 June to 31 October. \* where no mean reported as denominator <=5. Mean reports the mean of all those eligible e.g. can only have ED attendance via ambulance if you have had an ED attendance

| Variable                                            | Total       | Sex         |             | Age       |             |             | Nursing vs residential |             |             |           | Dementia    |             |           | Deprivation <sup>1</sup> |                               |              |                             |                      |             |
|-----------------------------------------------------|-------------|-------------|-------------|-----------|-------------|-------------|------------------------|-------------|-------------|-----------|-------------|-------------|-----------|--------------------------|-------------------------------|--------------|-----------------------------|----------------------|-------------|
|                                                     |             | Female      | Male        | <65       | 65-79       | >=80        | Missing                | Nursing     | Residential | Missing   | No          | Yes         | Missing   | Most deprived fifth      | Second most deprived quintile | Middle fifth | Second least deprived fifth | Least deprived fifth | Missing     |
| <b>N</b>                                            | <b>727</b>  | <b>513</b>  | <b>214</b>  | <b>17</b> | <b>125</b>  | <b>486</b>  | <b>99</b>              | <b>452</b>  | <b>262</b>  | <b>13</b> | <b>191</b>  | <b>514</b>  | <b>22</b> | <b>81</b>                | <b>158</b>                    | <b>72</b>    | <b>119</b>                  | <b>198</b>           | <b>99</b>   |
| <b>Mean (SD)</b>                                    |             |             |             |           |             |             |                        |             |             |           |             |             |           |                          |                               |              |                             |                      |             |
| <i>Number of ambulance call outs</i>                | 0.46 (0.99) | 0.42 (0.90) | 0.54 (1.19) | *         | 0.47 (1.22) | 0.41 (0.91) | 0.74 (1.09)            | 0.41 (1.02) | 0.52 (0.91) | *         | 0.54 (1.08) | 0.44 (0.97) | *         | 0.85 (1.59)              | 0.35 (0.88)                   | 0.38 (0.76)  | 0.42 (0.81)                 | 0.30 (0.81)          | 0.74 (1.09) |
| <i>Number of ambulance attendances</i>              | 0.45 (0.97) | 0.42 (0.89) | 0.52 (1.14) | *         | 0.45 (1.20) | 0.41 (0.89) | 0.71 (1.04)            | 0.40 (0.99) | 0.52 (0.91) | *         | 0.53 (1.08) | 0.43 (0.94) | *         | 0.83 (1.52)              | 0.35 (0.88)                   | 0.38 (0.76)  | 0.42 (0.81)                 | 0.28 (0.79)          | 0.71 (1.04) |
| <i>Number of out of hours ambulance attendances</i> | 0.21 (0.57) | 0.20 (0.50) | 0.25 (0.71) | *         | 0.22 (0.58) | 0.20 (0.55) | 0.33 (0.69)            | 0.18 (0.53) | 0.26 (0.63) | *         | 0.23 (0.58) | 0.22 (0.58) | *         | 0.38 (0.92)              | 0.13 (0.41)                   | 0.24 (0.52)  | 0.23 (0.51)                 | 0.14 (0.47)          | 0.33 (0.69) |
| <i>Number of ambulance conveyances</i>              | 0.29 (0.72) | 0.27 (0.67) | 0.35 (0.85) | *         | 0.35 (0.98) | 0.26 (0.67) | 0.40 (0.65)            | 0.27 (0.77) | 0.32 (0.62) | *         | 0.38 (0.87) | 0.26 (0.67) | *         | 0.60 (1.13)              | 0.16 (0.64)                   | 0.28 (0.56)  | 0.31 (0.69)                 | 0.20 (0.64)          | 0.40 (0.65) |

Footnotes

1- Deprivation is based on LSOA of the care home
